# Supplementary material for: Prognosis of Alzheimer’s Disease Using Quantitative Mass Spectrometry of Human Blood Plasma Proteins and Machine Learning
Source: MDPI journal article supplement (doi:10.3390/ijms23147907), 2022-07-18
Supplement: s1 [file s1]

# Supplementary Figure S1

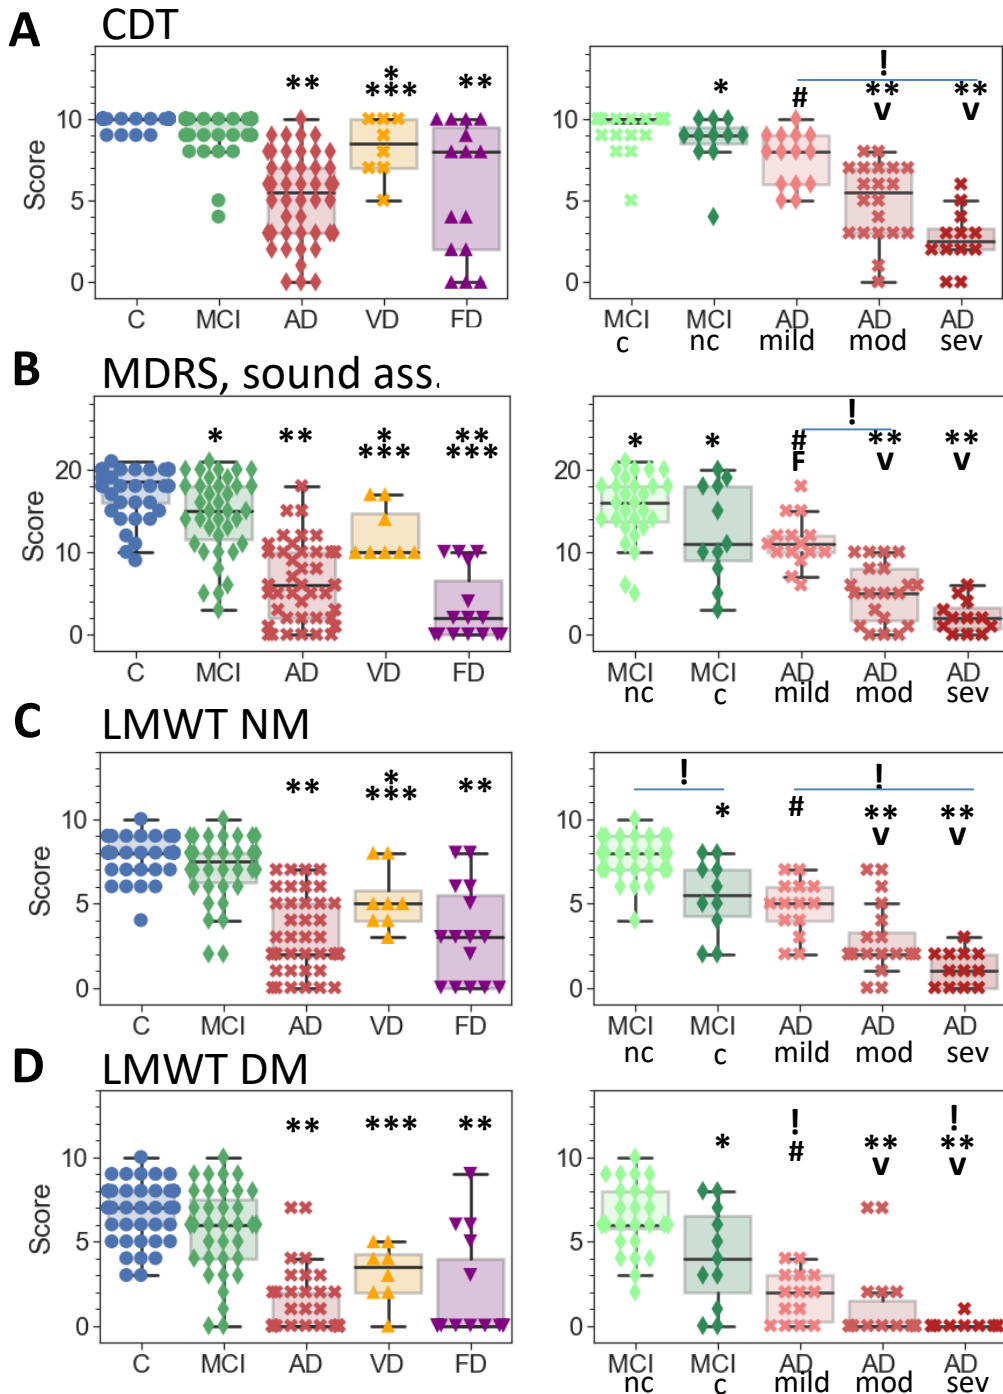

**Figure S1. The results of study participants using psychometric tests and scales: (A) clock drawing test (CDT); (B) Mattis dementia rating scale (MDRS), **sound** associations subtest; (C, D) Luria memory words test (LMWT, NM – non-intermediate memorization, DM – delayed memorization). MCI – mild cognitive impairment (nc – non-converter, c – converter); AD – Alzheimer’s disease (mild, moderate, and severe subgroups); VD – vascular dementia; FD – frontotemporal dementia. Lines inside boxes show medians; box flanges – 25-75 percentiles; whisker range  $\pm$ SD. Significantly different results, with  $p$ -values  $< 0.01$  according to Mann-Whitney U-test, are shown with the following symbols: \* - significantly different to the control group; \*\* - to control and MCI groups; \*\*\* - to control, MCI, and AD groups; \*\*\*\* - to control and AD groups; \*\*\*\*\* - to control, MCI, AD, and VD groups; # - to control and MCI-nc; “F” – to FD; “V” – to VD; “!” – significant difference between subgroups.**

*Supplementary Figure S2*

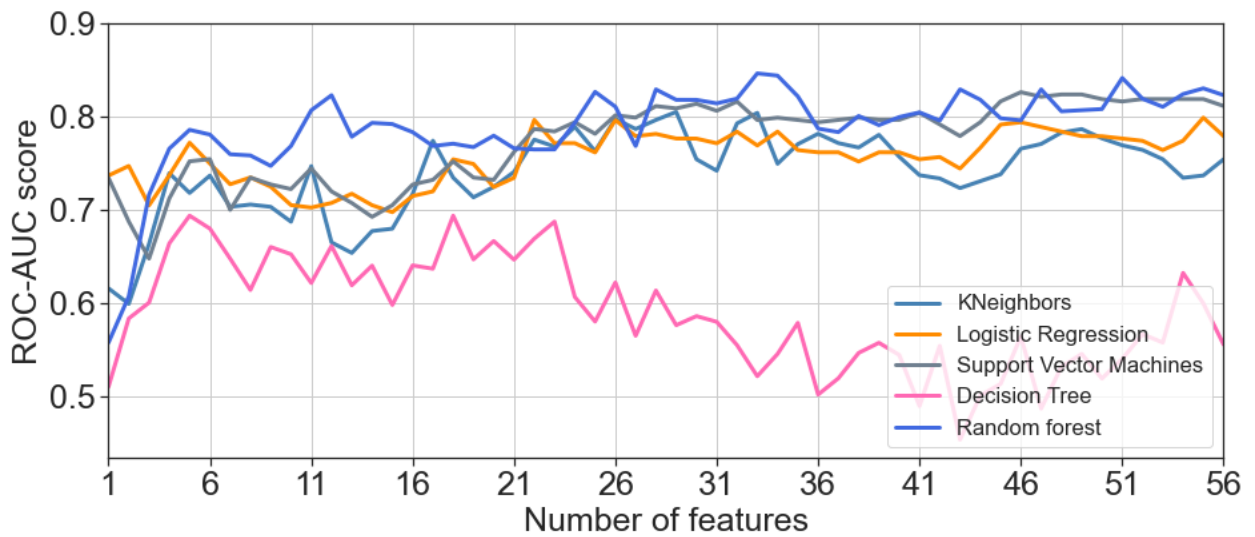

**Figure S2.** Preliminary evaluation of the effectiveness of different algorithms in the binary classification of AD versus control.

*Supplementary Figure S3*

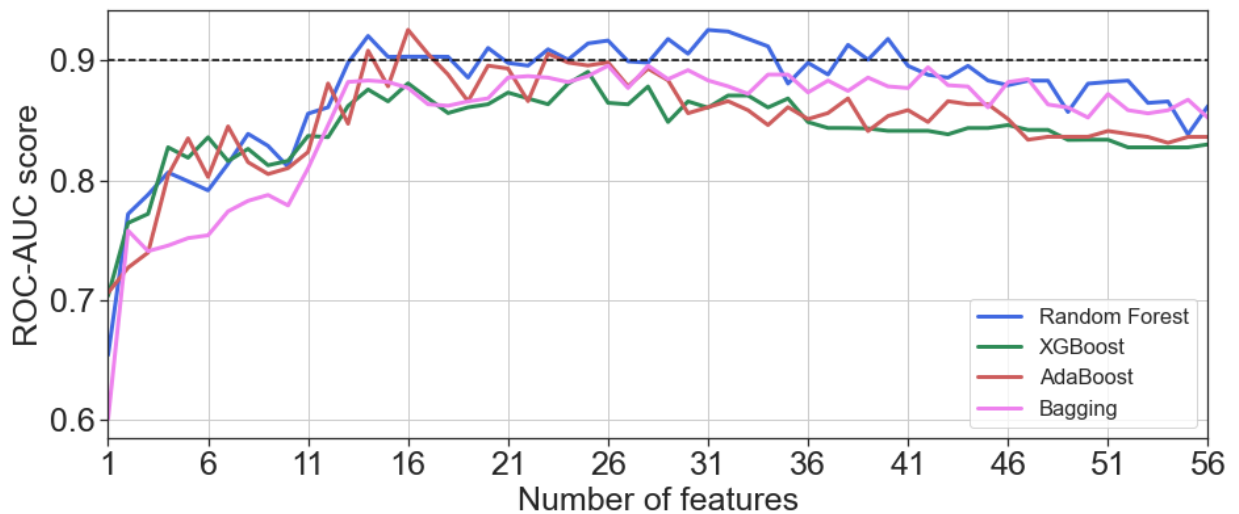

**Figure S3.** The optimization of models for binary classification of AD and control samples based on RF, AdaBoost, XGBoost, and Bagging algorithms.

## Supplementary Figure S4

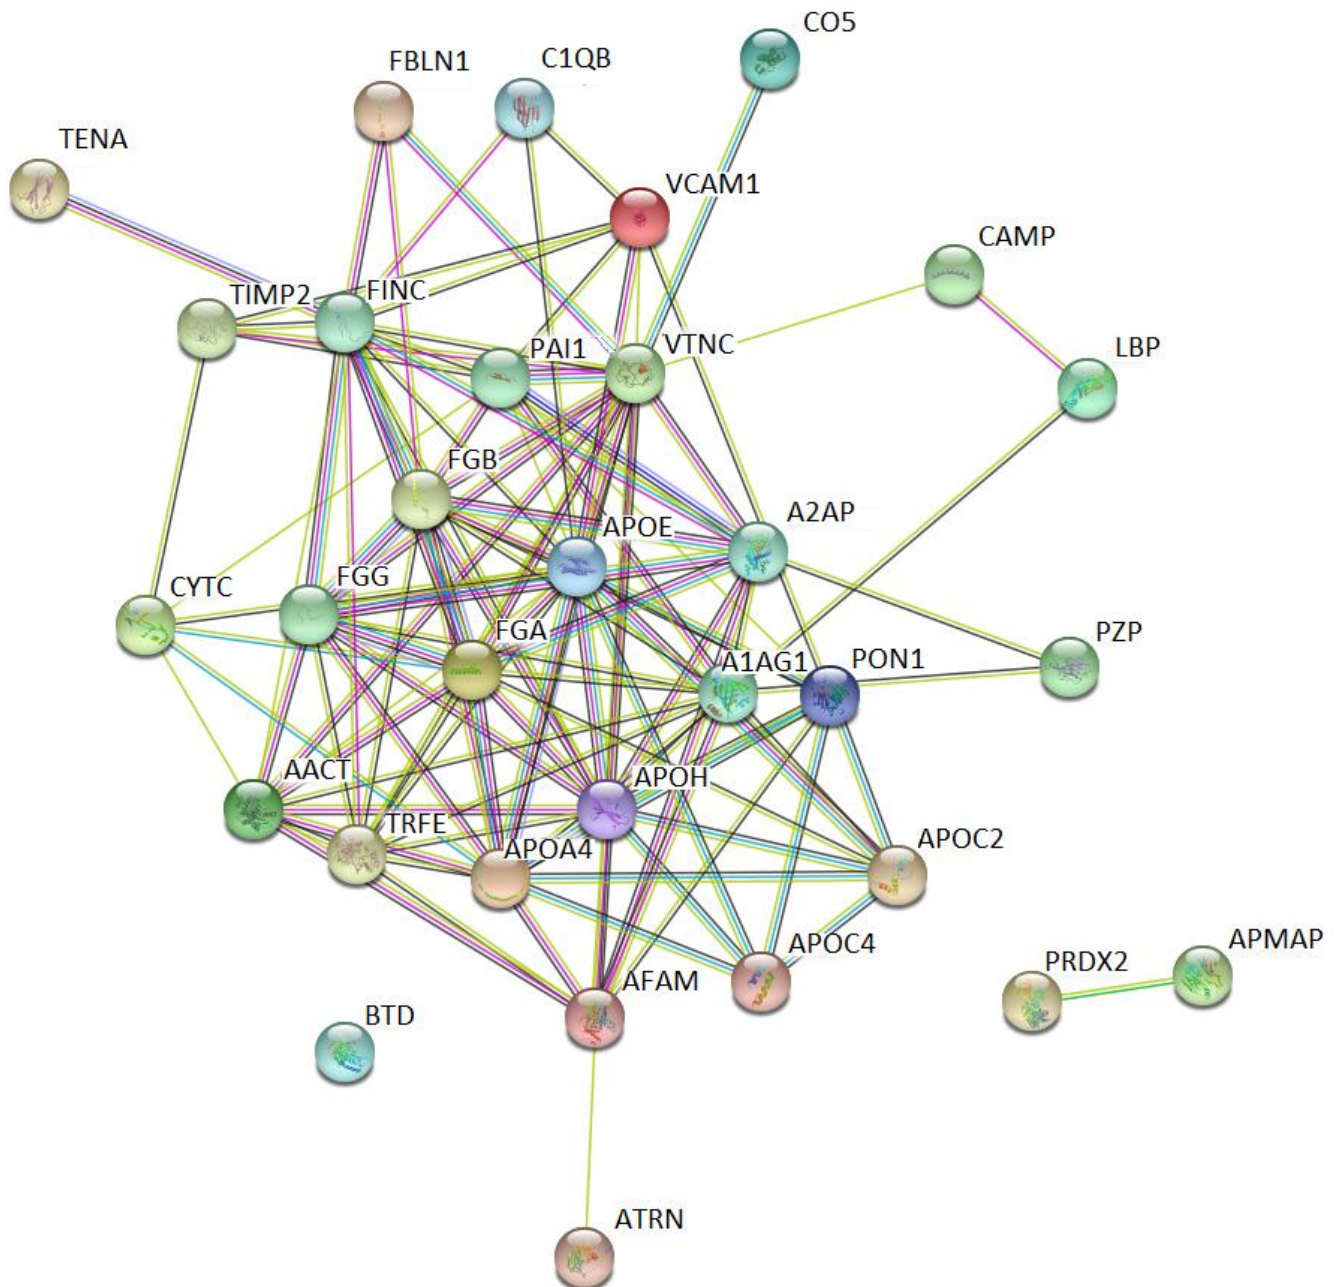

**Figure S4.** The STRING protein interaction network for 31 proteins important for AD distinction in this study.

# Supplementary Figure S5

AD classification score

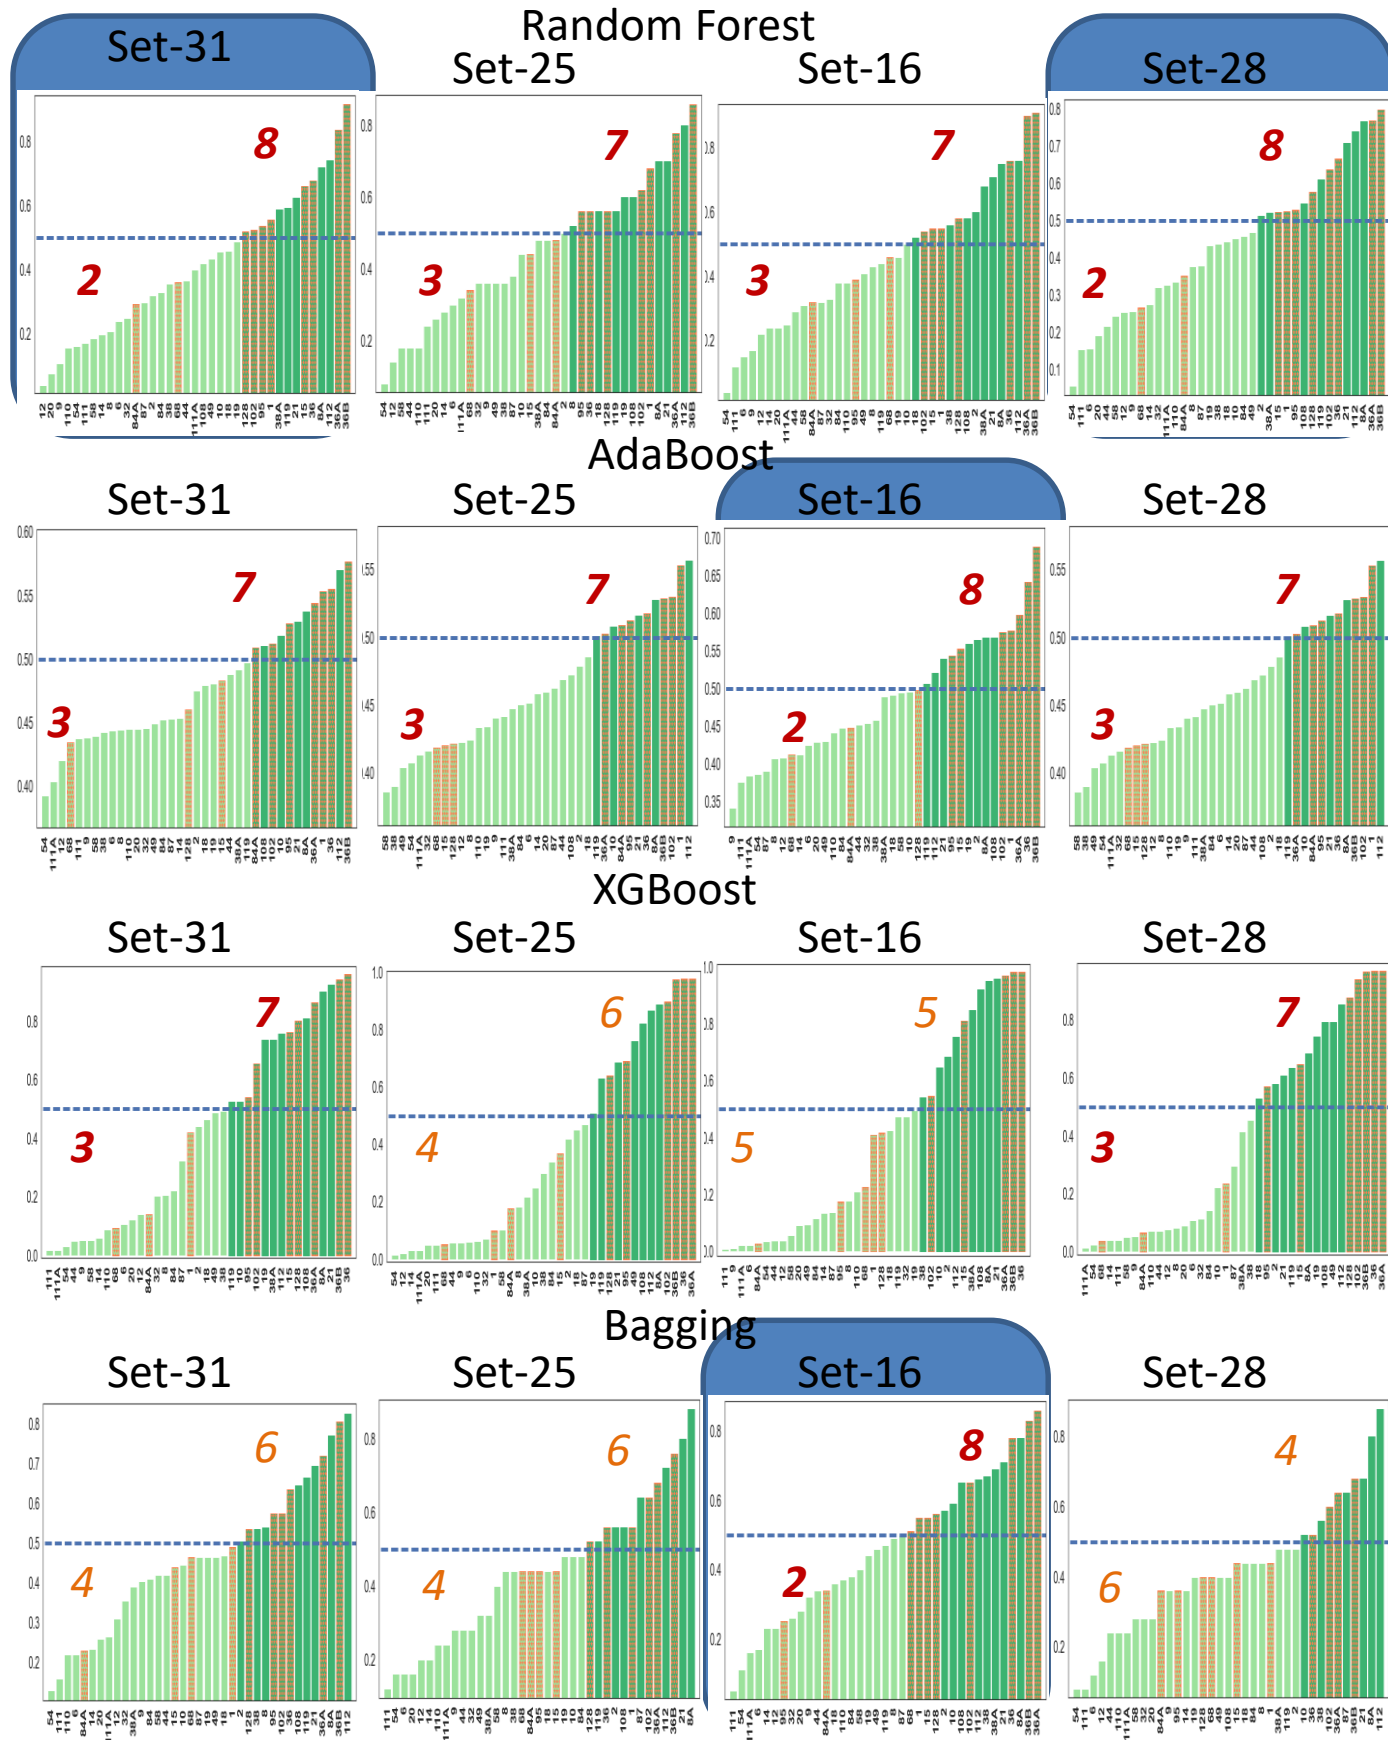

**Figure S4.** The differentiation of MCI patients using 16 classifiers. The most effective classifiers are marked with a blue background.
