# Supplementary material for: Prognosis of Alzheimer’s Disease Using Quantitative Mass Spectrometry of Human Blood Plasma Proteins and Machine Learning
Source: Int J Mol Sci. 2022 Jul 18;23(14):7907. doi: 10.3390/ijms23147907 (PMC9318764; doi:10.3390/ijms23147907)
Supplement: Supplementary file 1 [file ijms-23-07907-s001.zip]

Archive with 9 entries (9 files):
- Supplementary file_Methods.pdf
- Supplementary Table-S5_GO proteins annotation.xlsx
- Supplementary-Table-S2_rev.xlsx
- Supplementary-Table-S3.xlsx
- Supplementary-Table-S4.xlsx
- Supplementary-Table-S6.xlsx
- Supplementary_figures_rev.pdf
- Supplementary_Table-S1_rev.xlsx
- Supplementary_Table-S7.xlsx
