# Supplementary material for: Prognosis of Alzheimer’s Disease Using Quantitative Mass Spectrometry of Human Blood Plasma Proteins and Machine Learning
Source: Int J Mol Sci. 2022 Jul 18;23(14):7907. doi: 10.3390/ijms23147907 (PMC9318764; doi:10.3390/ijms23147907)
Supplement: Supplementary file 1 [file ijms-23-07907-s001.zip › Supplementary Table-S5_GO proteins annotation.xlsx]

## Sheet: enrichment_Pathways
#term ID	term description	observed gene count	background gene count	strength	false discovery rate	matching proteins in your network (labels)
HSA-114608	Platelet degranulation	10	127	1.7	1.7e-11	APOH,SERPINE1,ORM1,FGB,FGA,SERPINF2,FGG,FN1,GIG25,TF
HSA-1474244	Extracellular matrix organization	10	301	1.32	1.57e-08	SERPINE1,VTN,TIMP2,TNC,VCAM1,FGB,FGA,FBLN1,FGG,FN1
HSA-216083	Integrin cell surface interactions	7	85	1.72	4.15e-08	VTN,TNC,VCAM1,FGB,FGA,FGG,FN1
HSA-8957275	Post-translational protein phosphorylation	7	107	1.62	1.59e-07	APOE,TNC,FGA,FGG,FN1,CST3,TF
HSA-381426	Regulation of Insulin-like Growth Factor (IGF) transport and uptake by Insulin-like Growth Factor Binding Proteins (IGFBPs)	7	124	1.55	3.62e-07	APOE,TNC,FGA,FGG,FN1,CST3,TF
HSA-168249	Innate Immune System	12	1025	0.87	5.3e-06	LBP,C5,VTN,ORM1,TIMP2,CAMP,FGB,FGA,C1QB,FGG,GIG25,CST3
HSA-354194	SOS provides linkage to MAPK signaling for Integrins	4	15	2.23	5.3e-06	FGB,FGA,FGG,FN1
HSA-372708	p130Cas linkage to MAPK signaling for integrins	4	15	2.23	5.3e-06	FGB,FGA,FGG,FN1
HSA-5686938	Regulation of TLR by endogenous ligand	4	19	2.12	8.04e-06	LBP,FGB,FGA,FGG
HSA-8963898	Plasma lipoprotein assembly	4	19	2.12	8.04e-06	APOE,APOA4,APOC2,APOC4
HSA-6802948	Signaling by high-kinase activity BRAF mutants	4	36	1.85	6.51e-05	FGB,FGA,FGG,FN1
HSA-168256	Immune System	14	1956	0.65	7.08e-05	LBP,C5,VTN,ORM1,TIMP2,VCAM1,CAMP,FGB,FGA,C1QB,FGG,FN1,GIG25,CST3
HSA-5674135	MAP2K and MAPK activation	4	40	1.8	8.03e-05	FGB,FGA,FGG,FN1
HSA-9656223	Signaling by RAF1 mutants	4	41	1.79	8.34e-05	FGB,FGA,FGG,FN1
HSA-6802946	Signaling by moderate kinase activity BRAF mutants	4	45	1.75	0.00011	FGB,FGA,FGG,FN1
HSA-6802955	Paradoxical activation of RAF signaling by kinase inactive BRAF	4	45	1.75	0.00011	FGB,FGA,FGG,FN1
HSA-8963888	Chylomicron assembly	3	10	2.28	0.00011	APOE,APOA4,APOC2
HSA-8963901	Chylomicron remodeling	3	10	2.28	0.00011	APOE,APOA4,APOC2
HSA-9649948	Signaling downstream of RAS mutants	4	45	1.75	0.00011	FGB,FGA,FGG,FN1
HSA-6802952	Signaling by BRAF and RAF fusions	4	65	1.59	0.00034	FGB,FGA,FGG,FN1
HSA-3000178	ECM proteoglycans	4	76	1.52	0.00058	SERPINE1,VTN,TNC,FN1
HSA-140875	Common Pathway of Fibrin Clot Formation	3	22	1.93	0.0006	FGB,FGA,FGG
HSA-3000170	Syndecan interactions	3	27	1.85	0.00099	VTN,TNC,FN1
HSA-9029569	NR1H3 & NR1H2 regulate gene expression linked to cholesterol transport and efflux	3	37	1.71	0.0022	APOE,APOC2,APOC4
HSA-2129379	Molecules associated with elastic fibres	3	38	1.7	0.0023	VTN,FBLN1,FN1
HSA-975634	Retinoid metabolism and transport	3	44	1.63	0.0033	APOE,APOA4,APOC2
HSA-977606	Regulation of Complement cascade	3	47	1.61	0.0038	C5,VTN,C1QB
HSA-8964058	HDL remodeling	2	10	2.1	0.0078	APOE,APOC2
HSA-196854	Metabolism of vitamins and cofactors	4	189	1.13	0.0112	APOE,APOA4,BTD,APOC2
HSA-75205	Dissolution of Fibrin Clot	2	13	1.99	0.0119	SERPINE1,SERPINF2
HSA-977225	Amyloid fiber formation	3	78	1.39	0.013	FGA,APOA4,CST3
HSA-8963889	Assembly of active LPL and LIPC lipase complexes	2	19	1.82	0.0226	APOA4,APOC2
HSA-6785807	Interleukin-4 and Interleukin-13 signaling	3	107	1.25	0.03	LBP,VCAM1,FN1
HSA-6798695	Neutrophil degranulation	5	473	0.82	0.0362	ORM1,TIMP2,CAMP,GIG25,CST3

## Sheet: enrichment_KEGG
#term ID	term description	observed gene count	background gene count	strength	false discovery rate	matching proteins in your network (labels)
hsa04610	Complement and coagulation cascades	8	82	1.79	3.5e-10	SERPINE1,C5,VTN,FGB,FGA,C1QB,SERPINF2,FGG
hsa05150	Staphylococcus aureus infection	4	86	1.47	0.002	C5,CAMP,C1QB,FGG
hsa04979	Cholesterol metabolism	3	48	1.6	0.0079	APOH,APOE,APOA4
hsa04512	ECM-receptor interaction	3	88	1.33	0.0333	VTN,TNC,FN1
hsa04933	AGE-RAGE signaling pathway in diabetic complications	3	98	1.29	0.0361	SERPINE1,VCAM1,FN1
hsa04977	Vitamin digestion and absorption	2	24	1.72	0.043	APOA4,BTD
hsa04611	Platelet activation	3	122	1.19	0.048	FGB,FGA,FGG

## Sheet: enrichment_Processes
#term ID	term description	observed gene count	background gene count	false discovery rate	matching proteins in your network (labels)
2576	Platelet degranulation	10	129	1.17e-10	APOH,SERPINE1,ORM1,FGB,FGA,SERPINF2,FGG,FN1,GIG25,TF
30193	Regulation of blood coagulation	9	80	1.17e-10	APOH,SERPINE1,VTN,APOE,PRDX2,FGB,FGA,SERPINF2,FGG
30195	Negative regulation of blood coagulation	8	47	1.17e-10	APOH,SERPINE1,VTN,APOE,FGB,FGA,SERPINF2,FGG
30198	Extracellular matrix organization	11	338	3.51e-09	SERPINE1,VTN,TIMP2,TNC,VCAM1,FGB,FGA,SERPINF2,FBLN1,FGG,FN1
51241	Negative regulation of multicellular organismal process	16	1231	7.3e-09	APOH,LBP,SERPINE1,VTN,APOE,ORM1,PRDX2,FGB,FGA,SERPINF2,FBLN1,FGG,FN1,APOA4,CST3,APOC2
6952	Defense response	16	1296	1.47e-08	LBP,SERPINE1,C5,ORM1,ATRN,VCAM1,CAMP,PRDX2,FGB,FGA,C1QB,SERPINF2,FN1,APOA4,GIG25,CST3
45055	Regulated exocytosis	13	697	1.51e-08	APOH,SERPINE1,ORM1,TIMP2,CAMP,FGB,FGA,SERPINF2,FGG,FN1,GIG25,CST3,TF
6950	Response to stress	22	3485	9.26e-08	APOH,LBP,SERPINE1,C5,APOE,ORM1,ATRN,TNC,VCAM1,CAMP,PRDX2,FGB,FGA,C1QB,SERPINF2,FBLN1,FGG,FN1,APOA4,GIG25,CST3,TF
32102	Negative regulation of response to external stimulus	10	367	1.29e-07	APOH,SERPINE1,C5,VTN,APOE,PRDX2,FGB,FGA,SERPINF2,FGG
51239	Regulation of multicellular organismal process	21	3227	1.98e-07	APOH,LBP,SERPINE1,C5,VTN,APOE,ORM1,TIMP2,ATRN,CAMP,PRDX2,FGB,FGA,SERPINF2,FBLN1,FGG,FN1,APOA4,CST3,TF,APOC2
42730	Fibrinolysis	5	20	2.24e-07	SERPINE1,FGB,FGA,SERPINF2,FGG
52547	Regulation of peptidase activity	10	449	6.81e-07	SERPINE1,C5,VTN,PZP,TIMP2,SERPINF2,FBLN1,FN1,GIG25,CST3
72378	Blood coagulation, fibrin clot formation	5	26	6.81e-07	APOH,FGB,FGA,FBLN1,FGG
51240	Positive regulation of multicellular organismal process	16	1770	8.36e-07	APOH,LBP,SERPINE1,C5,APOE,ORM1,TIMP2,CAMP,PRDX2,FGB,FGA,SERPINF2,FGG,FN1,TF,APOC2
16192	Vesicle-mediated transport	16	1805	1.03e-06	APOH,LBP,SERPINE1,VTN,APOE,ORM1,TIMP2,CAMP,FGB,FGA,SERPINF2,FGG,FN1,GIG25,CST3,TF
50878	Regulation of body fluid levels	10	509	1.86e-06	APOH,SERPINE1,VTN,APOE,PRDX2,FGB,FGA,SERPINF2,FBLN1,FGG
10951	Negative regulation of endopeptidase activity	8	248	1.96e-06	SERPINE1,C5,VTN,PZP,TIMP2,SERPINF2,GIG25,CST3
30155	Regulation of cell adhesion	11	712	2.68e-06	SERPINE1,VTN,TNC,VCAM1,PRDX2,FGB,FGA,SERPINF2,FBLN1,FGG,FN1
31639	Plasminogen activation	4	11	2.68e-06	APOH,FGB,FGA,FGG
43408	Regulation of mapk cascade	11	725	3.04e-06	C5,APOE,TIMP2,PRDX2,FGB,FGA,SERPINF2,FBLN1,FGG,FN1,TF
30162	Regulation of proteolysis	11	747	4.01e-06	SERPINE1,C5,VTN,APOE,PZP,TIMP2,SERPINF2,FBLN1,FN1,GIG25,CST3
6953	Acute-phase response	5	44	4.45e-06	LBP,ORM1,SERPINF2,FN1,GIG25
48518	Positive regulation of biological process	25	6112	7.03e-06	APOH,LBP,PON1,SERPINE1,C5,VTN,APOE,ORM1,TIMP2,TNC,VCAM1,CAMP,PRDX2,FGB,FGA,C1QB,SERPINF2,FBLN1,FGG,FN1,APOA4,CST3,TF,APOC2,APOC4
51336	Regulation of hydrolase activity	13	1284	9.72e-06	APOH,SERPINE1,C5,VTN,PZP,TIMP2,SERPINF2,FBLN1,FN1,APOA4,GIG25,CST3,APOC2
10810	Regulation of cell-substrate adhesion	7	212	1.33e-05	SERPINE1,VTN,FGB,FGA,FBLN1,FGG,FN1
10811	Positive regulation of cell-substrate adhesion	6	124	1.53e-05	VTN,FGB,FGA,FBLN1,FGG,FN1
90303	Positive regulation of wound healing	5	59	1.54e-05	APOH,SERPINE1,VTN,PRDX2,SERPINF2
7160	Cell-matrix adhesion	6	127	1.67e-05	VTN,VCAM1,FGB,FGA,FGG,FN1
6954	Inflammatory response	9	515	2.22e-05	LBP,C5,ORM1,ATRN,CAMP,PRDX2,SERPINF2,FN1,GIG25
9893	Positive regulation of metabolic process	20	3893	2.31e-05	LBP,SERPINE1,C5,VTN,APOE,ORM1,TIMP2,TNC,CAMP,PRDX2,FGB,FGA,SERPINF2,FBLN1,FGG,FN1,APOA4,CST3,TF,APOC2
43410	Positive regulation of mapk cascade	9	543	3.23e-05	C5,APOE,TIMP2,PRDX2,FGB,FGA,SERPINF2,FGG,TF
50790	Regulation of catalytic activity	16	2386	3.23e-05	APOH,SERPINE1,C5,VTN,APOE,PZP,TIMP2,PRDX2,SERPINF2,FBLN1,FN1,APOA4,GIG25,CST3,TF,APOC2
34377	Plasma lipoprotein particle assembly	4	27	3.94e-05	APOE,APOA4,APOC2,APOC4
30194	Positive regulation of blood coagulation	4	28	4.41e-05	APOH,SERPINE1,PRDX2,SERPINF2
2376	Immune system process	16	2481	4.83e-05	LBP,C5,VTN,ORM1,TIMP2,VCAM1,CAMP,PRDX2,FGB,FGA,C1QB,FN1,APOA4,GIG25,CST3,TF
2000352	Negative regulation of endothelial cell apoptotic process	4	29	4.83e-05	SERPINE1,FGB,FGA,FGG
32101	Regulation of response to external stimulus	11	1013	5.37e-05	APOH,LBP,SERPINE1,C5,VTN,APOE,PRDX2,FGB,FGA,SERPINF2,FGG
45785	Positive regulation of cell adhesion	8	423	5.64e-05	VTN,VCAM1,FGB,FGA,SERPINF2,FBLN1,FGG,FN1
43086	Negative regulation of catalytic activity	10	807	6.32e-05	SERPINE1,C5,VTN,APOE,PZP,TIMP2,SERPINF2,GIG25,CST3,APOC2
6955	Immune response	13	1588	7.14e-05	LBP,C5,VTN,ORM1,TIMP2,VCAM1,CAMP,FGB,FGA,C1QB,APOA4,GIG25,CST3
70372	Regulation of erk1 and erk2 cascade	7	292	7.14e-05	APOE,FGB,FGA,SERPINF2,FBLN1,FGG,FN1
44419	Interspecies interaction between organisms	14	1899	7.29e-05	LBP,SERPINE1,C5,APOE,VCAM1,CAMP,PRDX2,FGB,FGA,C1QB,FBLN1,FN1,APOA4,TF
70328	Triglyceride homeostasis	4	35	8.01e-05	APOE,APOA4,APOC2,APOC4
1775	Cell activation	11	1075	8.2e-05	LBP,ORM1,TIMP2,VCAM1,CAMP,PRDX2,FGB,FGA,FGG,GIG25,CST3
51248	Negative regulation of protein metabolic process	11	1096	9.7e-05	SERPINE1,C5,VTN,APOE,PZP,TIMP2,FGA,SERPINF2,FBLN1,GIG25,CST3
6810	Transport	20	4353	0.0001	APOH,LBP,SERPINE1,VTN,AFM,APOE,ORM1,TIMP2,CAMP,FGB,FGA,SERPINF2,FGG,FN1,APOA4,GIG25,CST3,TF,APOC2,APOC4
9605	Response to external stimulus	15	2310	0.0001	LBP,PON1,SERPINE1,C5,APOE,TNC,VCAM1,CAMP,PRDX2,FGB,FGA,C1QB,APOA4,CST3,TF
32268	Regulation of cellular protein metabolic process	16	2693	0.00011	SERPINE1,C5,VTN,APOE,PZP,TIMP2,PRDX2,FGB,FGA,SERPINF2,FBLN1,FGG,FN1,GIG25,CST3,TF
1902042	Negative regulation of extrinsic apoptotic signaling pathway via death domain receptors	4	39	0.00011	SERPINE1,FGB,FGA,FGG
32879	Regulation of localization	16	2740	0.00013	APOH,LBP,PON1,SERPINE1,C5,VTN,APOE,FGB,FGA,FBLN1,FGG,FN1,APOA4,TF,APOC2,APOC4
34371	Chylomicron remodeling	3	9	0.00013	APOE,APOA4,APOC2
34372	Very-low-density lipoprotein particle remodeling	3	9	0.00013	APOE,APOA4,APOC2
2001237	Negative regulation of extrinsic apoptotic signaling pathway	5	106	0.00013	SERPINE1,PRDX2,FGB,FGA,FGG
10604	Positive regulation of macromolecule metabolic process	18	3600	0.00015	LBP,SERPINE1,C5,VTN,APOE,ORM1,TIMP2,TNC,CAMP,PRDX2,FGB,FGA,SERPINF2,FBLN1,FGG,FN1,CST3,TF
34378	Chylomicron assembly	3	10	0.00015	APOE,APOA4,APOC2
44092	Negative regulation of molecular function	11	1163	0.00015	SERPINE1,C5,VTN,APOE,PZP,TIMP2,PRDX2,SERPINF2,GIG25,CST3,APOC2
45937	Positive regulation of phosphate metabolic process	11	1164	0.00015	C5,VTN,APOE,TIMP2,PRDX2,FGB,FGA,SERPINF2,FGG,TF,APOC2
51006	Positive regulation of lipoprotein lipase activity	3	10	0.00015	APOH,APOA4,APOC2
51918	Negative regulation of fibrinolysis	3	10	0.00015	APOH,SERPINE1,SERPINF2
1932	Regulation of protein phosphorylation	12	1459	0.00016	C5,VTN,APOE,TIMP2,PRDX2,FGB,FGA,SERPINF2,FBLN1,FGG,FN1,TF
43687	Post-translational protein modification	7	360	0.00018	APOE,TNC,FGA,FGG,FN1,CST3,TF
50896	Response to stimulus	26	8046	0.00018	APOH,LBP,PON1,SERPINE1,C5,VTN,APOE,ORM1,TIMP2,ATRN,TNC,VCAM1,CAMP,PRDX2,FGB,FGA,C1QB,SERPINF2,FBLN1,FGG,FN1,APOA4,GIG25,CST3,TF,APOC2
51179	Localization	22	5591	0.00018	APOH,LBP,SERPINE1,C5,VTN,AFM,APOE,ORM1,TIMP2,VCAM1,CAMP,FGB,FGA,SERPINF2,FGG,FN1,APOA4,GIG25,CST3,TF,APOC2,APOC4
9611	Response to wounding	8	532	0.00019	APOH,TNC,FGB,FGA,FBLN1,FGG,FN1,CST3
10035	Response to inorganic substance	8	538	0.0002	PON1,PRDX2,FGB,FGA,FGG,APOA4,CST3,TF
19220	Regulation of phosphate metabolic process	13	1816	0.00021	C5,VTN,APOE,TIMP2,PRDX2,FGB,FGA,SERPINF2,FBLN1,FGG,FN1,TF,APOC2
33700	Phospholipid efflux	3	12	0.00021	APOE,APOA4,APOC2
32374	Regulation of cholesterol transport	4	52	0.00022	PON1,APOE,APOA4,APOC2
60627	Regulation of vesicle-mediated transport	8	550	0.00022	SERPINE1,VTN,APOE,FGB,FGA,FGG,TF,APOC2
1900024	Regulation of substrate adhesion-dependent cell spreading	4	53	0.00023	FGB,FGA,FBLN1,FGG
51707	Response to other organism	11	1256	0.00024	LBP,SERPINE1,C5,VCAM1,CAMP,PRDX2,FGB,FGA,C1QB,APOA4,TF
32501	Multicellular organismal process	24	6933	0.00026	APOH,SERPINE1,VTN,APOE,PZP,TIMP2,ATRN,TNC,VCAM1,PRDX2,FGB,FGA,C1QB,SERPINF2,FBLN1,FGG,FN1,APOA4,GIG25,CST3,TF,BTD,APOC2,APOC4
1934	Positive regulation of protein phosphorylation	10	1019	0.00028	C5,VTN,APOE,TIMP2,PRDX2,FGB,FGA,SERPINF2,FGG,TF
32269	Negative regulation of cellular protein metabolic process	10	1043	0.00033	SERPINE1,C5,VTN,APOE,PZP,TIMP2,SERPINF2,FBLN1,GIG25,CST3
48584	Positive regulation of response to stimulus	14	2257	0.00033	APOH,LBP,SERPINE1,C5,VTN,APOE,TIMP2,PRDX2,FGB,FGA,C1QB,SERPINF2,FGG,TF
97746	Regulation of blood vessel diameter	5	139	0.00033	APOE,FGB,FGA,SERPINF2,FGG
34116	Positive regulation of heterotypic cell-cell adhesion	3	16	0.00037	FGB,FGA,FGG
32270	Positive regulation of cellular protein metabolic process	12	1635	0.00039	C5,VTN,APOE,TIMP2,PRDX2,FGB,FGA,SERPINF2,FBLN1,FGG,FN1,TF
48519	Negative regulation of biological process	21	5389	0.00039	APOH,LBP,SERPINE1,C5,VTN,APOE,ORM1,PZP,TIMP2,TNC,PRDX2,FGB,FGA,SERPINF2,FBLN1,FGG,FN1,APOA4,GIG25,CST3,APOC2
48585	Negative regulation of response to stimulus	12	1636	0.00039	APOH,SERPINE1,C5,VTN,APOE,TIMP2,PRDX2,FGB,FGA,SERPINF2,FBLN1,FGG
43691	Reverse cholesterol transport	3	17	0.00041	APOE,APOA4,APOC2
1905952	Regulation of lipid localization	5	151	0.00044	PON1,APOE,APOA4,APOC2,APOC4
34375	High-density lipoprotein particle remodeling	3	18	0.00047	APOE,APOA4,APOC2
42060	Wound healing	7	439	0.00049	APOH,TNC,FGB,FGA,FBLN1,FGG,FN1
51649	Establishment of localization in cell	14	2375	0.00053	APOH,SERPINE1,APOE,ORM1,TIMP2,CAMP,FGB,FGA,SERPINF2,FGG,FN1,GIG25,CST3,TF
6869	Lipid transport	6	296	0.00066	APOH,LBP,APOE,APOA4,APOC2,APOC4
80134	Regulation of response to stress	11	1437	0.0007	APOH,LBP,SERPINE1,VTN,APOE,PRDX2,FGB,FGA,SERPINF2,FGG,TF
98542	Defense response to other organism	9	900	0.00072	LBP,SERPINE1,C5,VCAM1,CAMP,FGB,FGA,C1QB,APOA4
10769	Regulation of cell morphogenesis involved in differentiation	6	309	0.0008	APOE,FGB,FGA,FBLN1,FGG,FN1
33344	Cholesterol efflux	3	23	0.00084	APOE,APOA4,APOC2
2000145	Regulation of cell motility	9	929	0.0009	APOH,LBP,SERPINE1,C5,VTN,APOE,FBLN1,FN1,TF
45087	Innate immune response	8	703	0.00099	LBP,C5,VCAM1,CAMP,FGB,FGA,C1QB,APOA4
44093	Positive regulation of molecular function	12	1842	0.0011	APOH,PON1,C5,VTN,APOE,TIMP2,PRDX2,FBLN1,FN1,APOA4,TF,APOC2
51258	Protein polymerization	4	87	0.0011	VTN,FGB,FGA,FGG
2252	Immune effector process	9	969	0.0012	LBP,C5,ORM1,TIMP2,CAMP,PRDX2,C1QB,GIG25,CST3
1817	Regulation of cytokine production	8	742	0.0013	LBP,SERPINE1,C5,ORM1,CAMP,SERPINF2,FBLN1,FN1
31325	Positive regulation of cellular metabolic process	16	3413	0.0013	SERPINE1,C5,VTN,APOE,TIMP2,PRDX2,FGB,FGA,SERPINF2,FBLN1,FGG,FN1,APOA4,CST3,TF,APOC2
42221	Response to chemical	18	4333	0.0014	LBP,PON1,SERPINE1,C5,APOE,TIMP2,TNC,VCAM1,PRDX2,FGB,FGA,SERPINF2,FGG,FN1,APOA4,CST3,TF,APOC2
30100	Regulation of endocytosis	5	205	0.0015	SERPINE1,VTN,APOE,TF,APOC2
60548	Negative regulation of cell death	9	999	0.0015	APOH,SERPINE1,APOE,PRDX2,FGB,FGA,FGG,FN1,CST3
48523	Negative regulation of cellular process	19	4874	0.0016	APOH,SERPINE1,C5,VTN,APOE,PZP,TIMP2,TNC,PRDX2,FGB,FGA,SERPINF2,FBLN1,FGG,FN1,APOA4,GIG25,CST3,APOC2
70374	Positive regulation of erk1 and erk2 cascade	5	209	0.0016	APOE,FGB,FGA,SERPINF2,FGG
2224	Toll-like receptor signaling pathway	4	100	0.0017	LBP,FGB,FGA,FGG
45807	Positive regulation of endocytosis	4	103	0.0018	SERPINE1,VTN,APOE,TF
45907	Positive regulation of vasoconstriction	3	32	0.0018	FGB,FGA,FGG
48259	Regulation of receptor-mediated endocytosis	4	102	0.0018	SERPINE1,VTN,TF,APOC2
1904237	Positive regulation of substrate-dependent cell migration, cell attachment to substrate	2	3	0.0019	FBLN1,FN1
9892	Negative regulation of metabolic process	15	3124	0.002	LBP,SERPINE1,C5,VTN,APOE,ORM1,PZP,TIMP2,FGA,SERPINF2,FBLN1,FN1,GIG25,CST3,APOC2
9967	Positive regulation of signal transduction	11	1654	0.0021	LBP,C5,VTN,APOE,TIMP2,PRDX2,FGB,FGA,SERPINF2,FGG,TF
65008	Regulation of biological quality	17	4042	0.0022	APOH,SERPINE1,VTN,AFM,APOE,PRDX2,FGB,FGA,SERPINF2,FBLN1,FGG,FN1,APOA4,GIG25,TF,APOC2,APOC4
22603	Regulation of anatomical structure morphogenesis	9	1095	0.0027	APOH,SERPINE1,APOE,FGB,FGA,FBLN1,FGG,FN1,CST3
48583	Regulation of response to stimulus	17	4114	0.0027	APOH,LBP,SERPINE1,C5,VTN,APOE,TIMP2,VCAM1,PRDX2,FGB,FGA,C1QB,SERPINF2,FBLN1,FGG,FN1,TF
90207	Regulation of triglyceride metabolic process	3	38	0.0027	APOE,APOA4,APOC2
1900026	Positive regulation of substrate adhesion-dependent cell spreading	3	38	0.0027	FGB,FGA,FGG
71634	Regulation of transforming growth factor beta production	3	39	0.0028	SERPINF2,FBLN1,FN1
34381	Plasma lipoprotein particle clearance	3	40	0.003	APOE,APOC2,APOC4
10605	Negative regulation of macromolecule metabolic process	14	2875	0.0034	LBP,SERPINE1,C5,VTN,APOE,ORM1,PZP,TIMP2,FGA,SERPINF2,FBLN1,FN1,GIG25,CST3
30334	Regulation of cell migration	8	865	0.0034	APOH,LBP,SERPINE1,C5,VTN,APOE,FBLN1,FN1
70527	Platelet aggregation	3	42	0.0034	FGB,FGA,FGG
9617	Response to bacterium	7	634	0.0035	LBP,SERPINE1,CAMP,PRDX2,FGB,FGA,TF
22407	Regulation of cell-cell adhesion	6	424	0.0035	VCAM1,PRDX2,FGB,FGA,SERPINF2,FGG
2443	Leukocyte mediated immunity	7	641	0.0038	C5,ORM1,TIMP2,CAMP,C1QB,GIG25,CST3
43066	Negative regulation of apoptotic process	8	893	0.0041	APOH,SERPINE1,APOE,PRDX2,FGB,FGA,FGG,FN1
19222	Regulation of metabolic process	22	6948	0.0043	LBP,SERPINE1,C5,VTN,APOE,ORM1,PZP,TIMP2,TNC,CAMP,PRDX2,FGB,FGA,SERPINF2,FBLN1,FGG,FN1,APOA4,GIG25,CST3,TF,APOC2
10757	Negative regulation of plasminogen activation	2	6	0.0045	SERPINE1,SERPINF2
22409	Positive regulation of cell-cell adhesion	5	272	0.0045	VCAM1,FGB,FGA,SERPINF2,FGG
34447	Very-low-density lipoprotein particle clearance	2	6	0.0045	APOE,APOC4
43085	Positive regulation of catalytic activity	10	1489	0.0045	APOH,C5,APOE,TIMP2,PRDX2,FBLN1,FN1,APOA4,TF,APOC2
43152	Induction of bacterial agglutination	2	6	0.0045	FGB,FGA
6959	Humoral immune response	5	275	0.0046	C5,CAMP,FGB,FGA,C1QB
7155	Cell adhesion	8	925	0.0048	VTN,TNC,VCAM1,FGB,FGA,FGG,FN1,APOA4
42742	Defense response to bacterium	5	277	0.0048	LBP,SERPINE1,CAMP,FGB,FGA
51050	Positive regulation of transport	8	923	0.0048	PON1,SERPINE1,VTN,APOE,FGB,FGA,FGG,TF
2000146	Negative regulation of cell motility	5	278	0.0048	APOH,SERPINE1,C5,APOE,FBLN1
1819	Positive regulation of cytokine production	6	461	0.0049	LBP,SERPINE1,C5,ORM1,CAMP,SERPINF2
7162	Negative regulation of cell adhesion	5	280	0.0049	SERPINE1,TNC,PRDX2,FBLN1,FGG
45321	Leukocyte activation	8	929	0.0049	LBP,ORM1,TIMP2,VCAM1,CAMP,PRDX2,GIG25,CST3
65007	Biological regulation	29	12171	0.0049	APOH,LBP,PON1,SERPINE1,C5,VTN,AFM,APOE,ORM1,PZP,TIMP2,ATRN,TNC,VCAM1,CAMP,PRDX2,FGB,FGA,C1QB,SERPINF2,FBLN1,FGG,FN1,APOA4,GIG25,CST3,TF,APOC2,APOC4
48260	Positive regulation of receptor-mediated endocytosis	3	53	0.0057	SERPINE1,VTN,TF
50793	Regulation of developmental process	13	2648	0.0059	APOH,SERPINE1,APOE,TIMP2,ATRN,PRDX2,FGB,FGA,SERPINF2,FBLN1,FGG,FN1,CST3
32757	Positive regulation of interleukin-8 production	3	55	0.0063	LBP,SERPINE1,CAMP
30449	Regulation of complement activation	3	56	0.0065	C5,VTN,C1QB
34382	Chylomicron remnant clearance	2	8	0.0065	APOE,APOC2
9966	Regulation of signal transduction	14	3107	0.0068	LBP,SERPINE1,C5,VTN,APOE,TIMP2,PRDX2,FGB,FGA,SERPINF2,FBLN1,FGG,FN1,TF
10770	Positive regulation of cell morphogenesis involved in differentiation	4	159	0.0069	FGB,FGA,FGG,FN1
50789	Regulation of biological process	28	11475	0.0069	APOH,LBP,PON1,SERPINE1,C5,VTN,APOE,ORM1,PZP,TIMP2,ATRN,TNC,VCAM1,CAMP,PRDX2,FGB,FGA,C1QB,SERPINF2,FBLN1,FGG,FN1,APOA4,GIG25,CST3,TF,APOC2,APOC4
45597	Positive regulation of cell differentiation	8	993	0.007	SERPINE1,APOE,TIMP2,FGB,FGA,SERPINF2,FGG,FN1
19731	Antibacterial humoral response	3	59	0.0071	CAMP,FGB,FGA
65003	Protein-containing complex assembly	9	1293	0.0072	VTN,APOE,FGB,FGA,FGG,FN1,APOA4,APOC2,APOC4
10873	Positive regulation of cholesterol esterification	2	9	0.0073	APOE,APOA4
10898	Positive regulation of triglyceride catabolic process	2	9	0.0073	APOA4,APOC2
90066	Regulation of anatomical structure size	6	516	0.0079	APOE,FGB,FGA,SERPINF2,FGG,FN1
48522	Positive regulation of cellular process	19	5579	0.008	LBP,SERPINE1,C5,VTN,APOE,TIMP2,TNC,VCAM1,PRDX2,FGB,FGA,SERPINF2,FBLN1,FGG,FN1,APOA4,CST3,TF,APOC2
2275	Myeloid cell activation involved in immune response	6	522	0.0084	LBP,ORM1,TIMP2,CAMP,GIG25,CST3
34384	High-density lipoprotein particle clearance	2	10	0.0085	APOE,APOC2
2000147	Positive regulation of cell motility	6	547	0.0107	LBP,SERPINE1,VTN,FBLN1,FN1,TF
10720	Positive regulation of cell development	6	556	0.0115	APOE,TIMP2,FGB,FGA,FGG,FN1
71635	Negative regulation of transforming growth factor beta production	2	12	0.0115	FBLN1,FN1
19430	Removal of superoxide radicals	2	13	0.013	PRDX2,APOA4
34380	High-density lipoprotein particle assembly	2	13	0.013	APOE,APOA4
70887	Cellular response to chemical stimulus	13	2919	0.0135	LBP,SERPINE1,C5,APOE,TNC,VCAM1,PRDX2,FGB,FGG,FN1,APOA4,CST3,TF
302	Response to reactive oxygen species	4	198	0.014	APOE,PRDX2,APOA4,CST3
32375	Negative regulation of cholesterol transport	2	14	0.0143	APOE,APOC2
51049	Regulation of transport	10	1776	0.0143	PON1,SERPINE1,VTN,APOE,FGB,FGA,FGG,APOA4,TF,APOC2
60255	Regulation of macromolecule metabolic process	20	6407	0.0144	LBP,SERPINE1,C5,VTN,APOE,ORM1,PZP,TIMP2,TNC,CAMP,PRDX2,FGB,FGA,SERPINF2,FBLN1,FGG,FN1,GIG25,CST3,TF
42632	Cholesterol homeostasis	3	85	0.0175	APOE,APOA4,APOC2
46889	Positive regulation of lipid biosynthetic process	3	85	0.0175	APOE,APOA4,APOC2
10033	Response to organic substance	13	3011	0.0176	LBP,PON1,SERPINE1,TIMP2,TNC,VCAM1,PRDX2,FGB,SERPINF2,FGG,FN1,APOA4,CST3
6979	Response to oxidative stress	5	393	0.0179	APOE,ATRN,PRDX2,APOA4,CST3
65009	Regulation of molecular function	17	4913	0.0188	APOH,PON1,SERPINE1,C5,VTN,APOE,PZP,TIMP2,PRDX2,SERPINF2,FBLN1,FN1,APOA4,GIG25,CST3,TF,APOC2
9636	Response to toxic substance	4	219	0.0191	PON1,APOE,PRDX2,APOA4
16043	Cellular component organization	18	5447	0.0192	SERPINE1,VTN,APOE,TIMP2,TNC,VCAM1,FGB,FGA,C1QB,SERPINF2,FBLN1,FGG,FN1,APOA4,CST3,TF,APOC2,APOC4
2682	Regulation of immune system process	9	1514	0.0197	LBP,SERPINE1,C5,VTN,APOE,ORM1,VCAM1,PRDX2,C1QB
45595	Regulation of cell differentiation	10	1874	0.0204	SERPINE1,APOE,TIMP2,PRDX2,FGB,FGA,SERPINF2,FBLN1,FGG,FN1
45921	Positive regulation of exocytosis	3	92	0.0206	FGB,FGA,FGG
51702	Interaction with symbiont	3	93	0.021	APOE,CAMP,FN1
1905954	Positive regulation of lipid localization	3	93	0.021	PON1,APOE,APOC4
10544	Negative regulation of platelet activation	2	19	0.0223	APOE,FGG
50829	Defense response to gram-negative bacterium	3	98	0.0238	LBP,SERPINE1,CAMP
1901700	Response to oxygen-containing compound	9	1567	0.024	LBP,PON1,SERPINE1,APOE,TNC,VCAM1,PRDX2,APOA4,CST3
10875	Positive regulation of cholesterol efflux	2	20	0.0241	PON1,APOE
43067	Regulation of programmed cell death	9	1569	0.0241	APOH,SERPINE1,APOE,PRDX2,FGB,FGA,FGG,FN1,CST3
90277	Positive regulation of peptide hormone secretion	3	100	0.0248	FGB,FGA,FGG
45723	Positive regulation of fatty acid biosynthetic process	2	21	0.026	APOA4,APOC2
10628	Positive regulation of gene expression	11	2337	0.0263	LBP,SERPINE1,C5,APOE,ORM1,TNC,CAMP,SERPINF2,FBLN1,FN1,TF
60284	Regulation of cell development	7	956	0.0271	APOE,TIMP2,FGB,FGA,FBLN1,FGG,FN1
9968	Negative regulation of signal transduction	8	1271	0.0279	SERPINE1,APOE,TIMP2,PRDX2,FGB,FGA,FBLN1,FGG
1523	Retinoid metabolic process	3	108	0.03	APOE,APOA4,APOC2
51173	Positive regulation of nitrogen compound metabolic process	13	3239	0.0315	SERPINE1,C5,VTN,APOE,TIMP2,PRDX2,FGB,FGA,SERPINF2,FBLN1,FGG,FN1,TF
42127	Regulation of cell population proliferation	9	1642	0.0321	APOH,APOE,TIMP2,TNC,VCAM1,SERPINF2,FBLN1,FN1,CST3
51043	Regulation of membrane protein ectodomain proteolysis	2	24	0.0322	APOE,TIMP2
30336	Negative regulation of cell migration	4	262	0.0326	APOH,SERPINE1,C5,APOE
2227	Innate immune response in mucosa	2	26	0.0369	CAMP,APOA4
9991	Response to extracellular stimulus	5	483	0.0384	PON1,APOE,TNC,VCAM1,CST3
43312	Neutrophil degranulation	5	484	0.0387	ORM1,TIMP2,CAMP,GIG25,CST3
8203	Cholesterol metabolic process	3	120	0.039	PON1,APOE,APOA4
1818	Negative regulation of cytokine production	4	280	0.0403	LBP,ORM1,FBLN1,FN1
42744	Hydrogen peroxide catabolic process	2	28	0.0413	PRDX2,APOA4
2688	Regulation of leukocyte chemotaxis	3	124	0.0416	LBP,SERPINE1,C5
1901701	Cellular response to oxygen-containing compound	7	1055	0.0438	LBP,SERPINE1,TNC,VCAM1,PRDX2,APOA4,CST3
98609	Cell-cell adhesion	5	505	0.044	VCAM1,FGB,FGA,FGG,APOA4
34614	Cellular response to reactive oxygen species	3	133	0.0482	PRDX2,APOA4,CST3
30335	Positive regulation of cell migration	5	522	0.0494	LBP,SERPINE1,VTN,FBLN1,FN1

## Sheet: enrichment_Functions
#term ID	term description	observed gene count	background gene count	false discovery rate	matching proteins in your network (labels)
61134	Peptidase regulator activity	9	226	2.28e-07	SERPINE1,C5,PZP,TIMP2,SERPINF2,FBLN1,FN1,GIG25,CST3
5201	Extracellular matrix structural constituent	7	119	1.44e-06	VTN,TNC,FGB,FGA,FBLN1,FGG,FN1
30234	Enzyme regulator activity	13	1044	2.73e-06	APOH,SERPINE1,C5,APOE,PZP,TIMP2,SERPINF2,FBLN1,FN1,APOA4,GIG25,CST3,APOC2
4866	Endopeptidase inhibitor activity	7	181	1.17e-05	SERPINE1,C5,PZP,TIMP2,SERPINF2,GIG25,CST3
2020	Protease binding	6	138	4.15e-05	SERPINE1,PZP,TIMP2,SERPINF2,FN1,CST3
4857	Enzyme inhibitor activity	8	377	4.44e-05	SERPINE1,C5,PZP,TIMP2,SERPINF2,GIG25,CST3,APOC2
5102	Signaling receptor binding	13	1581	0.00012	LBP,SERPINE1,C5,VTN,APOE,TIMP2,VCAM1,FGB,FGA,FBLN1,FGG,FN1,TF
5178	Integrin binding	5	147	0.0012	VTN,TIMP2,VCAM1,FBLN1,FN1
5198	Structural molecule activity	8	635	0.0015	VTN,APOE,TNC,FGB,FGA,FBLN1,FGG,FN1
4867	Serine-type endopeptidase inhibitor activity	4	98	0.0053	SERPINE1,PZP,SERPINF2,GIG25
8289	Lipid binding	8	764	0.0053	APOH,LBP,PON1,AFM,APOE,CAMP,APOA4,APOC2
60230	Lipoprotein lipase activator activity	2	3	0.0056	APOH,APOC2
43394	Proteoglycan binding	3	37	0.0073	APOE,TNC,FN1
4064	Arylesterase activity	2	6	0.0136	APMAP,PON1
60228	Phosphatidylcholine-sterol o-acyltransferase activator activity	2	6	0.0136	APOE,APOA4
42802	Identical protein binding	11	1896	0.0174	APOH,PON1,VTN,APOE,SERPINF2,FBLN1,FGG,FN1,APOA4,CST3,APOC2
8047	Enzyme activator activity	6	520	0.0257	APOH,APOE,FBLN1,FN1,APOA4,APOC2
8201	Heparin binding	4	172	0.0265	APOH,VTN,APOE,FN1
50839	Cell adhesion molecule binding	6	538	0.028	VTN,TIMP2,VCAM1,FBLN1,FGG,FN1
16209	Antioxidant activity	3	74	0.0356	APOE,PRDX2,APOA4
5515	Protein binding	21	7026	0.0427	APOH,LBP,PON1,SERPINE1,C5,VTN,APOE,PZP,TIMP2,TNC,VCAM1,FGB,FGA,SERPINF2,FBLN1,FGG,FN1,APOA4,CST3,TF,APOC2
