# Supplementary material for: Prognosis of Alzheimer’s Disease Using Quantitative Mass Spectrometry of Human Blood Plasma Proteins and Machine Learning
Source: Int J Mol Sci. 2022 Jul 18;23(14):7907. doi: 10.3390/ijms23147907 (PMC9318764; doi:10.3390/ijms23147907)
Supplement: Supplementary file 1 [file ijms-23-07907-s001.zip › Supplementary-Table-S2_rev.xlsx]

## Sheet: Table S2
									CBs reproduced in at least 3 independent cohorts
	Supplementary Table S2. Results of quantitative and statistical analysis.								CBs reproduced in 1 or 2 independent cohorts
	Proteins are ordered by decrease of their feature importance								p-values <0.05
	* The decrease (↓) or increase (↑) in a level is shown only for proteins with p<0.05. The background indicates completely consistent results with other studies.														Determined concentrations (fmol/μL)
												Quantitation Range (fmol/μL)			MCI group
	Feature	Abbr.	UniProt ID	Regulation level*	Reference	Feature importance (Random forest)	p-value	FDR Benjamini-Hochberg	Cohen’s d			LLOQ	ULOQ	Peptide	1	1(2)	2	2(2)	6	6(2)	8	8(2)	8A	8A(2)	9	9(2)	10	10(2)	12	12(2)	14	14(2)	15	15(2)	18	18(2)	19	19(2)	20	20(2)	21	21(2)	32	32(2)	36	36(2)	36A	36A(2)	36B
1	Afamin	AFAM	P43652	↓	[26]	0.03176543858311713	0.0001670831421960313	0.016207064793015036	0.839743687291012			31.6336	32337.5	DADPDTFFAK	211.74	198.62	280.03	278.66	356.44	366.72	266.52	276.43	248.1	249.07	263.91	246.59	233.37	244.94	355.08	341.58	237.86	244.07	286.77	306.15	223.53	210.86	342.01	348.9	263.17	270.87	276.7	277.66	408.71	421.57	295.53	299.26	282.78	264.8	246.2
2	Apolipoprotein E	APOE	P02649	↓	[25]	0.03101715075928559	0.0031122111564145702	0.08821866383360837	0.6007457584486213			14.9849	15128	LGPLVEQGR	257.95	262.45	388.61	390.76	804.9	812.24	612.18	629.65	619.74	613.68	655.27	688.69	317.62	333.01	914.26	921.51	528.5	494.33	319.11	318.38	444.57	476.66	323.95	318.25	558.01	545	380.77	402.57	709.93	727.67	414.09	418.69	376.96	381.77	384.95
3	Serum paraoxonase/arylesterase 1	PON1	P27169	↓	[25,26]	0.025681411076881374	0.003637883044684881	0.08821866383360837	0.6045286130931756			46.728	46106.9	IFFYDSENPPASEVLR	413.12	376.68	827.33	847.36	996.55	994.78	587.62	560.61	600.37	609.65	763.71	778.05	711.88	729.79	925.27	919.6	561.51	549.1	435.43	424.9	408.07	392.99	544.25	505.43	715.13	679.91	402.3	422.76	543.63	554.93	682.58	678.25	615.48	650.59	567.24
4	Fibrinogen beta chain	FGB	P02675	↑	[25,26]	0.02202916376410518	0.0191536030104865	0.14922096977892	-0.3386993149061701			35.1416	34816.3	HQLYIDETVNSNIPTNLR	11288	10250	10150	12050	11322	8304.3	11169	12588	20540	24227	13219	10982	10709	9593.4	9035.4	9397.7	8085.6	6235.3	10195	10530	6594.1	7967.4	8114.1	7873	8685.3	9641.1	10492	11664	16633	16868	16216	14807	12960	12410	13063
5	Biotinidase	BTD	P43251	↓	[45]	0.02005624211133097	0.002728116133817098	0.08821866383360837	0.7142690930089988			2.94089	2817.38	SHLIIAQVAK	78.232	67.713	52.36	61.255	65.843	50.707	45.308	66.11	34.66	35.195	45.902	47.632	58.211	32.75	60.589	71.744	61.881	58.485	16.495	62.55	50.292	64.199	54.512	30.491	51.502	51.129	44.898	39.98	76.333	73.082	65.103	54.455	53.265	64.719	17.764
6	Pregnancy zone protein	PZP	P20742	↓	[26]	0.019159883064195853	0.016077593998144152	0.14922096977892	0.4031384240196575			4.25211	4057.57	ISEITNIVSK	15.997	17.445	64.582	58.783	54.804	57.116	53.084	61.785	53.997	53.043	90.125	80.744	22.11	21.767	51.341	51.97	106.73	116.71	54.77	37.65	4.2042	3.4697	1.3134	0.61826	84.641	82.244	43.145	41.985	111.39	116.13	3.4254	6.025	4.3275	3.1441	1.7036
7	Attractin	ATRN	O75882	↓	[25,26]	0.01911661814713115	0.019998686671401648	0.14922096977892	0.5479901750817294			4.26342	4066.82	SVNNVVVR	48.11	57.431	54.5	51.087	69.803	65.559	74.249	62.414	62.078	66.794	73.139	61.136	59.409	68.379	65.117	55.166	66.964	64.176	62.767	57.695	49.107	50.023	61.007	47.615	66.576	68.681	48.721	52.425	70.906	73.131	61.465	65.526	43.39	48.466	47.009
8	Fibrinogen gamma chain	FGG	P02679	↑	[25,26]	0.01910876882321446	0.026325790410832283	0.15656685959751662	-0.3308041331570022			257.682	254408	YEASILTHDSSIR	7554	7393.8	8115.3	7983.5	7681.4	7542.3	8964.8	8942.5	17273	16780	7998.9	7819.9	7796.3	7447.2	6959.9	6690.4	5376.6	5356	7685.6	7534.6	5979.3	5937.2	6330.6	6428.5	6217.2	6367.1	8689.3	8540.8	12825	12647	11419	11926	9677.2	9917.8	9666.6
9	Apolipoprotein A-IV	APOA4	P06727	↓	[26]	0.018676067030579467	0.013444185893163279	0.14922096977892	0.5476108109700012			48.1295	49317.8	LGEVNTYAGDLQK	979.05	969.74	722.15	732.23	919.32	925.36	765.96	809.09	917.18	920.65	849.18	902.97	728.34	701.74	754.09	751.24	1167	1166.8	549.82	578.89	1287.8	1244.4	1002.4	936.62	852.99	821.35	670.24	782.86	1749.3	1791.7	761.98	730.74	620.13	609.31	584.08
10	Vitronectin	VTNC	P04004	↓	[25]	0.018500951599904142	0.012849040776471954	0.14922096977892	0.3945270183421052			74.3217	74741.3	FEDGVLDPDYPR	1190.1	1197.5	1461.9	1535.6	1644.9	1605.4	1362.7	1315.8	1469.5	1410.8	1297.5	1251.6	1388	1386.1	1904.1	1874	1560.6	1568.2	1393.8	1391.8	1204.6	1237.7	1484.7	1475.5	1213.9	1257.9	1421.9	1489.6	2319.5	2464	1493.6	1495.4	1115	1189.9	1166.5
11	Cathelicidin antimicrobial peptide	CAMP	P49913	↓		0.018116950411075174	0.017556624894248092	0.14922096977892	0.472892891939038			15.8821	15523.1	AIDGINQR	2.364	4.6912	12.236	10.506	7.2106	4.6379	21.668	16.591	25.382	24.879	15.374	18.633	12.279	16.102	10.676	13.626	17.028	24.648	7.9392	13.278	2.8075	8.1459	12.004	12.448	17.56	19.622	10.398	13.462	19.73	21.581	9.4794	5.9395	2.6321	2.1135	2.45
12	Complement C1q subcomponent subunit B	C1QB	P02746	↑		0.01798114687548712	0.006726828383184208	0.13050047063377365	-0.63842977677197			11.7234	11691	IAFSATR	113.03	115.2	113.62	116.77	103.44	111.88	126.92	135.85	157.93	160.94	107.25	128.03	103.6	111.16	92.261	96.282	145.12	146.6	111.85	116.78	95.719	100.37	115.45	120.71	73.153	71.297	177.03	176.18	142.94	128.53	113.37	114.03	128.47	122.2	120.76
13	Alpha-1-acid glycoprotein 1	A1AG1	P02763		[25]	0.01778632882256482	0.05660701126975029	0.22373031675724842	-0.4469017076803663			167.89	165432	NWGLSVYADKPETTK	4492.9	4471.8	6130.4	6024.6	3581.7	3611.7	7021.8	6964.6	7605.3	7490.3	4549.2	4609	4873.1	4922.4	6714.9	6603.9	4013.7	3833.3	3203.6	3071.7	3640.4	3713.4	2891.5	2828.6	4167.6	4238.4	3814.6	3827	6278.1	6187.6	2671.9	2630.2	2085.5	2094	2065.3
14	Lipopolysaccharide-binding protein	LBP	P18428			0.01686192761024669	0.057662452772486696	0.22373031675724842	0.33197531610076964			42.3836	42825.7	ITLPDFTGDLR	56.217	53.948	24.415	24.202	28.674	27.707	57.324	60.574	89.794	87.08	40.214	38.02	35.187	36.131	39.611	39.889	28.479	27.08	46.121	45.87	38.618	34.851	46.96	44.211	21.891	21.784	31.828	30.818	65.325	68.559	22.017	21.27	16.977	14.815	15.263
15	Fibronectin	FINC	P02751	↑	[26]	0.016719351413485257	0.015725405058615943	0.14922096977892	-0.30830462609753356			35.5212	33769.7	HTSVQTTSSGSGPFTDVR	NaN	NaN	395.22	490.33	163.89	164.73	126.81	170.11	669.41	689.66	331.07	287.17	469.05	454.69	79.147	90.157	376.89	276.38	502.09	499.01	171.89	164.37	315.78	304.85	426.74	393.9	796.82	883.51	334.92	433.2	1094.4	957.04	1072.9	1104.4	1211.7
16	Complement C5	CO5	P01031		[25,26]	0.016485152871846962	0.06791713725670866	0.23528436835359787	-0.38214822099818335			12.7038	11765.8	VFQFLEK	159.96	148.26	147.51	144.29	163.94	150.19	153.21	133.3	154.64	157.81	126.27	119.64	128.57	124.93	133.79	121.08	126.76	126.74	160.18	140.21	108.17	101.24	126.06	122.69	121.42	121.12	125.46	112.68	157.52	151.79	136.45	131.99	133.52	137.2	128.65
17	Tenascin	TENA	P24821	↓	[25,26,37]	0.015195623076454735	0.02321797627828798	0.15656685959751662	0.4755833622021237			5.50455	5685.07	FTTDLDSPR	2.5121	2.7924	3.2573	3.4891	0.4153	1.9778	3.1455	3.846	2.9448	2.3983	2.7521	1.8838	3.2042	2.185	2.599	3.1199	0.5559	1.6732	1.0465	0.7185	1.3774	2.55	2.8027	1.7866	2.6551	1.8599	1.2442	2.2083	1.1601	1.8004	1.1222	1.1817	1.6984	0.67923	0.62464
18	Alpha-2-antiplasmin	A2AP	P08697	↓		0.015128891433341134	0.01020799088930763	0.14922096977892	0.5569670919417534			7.3261	7399.28	LGNQEPGGQTALK	518.9	465.54	472.77	591.39	614.95	652.31	529.57	593.88	621.77	505.16	480.53	495.62	644.58	503.7	594.12	660.5	630.41	716.83	609.69	636.89	459.21	386.79	501.62	567.75	646.2	682.99	523.1	597.9	808.57	795.12	555.3	546.28	435.37	416.51	479.35
19	Fibrinogen alpha chain	FGA	P02671		[25]	0.015043809230638031	0.10274442158815625	0.3214906094855212	-0.2502553364512101			45.6218	43958	ESSSHHPGIAEFPSR	4407.5	4173.9	3797.6	4142.3	3752	3898.5	4073.1	3789.3	9723.9	8962.5	3885.2	3827.9	4053.2	4080.8	3646.4	3470.6	2651.5	3122.4	3412.3	3276.4	2779.1	2938	3824.9	3677.9	3480.8	3657.7	4457.4	4446.7	8534.4	9204.2	6443	6995	5976.4	5773.1	6245.4
20	Apolipoprotein C-II	APOC2	P02655		[45]	0.01494212595152178	0.05156813938973055	0.21748302264364625	0.5296180302122067			10.1851	9832.09	TYLPAVDEK	495.85	501.42	671.58	654.64	1129.2	1114.3	841.28	851.86	732.18	755.82	1031.9	1027.7	1564.6	1538.7	1401.1	1379.5	1005.7	999.6	1524.7	1525.6	881.35	883.62	641.86	630.72	1220.4	1215.7	581.53	579.29	2673.9	2617.9	712.32	713.38	630.28	625.19	547.03
21	Fibulin-1	FBLN1	P23142			0.014435947989605943	0.43331289932011674	0.6091500178848017	0.2923233779670782			10.202	9909.82	TGYYFDGISR	116.09	106.28	173.95	191	178.62	170.94	156.56	150.58	186.36	185.54	153.06	150.22	121.97	115.06	144.25	154.89	97.955	112.54	165.75	162.71	151.06	159.58	133.56	135.77	112.19	109.56	150.8	141.48	204.01	190.07	167.22	154.46	148.29	152.41	164.26
22	Adipocyte plasma membrane-associated protein	APMAP	Q9HDC9			0.01432960581390325	0.12684011500065814	0.37283306530496485	-0.35065204200346434			4.52892	4466	LLEYDTVTR	NaN	NaN	14.764	14.427	11.015	12.521	12.985	12.983	10.35	11.923	22.987	21.688	11.193	10.517	14.495	10.615	11.766	11.659	5.8688	4.0546	14.923	13.909	3.9072	2.9933	5.7431	6.4127	12.559	11.874	7.0007	6.2179	4.4701	5.6058	2.948	3.0157	3.2199
23	Serotransferrin	TRFE	P02787		[25,26]	0.014131039493034136	0.28630880658512237	0.5340760430530167	0.24344000561120566			351.971	364873	DGAGDVAFVK	14686	14423	16294	15931	19047	19415	16870	16954	17421	17609	20353	20040	15357	15362	20139	20058	19537	19430	19057	18952	14814	14379	15532	15540	16833	16740	13928	14248	19836	19678	15114	14749	16439	15742	14520
24	Metalloproteinase inhibitor 2	TIMP2	P16035			0.013831747401798464	0.17476512296089108	0.4346722289027291	0.38555234299418695			3.7666	3708.91	EYLIAGK	8.1312	5.2843	7.4747	7.9506	4.4749	5.5727	3.7076	2.6356	6.2404	5.6312	7.2093	6.3139	6.3022	5.6742	2.739	7.3977	6.6322	4.5918	5.6894	4.9499	2.2505	7.4753	1.7206	4.4301	6.1498	5.5369	3.9903	3.2513	7.4577	8.522	8.6491	9.6283	6.093	8.6549	8.2854
25	Alpha-1-antichymotrypsin	AACT	P01011		[25]	0.012828303928871417	0.08830806921399016	0.2855294237919015	-0.4748132115532311			37.4123	37412.6	EIGELYLPK	1810.3	1829.8	3008	2777.9	2014.5	1992.7	2755.8	2719.7	3293.4	3414.6	2116.6	2113.4	1875.1	1925.9	2199.6	2228.5	2042.2	1981.8	1740.7	1714.2	1863	1859.9	1491	1487.2	1769.6	1772.1	1821.9	1747.3	1789.5	1825.1	1951.2	1896.3	1775.8	1765.3	1590.6
26	Peroxiredoxin-2	PRDX2	P32119		[25]	0.012585742490513982	0.19901899767332376	0.4708498237637172	-0.00900968170472193			17.255	16817.6	GLFIIDGK	6.5514	4.6197	10.988	10.866	11.893	11.456	10.274	10.948	38.567	40.549	11.678	11.818	17.924	16.465	11.71	10.956	12.741	11.6	13.214	11.153	17.505	17.179	21.71	20.56	21.403	21.577	12.287	13.787	14.761	13.514	10.436	9.4062	11.645	11.584	10.868
27	Apolipoprotein C-IV	APOC4	P55056	↓		0.012525063871455218	0.027439552712966827	0.15656685959751662	0.3957467997486578			9.49392	9231.72	ELLETVVNR	34.398	19.966	33.234	31.751	47.748	47.236	55.337	65.643	42.818	27.067	44.84	44.545	61.983	43.598	71.125	64.135	24.89	32.309	71.86	61.598	37.519	18.799	37.792	32.012	85.321	82.881	32.755	10.883	147.47	129.39	3.7066	15.453	0	10.069	16
28	Vascular cell adhesion protein 1	VCAM1	P19320	↑	↑[25,26,37]	0.01247076240436383	0.04428924988462575	0.2045741542289856	-0.32321288804335496			4.34372	4371.4	NTVISVNPSTK	18.173	14.734	6.9947	11.009	12.557	10.633	16.215	13.615	14.554	14.218	9.6828	10.781	10.198	11.175	15.308	14.084	10.818	9.37	3.5046	7.9668	11.95	10.412	10.2	11.694	10.213	14.35	11.56	11.003	14.078	12.51	12.067	8.5393	9.7064	8.277	11.232
29	Plasminogen activator inhibitor 1	PAI1	P05121	↓	[37]	0.012349869755907293	0.03431481558402585	0.17872097528693354	0.392381701872222			16.1996	14788.1	VFQQVAQASK	253.08	220.06	20.258	49.873	10.203	5.8673	3.804	0	48.233	12.161	28.295	43.311	43.826	30.627	19.495	9.0898	46.692	32.728	64.626	2.5413	34.047	1.6196	15.493	6.8293	28.065	28.427	38.18	47.539	11.494	57.266	19.643	70.726	39.313	10.638	49.879
30	Beta-2-glycoprotein 1	APOH	P02749		[26]	0.012236803159209038	1.0	1.0	0.007386412596720156			37.8067	38277	ATVVYQGER	1840	1886.1	1809.6	1799	2362.7	2269.3	1967.6	1845.9	2031.3	1967.1	2053.4	1883.3	2294.3	2324.4	2643.5	2567.8	2600.3	2415.5	2087.2	2026.3	2258.6	2265.7	1858.7	1890.9	1833.1	1689.8	2229.1	2246.6	1495.3	1432.4	2005.2	1928.8	1646.1	1619.8	1757.2
31	Cystatin-C	CYTC	P01034		[25]	0.011269354853705475	0.21650116563464206	0.4883863503851228	-0.4200473197491828			14.3686	13903.5	ALDFAVGEYNK	43.039	52.035	33.729	29.742	32.868	34.79	23.905	21.656	32.14	35.033	40.026	41.053	36.082	36.138	40.258	54.651	40.535	37.485	31.618	28.424	35.411	48.183	25.254	28.521	22.773	23.917	33.644	41.707	47.897	52.099	32.295	22.075	27.413	22.447	25.255
32	Ceruloplasmin	CERU	P00450	↓	[25,26]	0.011157779000395785	0.03500720134486327	0.17872097528693354	0.4552081281876523			48.6424	50674.2	IYHSHIDAPK	1142.7	922.58	1382.1	1468.3	1126.2	927.18	1687.8	1686.4	1685.2	1596.6	1173.3	1298.9	794.67	1092	1486.6	1398.6	1264.1	1215.2	916.34	1074.7	1088.6	1131.6	893.25	880.42	1083.4	1051.3	1096.5	1184.2	1363.3	1172.8	976.87	1236.5	1286.5	1175.9	1166.5
33	Alpha-1B-glycoprotein	C1QC	P04217		[25,26]	0.010920572358966298	0.2754986259004446	0.5340760430530167	-0.38956089650346165			84.7246	85018.5	LETPDFQLFK	1393.9	1370.9	872.98	875.01	1746.9	1682.2	1761.6	1707.3	1793.1	1795.9	1523.6	1511.4	721.03	730.12	1550.4	1523.2	1693.1	1713.6	1704	1674	1386.8	1352	1157.5	1176.8	1306.7	1373.9	1352.6	1373.2	1560.9	1575	1380.5	1354.7	1255.1	1216.1	1169.8
34	Cation-independent mannose-6-phosphate receptor	MPRI	P11717			0.010857987975804846	0.152788849159421	0.42344338195610964	0.1671043558848065			1.82584	1798.5	GHQAFDVGQPR	3.4035	6.6709	1.0674	7.1776	2.3857	NaN	3.3071	0.18881	NaN	3.518	2.8448	NaN	6.3651	0.4396	1.8777	1.7142	1.94	4.556	2.1645	1.8735	2.4567	3.3709	0.74811	4.3002	1.7274	NaN	NaN	3.4926	2.5437	NaN	5.5124	NaN	0.47701	0.36441	0.79397
35	Cholinesterase	CHLE	P06276	↓		0.010412896650321121	0.04872908154459235	0.21485095044661173	0.44484716416402015			5.30371	5243.93	YLTLNTESTR	5.0209	5.0773	5.6186	6.272	6.5308	6.8777	5.3406	5.8727	5.0508	5.114	4.5351	5.281	7.5744	7.4037	4.7195	4.5697	7.6389	7.8575	4.299	5.3797	3.3882	2.4601	4.626	4.3909	8.2053	8.4247	6.4851	5.9485	11.832	11.381	4.8213	5.2829	3.6868	3.3359	3.4359
36	Complement C1r subcomponent-like protein	C1RL	Q9NZP8			0.010094427332744491	0.11522227386064147	0.34926751764006947	0.2755351305899957			3.9741	3807.8	VVVHPDYR	31.884	41.119	43.413	45.08	44.92	42.129	53.62	35.884	45.853	44.706	33.734	31.804	30.855	38.753	48.125	38.05	41.232	37.027	48.065	42.661	20.614	26.763	54.316	31.504	40.604	44.317	38.449	45.034	86.857	69.448	41.264	39.3	38.032	31.228	39.937
37	Thrombospondin-1	TSP1	P07996	↓	[40]	0.009811353130000547	0.024422760710003367	0.15656685959751662	0.49695937780915017			4.13935	4127.68	GTLLALER	2.4971	2.8713	NaN	4.289	7.6767	5.4554	6.2728	5.9829	2.0718	1.3586	NaN	3.4326	1.6569	NaN	2.3561	2.4562	4.3542	3.7634	NaN	NaN	7.5116	7.6425	2.1875	2.1821	8.2397	5.8001	13.815	11.869	0.65242	1.9529	NaN	NaN	NaN	NaN	NaN
38	Carbonic anhydrase 1	CAH1	P00915			0.009682727876768075	0.32043959674949185	0.5359076014603571	0.016982595345096985			6.01356	5988.98	VLDALQAIK	27.89	26.089	36.277	36.411	53.134	51.976	46.583	46.784	134.6	128.3	40.078	41.197	48.285	54.119	46.143	47.628	53.417	51.651	45.137	46.273	54.325	53.9	51.06	50.725	51.325	51.995	40.52	38.344	47.517	53.77	35.643	33.624	37.074	38.212	36.123
39	Apolipoprotein B-100	APOB	P04114		[25,26]	0.009423920482214437	0.24149270164687375	0.5147520634694134	-0.3007783077086389			17.6921	17777.8	FPEVDVLTK	196.9	190.88	96.217	99.33	91.291	94.026	126.07	120.3	113.47	113.52	119.11	122.94	140.06	146.14	180.69	185.07	174.68	171.74	94.637	95.637	78.947	78.644	94.101	98.817	77.51	72.569	244.62	244.18	263.16	266.3	141.69	139.32	119.47	123.6	142.76
40	Phosphatidylinositol-glycan-specific phospholipase D	PHLD	P80108		[45]	0.009360209555418076	0.5129235255213201	0.663381093007574	-0.1144278747285737			4.94067	4912.25	FGSSLITVR	32.016	36.21	32.377	29.734	61.383	56.946	44.738	39.983	41.468	30.744	39.289	36.974	58.327	58.271	52.917	44.983	52.488	50.928	51.351	45.26	46.102	40.147	28.835	22.23	30.35	25.926	41.084	41.184	58.3	69.559	46.293	48.023	46.532	45.469	42.808
41	Coagulation factor X	FA10	P00742		[35]	0.009287685194966852	0.06670835796701907	0.23528436835359787	0.3145070325070231			6.49472	6195.14	TGIVSGFGR	88.938	93.363	87.168	90.568	89.964	90.96	78.376	71.658	82.918	79.497	85.556	81.603	81.724	90.036	103.45	104.19	98.361	98.249	76.167	69.82	69.468	60.92	64.638	60.941	79.828	78.003	72.445	75.441	131.6	115.61	68.251	66.155	56.202	53.396	53.855
42	Hyaluronan-binding protein 2	HABP2	Q14520			0.009201072745916245	0.06204911402687687	0.23149092540796373	0.4132126862614721			5.71083	5782.08	VVLGDQDLK	89.009	87.345	140.92	144.5	118.64	122.51	116.42	118.92	116.49	114.53	133.96	132.67	112.4	112.48	155.1	156.3	120.88	126.96	104.01	104.16	96.61	98.324	107.02	103.16	103.72	100.5	88.937	91.692	150.53	151.01	112.2	105.6	74.145	70.875	75.308
43	Lysozyme C	LYSC	P61626		[25,45]	0.009098025879644584	0.3011626526031871	0.5359076014603571	-0.4263536202306388			5.2744	5003.78	AWVAWR	51.971	52.564	37.556	40.306	46.536	47.576	46.904	49.657	65.967	61.652	64.129	66.975	67.794	60.376	70.013	61.028	67.878	60.991	41.883	42.616	34.823	33.809	44.324	44.29	57.281	56.021	52.658	47.252	60.569	58.124	36.732	39.017	37.578	33.353	36.661
44	Leucine-rich alpha-2-glycoprotein	A2GL	P02750			0.008478112820608	0.39186817837552657	0.6033525921020012	-0.324455017693493			5.50055	5506.05	DLLLPQPDLR	414.68	406.67	456.36	453.67	399.46	436.95	648.63	634.89	889.2	890.79	438.38	447.27	379.67	398.13	356.5	364.93	347.69	363.88	473.16	473.52	338.29	341.01	304.13	291.95	215.94	224.28	282.17	281.08	417.54	418.24	346.26	341.5	300.78	304.2	256.22
45	Plasma serine protease inhibitor	IPSP	P05154			0.008435504171701701	0.43331289932011674	0.6091500178848017	0.10207326783368616			2.87132	2740.09	AVVEVDESGTR	95.592	163.45	0	23.143	60.441	26.431	9.3868	5.585	42.305	32.093	103.42	11.67	92.657	23.589	36.12	60.118	193.16	51.029	19.187	86.15	53.831	49.488	86.003	65.579	10.952	3.0771	85.891	93.751	108.68	114.33	66.433	88.734	41.943	49.339	37.158
46	Alpha-2-macroglobulin	A2MG	P01023		[25,26]	0.00834546485534836	0.41922401518188324	0.6091500178848017	0.24385027943937204			41.4156	41411.5	AIGYLNTGYQR	4873.7	4906.3	1320.3	1280	5627.5	5513.6	4766.1	4678.9	5241.6	5170.1	5922.6	6009.8	4521.8	4489.9	4080.9	4191.4	4682.6	4713.2	5161.3	5117	4429.9	4701.8	5032.3	5069.1	5210	5347.7	4620	4668.9	4778.5	4621.1	9196.9	9023.3	8396.9	8636.4	8193.1
47	Apolipoprotein A-II	APOA2	P02652		[14]	0.008197141082638705	0.03715634314247907	0.1802082642410235	0.4284634427584972			134.092	131149	EQLTPLIK	10505	10534	7458.3	7263.7	10449	10782	9225.8	9171.2	7865.4	8140.3	8483.1	8329.8	10658	10355	8075.5	7993.6	10911	10785	9031.1	8898.5	6907.4	6914.9	7339.3	7434.5	9584.3	9414.4	8115.1	8100.6	10097	9813.5	8986.8	9045.5	7239.2	7147.2	6842.8
48	Gelsolin	GELS	P06396		[25,26]	0.008158046320978284	0.29367273461256393	0.5359076014603571	0.23352692342736145			52.4976	51824.7	AGALNSNDAFVLK	611.15	640.96	777.56	762.34	682.2	717.23	613.52	631.05	672.02	679.64	735.89	729.05	819.7	804.15	702.12	660.74	810.44	794.76	686.52	681.56	795.63	813.47	638.7	635.19	734.48	738.19	608.12	582.72	741.89	667.31	703.82	702.04	649.29	673	617.09
49	Pigment epithelium-derived factor	PEDF	P36955		[25,26]	0.008103350413965744	0.48220634902516357	0.6496391091033453	0.008633723510429021			42.2134	42629	LQSLFDSPDFSK	221	217.76	140.79	135.35	153.02	147.82	143.03	143.14	149.92	153.68	157.92	153.41	162.67	168.71	242.57	242.83	196.08	206.13	118.9	114.44	163.93	172.45	161.89	162.7	115.79	118.49	196.96	195.69	323.29	333.99	140.97	150.97	110.79	113.57	115.76
50	Plasminogen	PLMN	P00747		[25,26]	0.00790895985403176	0.0703887522256505	0.23543824020303789	0.3237385936920632			9.04438	9713.75	LFLEPTR	284.39	283.88	388.14	368.3	405.72	388.14	315.21	325.77	302.32	306.28	289.77	294.64	328.2	343.19	412.68	403.07	352.5	329.15	381.68	359.52	291.24	290.46	325.65	312.91	293.32	307.64	280.17	276.63	481.91	488.96	366.02	346.55	310.36	301.32	287.21
51	Alpha-1-antitrypsin	A1AT	P01009		[25,26]	0.007655670628380955	0.24804596747331586	0.5147520634694134	-0.20026158289512044			49.9928	48261.3	LSITGTYDLK	12909	12131	14658	14287	12023	11814	15548	15904	18819	18827	14178	14531	11619	11677	11716	12153	12428	12690	12612	12446	12434	12244	11295	11050	10841	10859	12001	12190	11583	11664	13384	13881	13808	14192	12485
52	Transthyretin	TTHY	P02766		[25,26]	0.00760651206663612	0.2547226705828025	0.5147520634694134	-0.17817703918685757			24.6984	24562.4	GSPAINVAVHVFR	442.63	462.71	384.86	416.82	315.75	295.39	571.41	560	247.5	247.96	718.75	765.32	618.4	579.64	1185.6	1129.1	433.62	439.21	453.49	454.4	514.09	487.16	544.71	552.44	373.73	359.58	839.83	854.72	1130	1079.2	385.24	399.74	182.91	193.12	396.82
53	Protein S100-A9	S10A9	P06702		[26]	0.0075923604428607796	0.4099829708338143	0.6091500178848017	-0.1729644084439744			10.6	10600	DLQNFLK	2.1587	2.4604	14.925	17.531	4.1666	5.1516	31.945	29.289	55.313	56.788	8.1228	8.7084	3.6956	4.0349	10.135	9.2008	7.8699	6.1225	3.1058	5.5193	5.8427	3.8326	3.9605	6.1278	7.0587	10.162	10.051	7.4189	12.816	12.118	2.3312	1.9774	4.865	3.3742	1.7839
54	Interleukin-10	IL10	P22301		[25]	0.007442277317971321	0.2547226705828025	0.5147520634694134	0.24779437001947102			4.68744	4625.18	AHVNSLGENLK	8.4017	7.256	25.368	27.373	13.562	14.873	34.542	40.622	27.36	2.1067	15.46	13.155	18.772	24.438	9.9484	10.222	34.97	29.879	22.443	26.27	50.627	41.628	23.915	19.921	33.114	28.538	5.3364	12.495	21.583	26.078	19.287	6.5345	8.4745	8.018	9.5488
55	Apolipoprotein A-I	APOA1	P02647		[25,26]	0.007382983126841111	0.19342730790832685	0.46906122167769265	0.37562560743964374			130.379	132353	ATEHLSTLSEK	19975	18950	33682	30581	34324	32690	26839	27099	26897	26338	33040	33872	22870	22484	30660	31516	31242	30577	22673	21282	33010	30528	20286	19085	28578	29822	19505	19534	30990	33032	24752	24712	21406	21139	19406
56	Thyroxine-binding globulin	THBG	P05543		[26]	0.007370179686679679	0.32043959674949185	0.5359076014603571	0.1944965058505665			6.64778	5497.69	AVLHIGEK	170.61	169.15	173.5	152.42	207.33	187.12	174.46	160.49	178.9	189.82	188.58	187.93	173.26	178.96	159.72	146.02	194.54	206.18	165	160.59	137.87	134.27	153.62	178.83	173.55	174.25	187.08	183.4	157.93	164.52	159.48	152.04	136.51	158.92	135.54
57	Alpha-2-HS-glycoprotein	FETUA	P02765		[26]	0.007040100766483209	0.3529235667159957	0.5612063274008456	0.21507035385684092			27.5509	28160.3	FSVVYAK	2513.5	2515.3	1773.1	1764.7	2129.6	2117.6	2454.2	2408.1	2670.1	2586.4	2430.6	2442.5	2586.3	2560	2867	2848.9	2480.2	2426.6	2089.8	2074	2071	2154.4	1902.6	1898.7	1963.6	2018.6	1598.8	1600.6	2438.8	2565.8	2524.2	2449.5	2417.1	2416.2	2359.4
58	Vitamin K-dependent protein S	PROS	P07225		[25,26]	0.007039043228270666	0.4525175835716596	0.6270600800921569	-0.1519489085747693			27.0471	27485	SFQTGLFTAAR	114.55	112.6	102.06	97.042	113.98	108.9	127.61	131.97	147.28	145.94	99.281	100.01	94.903	94.757	142.31	138.45	104.97	118.93	102.75	100.69	87.809	75.5	83.494	101.49	67.647	66.284	95.406	98.227	148.71	156.05	100.46	108.93	93.215	96.064	83.031
59	Kallistatin	KAIN	P29622		[45]	0.006993987471293558	0.7527391712504827	0.8204011192280543	0.03178840104410535			76.8398	78881.5	VGSALFLSHNLK	50.593	37.662	44.052	44.688	61.505	58.573	36.936	38.046	24.628	25.491	29.701	31.432	44.746	42.443	41.856	45.43	74.878	71.309	40.288	39.287	34.405	35.884	47.771	44.149	32.135	37.439	40.873	38.099	54.092	55.167	47.591	53.295	31.731	29.644	32.394
60	Complement component C9	CO9	P02748		[45]	0.006967222419658771	0.3126341100236857	0.5359076014603571	-0.31525389509736657			33.7142	33065.4	LSPIYNLVPVK	810.95	758.57	919.39	886.07	649.37	631.07	904.9	937.49	1173.3	1168.2	621.88	615.78	552.74	530.35	581.83	555.96	462.15	454.14	682.85	655.55	511.38	506.15	616.04	599.25	424.99	405.16	530.18	529.56	561.08	549.49	670.52	638.69	608.9	595.47	557.89
61	Prothrombin	THRB	P00734		[43]	0.006924778918955236	0.8210652319374645	0.8472694414673836	0.005748865088122735			33.663	33729.6	ELLESYIDGR	439.65	454.82	495.77	498.26	497.51	502.45	589.98	569.23	565.7	579.55	466.88	480.54	508.14	505.15	570.92	532.64	531.32	524.45	469.82	476.84	322.56	340.17	387.19	386.62	463.91	480.31	429.31	406.42	626.98	637.41	405.58	425	386.57	390.44	351.15
62	Zinc-alpha-2-glycoprotein	ZA2G	P25311			0.006893900427365621	0.36991829011284105	0.578743131305574	-0.19945271591006983			30.7849	30809.2	EIPAWVPFDPAAQITK	350.99	349.31	216.31	221.14	343.35	341.74	330.23	326.83	337.92	339.16	292.96	288.36	349.41	349.37	389.09	387.75	243.77	242.33	231.25	231.56	317.64	321.2	235.19	242.23	240.78	247.82	380.67	381.15	220.84	219.02	136.76	137.14	320.86	315.85	314.21
63	Complement factor H	CFAH	P08603		[25]	0.006576154215995191	0.7835919104014201	0.8261784272710625	-0.06192075932252107			19.0372	18811.4	SSQESYAHGTK	1139.7	943.81	1074	1226.4	1246.7	1236.3	1390.5	858.96	1033.3	1129	1163.3	532.12	1155.2	1056.2	1401.6	1374.2	851.02	1037.8	973.55	767.53	718.33	915.56	922.49	957.92	924.69	846.17	1435.7	1151.7	1158	1298.1	995.1	1207.7	1714.2	1041.4	769.11
64	Complement factor B	CFAB	P00751		[26]	0.006543742734003742	0.13935000806039646	0.39755737593701346	0.3313226317157511			13.7114	13968.4	EELLPAQDIK	1055.5	1056.3	1365.1	1383.6	1223.4	1230.2	1360.2	1399.2	1375.3	1367.3	1063.1	1061.7	1060.3	1007.6	1257.9	1240.9	1192.2	1189.9	1060	1025.9	865.87	804.69	878.13	858.05	871.8	868.52	885.89	938.21	1385.8	1385.8	876.09	889.64	688.32	683.91	622.29
65	Adiponectin	ADIPO	Q15848			0.006508089249616886	0.5500077633032852	0.6800194368396618	0.07038897561843994			6.61338	3557.48	IFYNQQNHYDGSTGK	71.345	76.03	151.16	130.1	107.35	103.98	101.41	95.367	83.257	84.355	179.04	163.22	77.454	72.823	232.84	216.89	98.836	92.689	124.41	104.53	153.11	136.34	18.946	15.29	99.06	110.67	77.197	76.868	68.032	63.554	179.21	161.67	108.02	116.84	116.41
66	Phospholipid transfer protein	PLTP	P55058			0.006485817374873092	0.5500077633032852	0.6800194368396618	0.09008032030795818			5.55587	5702.48	AVEPQLQEEER	23.461	20.968	30.479	14.301	26.52	36.643	41.591	37.233	41.17	31.756	41.939	39.043	32.05	26.082	40.774	27.302	30.318	16.493	22.469	24.06	30.839	34.95	25.84	19.734	27.844	35.767	34.755	29.086	51.606	60.485	37.753	27.589	28.822	26.242	21.928
67	Coagulation factor XII	FA12	P00748		[45]	0.00646183130497892	0.6744566116788021	0.7607243178237652	0.18567505728230158			8.13696	7892.04	EQPPSLTR	217.76	191.97	374.89	379.19	338.97	348.62	353.63	352.55	370.44	369.65	191.82	221.01	353.29	353.45	463.76	522.79	398.19	355.87	264.65	230.37	137.2	138.38	321.54	296.65	256.15	282.3	298.06	336.36	453.93	460.02	183.62	178.03	174.22	150.03	152.95
68	Complement C3	CFAB	P01024		[25]	0.006433546967449983	0.539278860900589	0.6800194368396618	0.09996558193408168			161.968	159669	TGLQEVEVK	2779.8	2806.7	3280.6	3248.9	3107.8	3075.3	2791.3	2824.8	2639.3	2713.4	2294.8	2265	2805.3	2715.4	3512	3477.2	3135.5	3256.6	3014.4	2931.3	1918.1	1916.9	3015.9	3003.1	2399.8	2301.5	2878.7	2852.3	3852.8	3842.8	3277.4	3240.9	2558.5	2566.4	2529.2
69	Ig mu chain C region	IGHM	P01871		[25,26]	0.006425827064034582	0.17476512296089108	0.4346722289027291	0.23308084995257783			40.2138	38800.1	GFPSVLR	76339	72285	3440.6	3619.9	3710.8	3783.4	4647	4556.9	5560.5	5419.3	3081.1	3133.1	3124	3056.4	2851.2	2775.8	1102.3	1133.7	3671.7	3572.3	4033.8	4040.1	6627.5	6473.3	4544.9	4269.8	1994.1	1918.2	2481.6	2531.4	3492.5	3599.5	3471.7	3716.3	2835.2
70	Hemoglobin subunit alpha	HBA	P69905		[25,26]	0.00640964497554821	0.47219407745158193	0.6451102184901895	0.01514538696841617			11.6637	11163.9	VGAHAGEYGAEALER	219.53	220.7	385.98	394.26	437.28	450.01	423.52	396.3	1328.7	1317	502.89	473.51	496.84	471.56	533.18	548.24	430.33	424.45	343.62	361.31	469.29	498.12	567.4	494.24	506.4	554.52	308.19	355.22	439.71	461.07	299.19	304.96	462.07	457.96	688.64
71	Mannan-binding lectin serine protease 1	MASP1	P48740			0.0063697457642369615	0.2076266374561715	0.47951866269639604	0.2680755770271723			69.7619	70236.3	TGVITSPDFPNPYPK	60.591	49.825	48.302	53.353	50.326	60.484	49.348	52.367	51.225	38.905	33.807	44.873	70.037	67.101	87.088	87.917	73.101	64.318	53.708	60.525	40.512	35.328	53.369	46.916	68.816	64.388	52.759	50.607	116.84	111.79	65.899	59.241	55.169	44.008	56.908
72	Plasma protease C1 inhibitor	IC1	P05155		[25,26]	0.006312774205317787	0.3405057088894432	0.5504842293712665	-0.22921209077985372			25.9217	26235.7	FQPTLLTLPR	1214	1167.9	355.58	347.43	891.37	904.69	695	695.87	1264.8	1263.8	1031.1	1061.3	345.35	350.84	1374	1346.5	1092.5	1099.2	926.36	922.66	1021.1	1018.3	902.29	891.9	837.2	835.81	860.01	856.53	1120.6	1088.6	918.46	906.61	809.45	786.01	771.81
73	L-selectin	LYAM1	P14151			0.006301733799814471	0.49233293832661884	0.6541958221600278	0.17048342756706916			9.4488	9572.49	AEIEYLEK	29.958	27.717	26.474	30.207	21.421	20.946	33.108	37.721	34.672	35.349	31.376	34.256	25.689	26.547	29.372	29.119	25.262	26.593	22.827	26.354	25.445	24.719	32.179	29.744	36.344	38.372	21.304	19.813	24.984	31.202	26.488	23.567	22.458	23.727	24.827
74	Apolipoprotein C-III	APOC3	P02656		[45]	0.006242638832160507	0.16228158486176392	0.42544091166462433	0.3275109054772341			70.7412	70040.1	GWVTDGFSSLK	2291.8	2243.2	2721.8	2751.2	3429.2	3272.2	3779.8	3739.2	3086.2	3061.2	4115.5	4000.2	4670.2	4683.2	7634.9	7503	4680.8	4806.7	4598.2	4548.6	2713.1	2665.3	2639.8	2709.6	4271.1	4203.3	3047	3062.1	8379.3	8529.6	2462	2499.5	1751.7	1773.9	1916.4
75	Heparin cofactor 2	HEP2	P05546			0.0061744845189441195	0.24804596747331586	0.5147520634694134	0.19565814762484107			14.245	14035	TLEAQLTPR	347.05	348.82	775.48	765.71	633.35	600.32	597.38	580.68	597.34	592.35	527.82	535.5	437.39	466.04	773.2	788.76	550.49	509.07	593.83	615.51	391.18	418.98	648.92	645.64	370.72	380.12	453.26	451.73	984.82	974.13	452.78	457.78	378.31	364.64	378.61
76	Clusterin	CLUS	P10909		[25,26]	0.006026927607743564	0.4285864408595531	0.6091500178848017	0.1796373472144241			3.98192	4132.8	ELDESLQVAER	619.56	638.36	767.88	756.13	853.45	858.58	811.85	777.31	871.43	833.88	734.49	677.75	845.06	823.5	844.93	875.01	818.12	755.8	900.33	820.52	665.93	645.01	736.54	710.66	741.46	648.7	708.45	730.54	899.69	860.05	861.68	851.51	710.87	648.43	705.62
77	Fetuin-B	FETUB	Q9UGM5		[26]	0.006019170061952018	0.6626953669021717	0.7607243178237652	0.21902628343753236			82.5061	81522.4	LVVLPFPK	29.886	10.528	12.915	13.954	17.902	17.601	24.023	23.757	22.677	24.457	19.289	19.754	15.317	16.856	15.979	15.671	12.397	12.449	15.819	13.942	6.0269	6.011	11.995	11.996	3.2962	2.7177	13.367	14.134	36.614	37.002	14.261	13.468	7.4123	8.2254	9.9243
78	Haptoglobin	HPT	P00738		[25,26]	0.00601170230979064	0.6221972838622097	0.7360138601784676	-0.2591459624080502			510.26	522609	DIAPTLTLYVGK	3306.1	3359.2	16490	16411	5559.6	5459.7	8815.4	8749.6	10272	9993.6	7214.7	7235.8	3132.5	3322.6	9175.9	9429	2581	2555.2	8872.4	8817.8	4432.4	4458.3	9876.8	10006	1167.1	1193.6	3881	3855	12722	12255	3942.9	3886.8	2983.8	2981.2	2973.6
79	CD5 antigen-like precursor	CD5L	O43866		[25,26]	0.005992787566090408	0.28630880658512237	0.5340760430530167	0.17357635040596744			90.3029	87194	LVGGLHR	955.52	801.77	311.35	250.08	292.86	304.89	355.94	362.69	439.48	428.78	221.96	234.64	247.64	255.59	209.74	227.87	97.997	94.429	272.12	267.08	321.96	297.68	525.43	551.75	365.74	382.87	167.17	147.33	253.17	254.13	301.15	298.3	320.12	315.44	245.55
80	Kininogen-1	KNG1	P01042		[26]	0.005972271766973497	0.3405037215408494	0.5504842293712665	0.2180486810372289			70.0328	70724.8	TVGSDTFYSFK	1105.2	1118.1	1413.3	1379.5	1649.8	1551	1554.4	1590	1510.9	1576.6	1275.6	1338.7	1379.1	1394.6	1547.6	1534.8	1594.8	1594.4	1090.3	1123.5	1012.7	994	1032.6	987.99	1221.5	1248.9	1231.6	1251.2	1974.2	2035	1209	1229.1	1016.3	1074.3	957.87
81	Apolipoprotein D	APOD	P05090			0.005906403486100846	0.7527391712504827	0.8204011192280543	-0.030369495048291315			6.02803	6019.77	VLNQELR	613.36	586.19	826.52	825.05	744.43	745.03	751.31	700.84	752.04	722.09	1018.6	910.77	813.09	861.48	851.31	879.67	911.81	923.52	646.33	601.33	1085.3	1063.5	635.91	669.94	386.63	392.78	718.19	764.03	830.14	805.37	771.08	738.31	689.48	701.49	670.26
82	Apolipoprotein C-I	APOC1	P02654			0.0058399324265735915	0.5608407726512674	0.6800194368396618	0.15104318481706777			32.8388	32884.1	EWFSETFQK	2854.8	2891.1	2438.1	2461.6	2990	2942.9	3823.6	3856.1	2715.1	2709.5	5160.9	5218.2	4424.7	4462.7	5231.8	5309	3921	3877	3494.2	3409.9	3030.6	2869.3	2361.3	2393.3	3717.9	3638.8	3045.9	3129.4	6955.4	7151	3416.8	3258.6	2216.1	2175.4	2985.6
83	Hemopexin	HEMO	P02790		[25]	0.005751495350659377	0.771206913271445	0.8220557207398919	-0.10853416607837353			73.2293	72364.8	NFPSPVDAAFR	5100.9	5009.2	5886.2	5962.3	5416.5	5244	6771.1	6799.6	7080.4	7033.8	6203	6147.9	5095.6	4939	7046.9	6837.7	6580.8	6419.3	5247.3	5149.9	5392.3	5187.7	4603.4	4418.1	4498.9	4417.8	5470.3	5479.7	7550.6	7494.7	4909.4	4805.3	4565.5	4387.9	4324
84	Glutathione peroxidase 3	GPX3	P22352			0.005668409716297853	0.9420455320980741	0.9618780696159283	0.05256133051632168			6.53263	6430.66	QEPGENSEILPTLK	59.592	69.107	78.02	89.493	75.945	73.673	84.959	73.012	90.104	97.089	66.832	60.981	69.594	74.594	48.563	46.9	52.211	48.3	67.479	69.594	68.407	55.925	59.308	63.033	67.46	63.55	65.393	63.216	57.655	49.453	92.684	91.327	83.897	89.333	76.565
85	Complement C1q subcomponent subunit C	A1BG	P02747			0.00561507652257472	0.2754986259004446	0.5340760430530167	-0.21339811851270388			41.2819	43780.1	FNAVLTNPQGDYDTSTGK	445.74	443.04	676.86	585.31	597.45	580.07	633.84	590.88	650.46	704.61	533.06	568.14	524.57	582.17	516.23	463.49	682.98	764.12	635.92	574.3	510.84	517.17	522.63	595.29	617.12	617.18	539.07	509.68	688.91	739.28	564.09	623.32	501.77	536.05	479.46
86	Serum albumin	ALBU	P02768		[25]	0.005557266879855219	0.5077341561916938	0.663381093007574	0.19828107723968028			1393.17	1.39623e+06	LVNEVTEFAK	271380	266180	269030	275460	306950	304200	260120	255870	266120	268870	317340	310330	306580	307600	290530	287280	330800	325030	266700	264690	269290	269340	281240	275080	309290	308060	268090	266500	297160	290060	345440	344460	329960	339320	319040
87	Inter-alpha-trypsin inhibitor heavy chain H2	ITIH2	P19823		[25,26]	0.005512586726398925	0.7527391712504827	0.8204011192280543	0.1046362067521197			35.2328	37665.5	SLAPTAAAK	805.35	933.21	874.73	910.05	1221.5	1161.8	818.94	877.16	779.93	795.05	789.35	812.9	965.09	936.15	1023.7	1004.2	1167.7	1140.5	1072.2	1090.4	720.26	681.48	1013.2	970.87	968.32	920.63	993.72	986.98	1061.8	1091.2	923.39	955.63	801.94	818.85	863.07
88	Retinol-binding protein 4	RET4	P02753		[26]	0.005385575194408818	0.5554113681960667	0.6800194368396618	-0.07607956532394361			70.0353	71251.8	YWGVASFLQK	831.74	805.1	472.91	454.73	642.12	652.59	507.55	508.45	452.98	458.65	581.47	586.6	874.29	889.26	1343.7	1349.5	1012	1013.6	731.96	717.49	623.08	608.08	628.61	615.18	511.17	514.05	667.34	656.12	1132.7	1149.4	442.91	433.46	429.83	419.3	495.94
89	Carboxypeptidase B2	CBPB2	Q96IY4			0.0052922795242163435	0.9871104446414449	0.99739284510646	0.0402241584790328			39.1052	37808.7	IAWHVIR	47.077	15.312	57.793	54.528	59.207	43.623	49.39	52.282	57.87	55.142	34.383	50.94	61.808	42.196	65.277	54.098	60.623	71.313	36.759	57.477	29.857	47.489	38.399	39.805	28.83	41.631	48.014	66.758	66.835	61.112	49.591	46.368	31.036	25.968	23.082
90	Apolipoprotein L1	APOL1	O14791			0.00528585796354588	0.3049549126766835	0.5359076014603571	0.21113809458732616			7.01842	7303.68	VAQELEEK	231.21	216.69	143.66	181.86	161.93	176.47	166.33	222.07	181.48	220.2	151.33	126.55	180.27	133.47	199.54	203.85	143.82	126.62	218.9	154.55	113.12	108.16	110.01	144.26	128.06	132.89	121.85	158.65	271.07	268.39	118.67	82.533	124.5	106.05	90.451
91	Complement factor I	CFAI	P05156		[25]	0.005272063473963199	0.15747931460373832	0.42431926434896156	0.31719751083987535			75.183	75699.2	VFSLQWGEVK	232.21	182.25	298.9	292.78	245.53	241.87	291.24	295.35	310.06	306.96	235.29	230.9	185.27	175.91	246.77	243.3	215.51	216.76	204.46	209.51	160.85	153.45	220.93	223.86	191.97	185.91	166.41	170.4	335.32	335.83	210.22	207.79	161.13	158.55	149.29
92	Serum paraoxonase/lactonase 3	PON3	Q15166			0.005266074726845396	0.6164989587095157	0.7360138601784676	-0.08275927236349201			4.7317	4954.56	IQNVLSEKPR	3.1981	5.2623	37.373	31.244	35.484	29.242	51.123	37.116	56.583	57.209	25.919	42.744	43.079	41.716	35.756	31.008	26.66	36.377	29.317	31.39	29.254	23.898	31.648	28.733	28.315	33.126	42.034	37.939	47.635	44.377	39.791	53.764	35.358	40.4	34.567
93	Apolipoprotein(a)	APOA	P08519			0.005153015310613055	0.6714641348148289	0.7607243178237652	0.10214230819618476			4.98336	4759.97	TPAYYPNAGLIK	2.0474	3.5578	12.396	8.9921	17.778	21.33	3.8552	4.2835	4.7532	6.5868	6.2887	8.2281	6.3869	6.2733	2.3165	0.35322	NaN	NaN	7.1991	8.541	0.75435	0.88849	3.1383	1.8575	7.4299	4.8084	1.1842	2.7521	11.022	10.962	72.021	66.654	59.027	64.77	58.897
94	Complement C2	CO2	P06681		[25,26]	0.005060563623480573	0.6394230847380192	0.74727758095889	0.07083573208086634			5.39169	5146.67	HAFILQDTK	83.768	79.117	89.613	83.411	82.423	81.435	106.54	99.771	81.875	81.784	72.057	69.716	72.729	76.621	89.772	83.949	106.53	97.413	72.067	94.936	80.671	66.243	74.812	71.265	60.77	65.354	88.948	90.746	112.54	109.39	90.357	81.17	72.991	80.314	68.515
95	Complement C1s subcomponent	C1S	P09871		[25,26]	0.00495966903780087	0.81478873611904	0.8472694414673836	0.04672941862544486			49.4024	51793.9	TNFDNDIALVR	235.03	233.45	248.39	252.75	238.61	235.01	239.39	241.11	289.51	270.39	214.14	203.43	202.19	198.51	209.65	230.78	256.93	268.72	214.7	205.43	177.29	197.93	212.56	198.18	212	219.13	186.19	196.38	205.96	218.33	211.33	210.97	178.53	179.68	191.02
96	Apolipoprotein M	APOM	O95445		[45]	0.004551711099999107	0.41458826819215555	0.6091500178848017	0.178096908833631			9.70033	9509.14	AFLLTPR	451.67	482.8	518.02	491.26	557.84	538.04	528.13	497.12	497.41	481.53	572.72	592.31	591.73	572.45	629.44	627.59	794.5	822.57	348.82	359.86	515.09	476.56	260.19	254.78	475.4	474.35	347.26	362.78	489.68	489.36	496.21	504.4	432.5	453.39	401.52
97	Complement C1r subcomponent	C1R	P00736		[26]	0.004441630594535485	0.7650359978169621	0.8220557207398919	-0.04335585975999885			3.98453	3701.48	GLTLHLK	208.04	205.88	271.54	242.63	228.08	234.46	237.04	262.47	292.7	265.46	205.95	204.04	210.77	220.21	224.75	218.75	302.3	264.23	197.53	186.39	187.33	206.16	204.64	202.53	214.85	222.87	180.14	180.1	238.25	224.59	243.26	216.03	198.79	191.17	187.98
	Proteins excluded from consideration
98	78 kDa glucose-regulated protein	GRP78	P11021									14.9635	14929.5	ITPSYVAFTPEGER	4.3343	5.9456	5.5823	4.7906	5.4948	4.4657	2.9896	6.3385	4.0023	6.8936	3.8965	5.5585	4.4371	5.4937	6.9581	6.1983	6.4962	5.0627	7.8308	8.1021	5.2418	5.5606	6.012	4.9008	6.3287	5.7829	6.1431	4.4924	7.4748	6.635	7.1497	5.3115	6.8429	7.1896	4.1825
99	Antithrombin-III	ANT3	P01008		[25,26]							3.51945	3169.29	DDLYVSDAFHK	11896	11122	14034	14309	16142	15524	14349	14727	14108	13787	12562	12229	14830	14632	14990	15067	16320	16685	14367	13758	10619	11057	12915	12600	13266	12631	12215	12219	15596	14701	13492	13450	10733	10438	10606
100	Beta-Ala-His dipeptidase	Q96KN2	Q96KN2		[45]							15.4878	15380.4	ALEQDLPVNIK	NaN	NaN	12.951	5.6485	5.7317	NaN	NaN	NaN	NaN	NaN	NaN	NaN	NaN	NaN	5.4597	6.7975	NaN	NaN	NaN	NaN	NaN	NaN	NaN	NaN	NaN	NaN	NaN	NaN	6.12	NaN	NaN	NaN	NaN	NaN	NaN
101	Cadherin-13	CAD13	P55290									59.1605	60772.2	INENTGSVSVTR	NaN	NaN	NaN	NaN	NaN	1.9662	NaN	NaN	NaN	NaN	NaN	0.4843	NaN	NaN	NaN	NaN	NaN	NaN	NaN	NaN	NaN	0.10878	2.7856	NaN	NaN	NaN	2.2234	0.77081	NaN	NaN	NaN	NaN	NaN	NaN	NaN
102	Coagulation factor IX	FA9	P00740									70.3938	71143.6	SALVLQYLR	27.015	12.01	10.492	10.529	10.91	8.6108	12.856	12.91	8.0852	10.033	7.7607	7.0245	11.581	11.358	16.653	15.087	12.174	9.0872	15.678	11.621	5.9815	6.718	5.1946	7.7873	0	0	10.292	10.646	16.042	15.285	7.8416	7.0244	NaN	NaN	NaN
103	Coagulation factor V	FA5	P12259									52.7812	50601.3	SEAYNTFSER	15.324	13.658	14.628	19.21	8.9321	4.9746	13.806	11.874	12.777	15.936	15.153	14.357	15.703	19.056	9.9126	10.218	20.858	9.1083	16.994	15.066	12.4	15.654	0.47227	19.403	12.938	10.193	10.544	15.359	17.165	25.471	14.217	27	20.543	20.633	10.778
104	Coagulation factor VIII	FA8	P00451									98.8527	97611.1	LHPTHYSIR	241.21	NaN	NaN	NaN	NaN	NaN	NaN	NaN	NaN	NaN	NaN	NaN	NaN	NaN	NaN	NaN	NaN	NaN	NaN	NaN	NaN	NaN	NaN	NaN	NaN	NaN	NaN	NaN	NaN	NaN	NaN	NaN	NaN	NaN	NaN
105	Complement component C7	CO7	P10643									291.324	290530	LIDQYGTHYLQSGSLGGEYR	259.35	51.463	NaN	NaN	5.1602	NaN	NaN	NaN	NaN	NaN	28.053	44.993	NaN	NaN	NaN	NaN	NaN	NaN	28.658	15.518	NaN	NaN	NaN	NaN	NaN	NaN	NaN	NaN	46.691	77.182	NaN	NaN	NaN	NaN	NaN
106	Corticosteroid-binding globulin	CBG	P08185		[25]							2548.45	2.5683e+06	WSAGLTSSQVDLYIPK	205.95	126.51	226.78	223.01	170.76	179.98	201.09	197.97	197.62	199.75	250.17	213.43	121.16	159.42	279.17	279.21	164.18	159.51	92.219	92.26	25.723	57.929	67.35	82.543	167.78	194.17	105.31	103.01	206.75	205.78	172.78	202.74	120.99	128.25	106.01
107	Endothelial protein C receptor	EPCR	Q9UNNB									12.5434	12684.4	TLAFPLTIR	0.44309	NaN	0.29753	NaN	NaN	NaN	NaN	NaN	0.64309	NaN	NaN	NaN	NaN	1.1392	0.20493	1.2799	NaN	NaN	0.37966	NaN	NaN	NaN	NaN	NaN	NaN	NaN	NaN	0.57945	5.1832	5.1214	NaN	NaN	NaN	NaN	NaN
108	Galectin-3-binding protein	LG3BP	Q08380		[42]							61.948	62991.5	SDLAVPSELALLK	1.5385	NaN	NaN	NaN	NaN	NaN	NaN	NaN	NaN	NaN	NaN	NaN	NaN	NaN	NaN	NaN	NaN	NaN	NaN	NaN	NaN	NaN	NaN	NaN	NaN	NaN	NaN	NaN	NaN	NaN	NaN	NaN	NaN	NaN	NaN
109	Hepatocyte growth factor-like protein	HGFL	P26927									51.3606	50815.4	SPLNDFQVLR	NaN	NaN	NaN	NaN	NaN	NaN	NaN	NaN	NaN	NaN	NaN	NaN	NaN	NaN	NaN	NaN	NaN	NaN	NaN	NaN	NaN	NaN	NaN	NaN	NaN	NaN	NaN	NaN	NaN	NaN	NaN	NaN	NaN	NaN	NaN
110	Insulin-like growth factor I	IGF1	P05019									35.8216	36002.7	GFYFNKPTGYGSSSR	0.90748	5.6796	NaN	NaN	NaN	NaN	1.8623	NaN	2.2733	1.7278	NaN	NaN	NaN	NaN	5.1907	7.5263	NaN	NaN	NaN	1.2424	NaN	NaN	0.17617	1.7932	NaN	NaN	NaN	NaN	7.0395	3.4681	NaN	NaN	NaN	NaN	NaN
111	Intercellular adhesion molecule 1	ICAM1	P05362		[25,26]							10.5021	10468.8	LLGIETPLPK	2.1826	NaN	0.57778	0.79653	NaN	NaN	NaN	0.87534	1.0486	1.3279	0.71664	0.012256	0.31249	1.0205	NaN	0.36736	NaN	NaN	0.87082	NaN	NaN	NaN	NaN	NaN	NaN	NaN	NaN	NaN	NaN	NaN	0.56168	0.28915	NaN	NaN	NaN
112	Keratin type I cytoskeletal 10	K1C10	P13645									917.867	880588	SLLEGEGSSGGGGR	1.8944	NaN	NaN	NaN	NaN	NaN	NaN	NaN	NaN	NaN	NaN	NaN	NaN	NaN	NaN	NaN	NaN	NaN	4.7656	NaN	NaN	3.5996	NaN	NaN	NaN	NaN	NaN	NaN	NaN	NaN	NaN	NaN	NaN	NaN	NaN
113	Keratin-type II cytoskeletal 2 epidermal	K22E	P35908									328.595	322446	YEELQVTVGR	NaN	NaN	NaN	NaN	NaN	NaN	NaN	NaN	NaN	NaN	NaN	NaN	NaN	NaN	NaN	NaN	NaN	NaN	NaN	NaN	NaN	NaN	NaN	NaN	NaN	NaN	NaN	NaN	NaN	NaN	NaN	NaN	NaN	NaN	NaN
114	Mannan-binding lectin serine protease 2	MASP2	O00187									64.4613	65431.1	WPEPVFGR	NaN	NaN	NaN	NaN	NaN	NaN	NaN	NaN	NaN	NaN	NaN	NaN	NaN	NaN	NaN	NaN	NaN	NaN	NaN	NaN	NaN	NaN	NaN	NaN	NaN	NaN	1.028	1.1924	2.6234	4.7007	NaN	NaN	NaN	NaN	NaN
115	Myeloblastin	PRTN3	P24158									98.1098	94641.4	LVNVVLGAHNVR	8.0567	NaN	NaN	NaN	NaN	NaN	NaN	NaN	NaN	NaN	NaN	NaN	NaN	NaN	NaN	NaN	NaN	NaN	NaN	NaN	NaN	NaN	NaN	NaN	NaN	NaN	NaN	NaN	NaN	NaN	NaN	NaN	NaN	NaN	NaN
116	Protein AMBP	AMBP	P02760		[25]							172.622	176974	HHGPTITAK	NaN	NaN	427.98	NaN	174.89	32.036	970.85	NaN	NaN	3055.8	191.27	NaN	1974.7	NaN	NaN	NaN	1513.7	887.93	4497.2	NaN	NaN	NaN	NaN	NaN	208.99	NaN	NaN	NaN	1260.9	412.85	NaN	3114.3	NaN	NaN	NaN
117	Protein Z-dependent protease inhibitor	ZPI	Q9UK55									56.0988	56322	ETSNFGFSLLR	5.5025	0.074756	7.5449	10.464	NaN	NaN	10.453	8.935	13.598	12.559	5.9013	3.7986	8.6151	10.075	13.365	13.013	10.386	12.978	9.9195	10.473	5.8762	3.6261	5.667	4.2972	5.0232	5.0803	1.6589	1.3698	6.9003	8.628	1.619	5.1122	3.6392	3.0818	1.8789
118	SPARC	SPRC	P09486									10.179	10050	LEAGDHPVELLAR	NaN	NaN	NaN	NaN	NaN	NaN	NaN	NaN	NaN	NaN	NaN	NaN	NaN	NaN	NaN	NaN	NaN	NaN	NaN	NaN	NaN	NaN	NaN	NaN	NaN	NaN	NaN	0.58654	NaN	NaN	NaN	NaN	NaN	NaN	NaN
119	Tenascin-X | Putative tenascin-XA	TENX	P22105									10.4931	10707.9	ILISGLEPSTPYR	3.1657	0.54838	1.5647	1.4435	1.8767	0.50578	NaN	3.3905	2.7577	2.7352	2.7059	3.4461	1.1803	2.3811	0.31918	2.824	0.59777	0.8223	0.99621	0.10164	1.6452	4.0631	1.2033	0.57113	3.1299	2.4272	0.85518	0.69511	2.8465	1.9465	2.0029	0.63185	0.26015	0.61793	0
120	Thrombospondin-4	TSP4	P35443									43.05	39066.3	KPQDFLEELK	NaN	NaN	NaN	NaN	NaN	NaN	NaN	NaN	NaN	NaN	NaN	NaN	NaN	NaN	NaN	NaN	NaN	0.45575	NaN	NaN	NaN	NaN	NaN	NaN	NaN	NaN	NaN	NaN	NaN	NaN	NaN	2.524	NaN	NaN	NaN
121	Tissue factor pathway inhibitor (isoform 1)	TFPI1	P10646									7.53893	7920.9	FYYNSVIGK	0.62409	NaN	NaN	NaN	NaN	NaN	NaN	NaN	NaN	NaN	NaN	NaN	NaN	NaN	NaN	NaN	NaN	NaN	NaN	NaN	NaN	NaN	NaN	NaN	NaN	NaN	NaN	NaN	NaN	NaN	NaN	NaN	NaN	NaN	NaN
122	Tissue-type plasminogen activator	TPA	P00750									93.4103	88346.1	VVPGEEEQK	NaN	NaN	NaN	5.9333	3.6258	3.8546	2.8749	NaN	NaN	NaN	NaN	NaN	1.9105	NaN	NaN	3.7802	2.6041	6.8008	NaN	NaN	NaN	NaN	1.5541	NaN	NaN	2.8055	NaN	1.4021	1.3044	NaN	NaN	9.5927	1.9877	NaN	NaN
123	Transferrin receptor protein 1	TFR1	P02786									25.9998	25523	GFVEPDHYVVVGAQR	2.9716	0.040566	NaN	NaN	7.819	3.7483	5.4804	4.0513	NaN	NaN	3.3849	4.8764	2.3692	3.1662	0.71833	2.7204	0.53807	1.0739	4.2539	1.3326	NaN	NaN	NaN	NaN	1.1208	1.0831	4.6629	NaN	4.0637	4.5236	NaN	NaN	NaN	NaN	NaN
124	Vasorin	VASN	Q6EMK4									29.4796	26109	ESHVTLASPEETR	3.4544	10.407	6.2893	8.4965	5.7247	6.1558	6.6517	5.7259	5.2875	8.9194	2.9617	4.4106	8.278	3.5361	11.771	6.3431	6.4469	6.6258	3.979	9.968	8.7844	6.7795	4.8788	4.9434	9.174	7.0294	4.218	6.1872	9.7346	15.622	6.2992	3.5479	5.0706	6.7249	6.9199
125	Vitamin K-dependent protein Z	PROZ	P22891									38.5595	38346.3	GLLSGWAR	NaN	NaN	9.7643	4.6596	NaN	NaN	8.1287	4.0842	5.9465	7.6641	6.3188	3.1771	23.069	22.428	26.315	26.996	16.488	17.499	18.146	14.827	16.364	14.44	7.5517	5.1879	7.3429	5.8387	4.0691	3.7538	0	1.9602	9.2232	4.7082	1.844	2.3562	2.8627
[truncated: 264 more columns]
