# Supplementary material for: Prognosis of Alzheimer’s Disease Using Quantitative Mass Spectrometry of Human Blood Plasma Proteins and Machine Learning
Source: Int J Mol Sci. 2022 Jul 18;23(14):7907. doi: 10.3390/ijms23147907 (PMC9318764; doi:10.3390/ijms23147907)
Supplement: Supplementary file 1 [file ijms-23-07907-s001.zip › Supplementary-Table-S3.xlsx]

## Sheet: Table S3
Supplementary Table S3. Hyperparameters used for building the classifiers
Random forest		AdaBoost		Bagging		XGBoost
n_estimators	25, 50, 100, 200	learning_rate	0.001, 0.01, 0.1, 1, 10	n_estimators	25, 50, 100, 200	eta	0.01 , 0.2575, 0.505 , 0.7525, 1.
criterion	gini', 'entropy'	n_estimators	25, 50, 100, 200			gamma	0.5, 1, 2
min_samples_split	2,4,5					max_depth	2, 7, 12, 17, 22
min_samples_leaf	1,2,3					lambda	0.01 , 0.5075, 1.005 , 1.5025, 2.
bootstrap	True					sampling_method	'uniform', 'gradient_based'
