# Supplementary material for: Prognosis of Alzheimer’s Disease Using Quantitative Mass Spectrometry of Human Blood Plasma Proteins and Machine Learning
Source: Int J Mol Sci. 2022 Jul 18;23(14):7907. doi: 10.3390/ijms23147907 (PMC9318764; doi:10.3390/ijms23147907)
Supplement: Supplementary file 1 [file ijms-23-07907-s001.zip › Supplementary-Table-S4.xlsx]

## Sheet:  Table S4
Supplementary Table S4. Metrics obtained for different classifiers
Classifier	Inclusion of APOE genotype	Set	AUC-ROC		Accuracy		Sensitivity		Specifciity		F1
			Mean	SD	Mean	SD	Mean	SD	Mean	SD	Mean	SD			Paramseters
AdaBoost	No	Set-16	0.9257098765432099	0.12564209740405935	0.8	0.12564209740405935	0.7944444444444445	0.12564209740405935	0.8133333333333332	0.12564209740405935	0.7977654698242933	0.12564209740405935			{'learning_rate': 1, 'n_estimators': 200, 'random_state': 25}
Random forest	No	Set-31	0.9256172839506173	0.08734403445100894	0.788888888888889	0.08734403445100894	0.7444444444444445	0.08734403445100894	0.8355555555555554	0.08734403445100894	0.7651637578108167	0.08734403445100894			{'bootstrap': True, 'criterion': 'entropy', 'min_samples_leaf': 1, 'min_samples_split': 4, 'n_estimators': 25, 'random_state': 25}
Random forest	No	Set-25	0.9143827160493828	0.12264218003973325	0.7333333333333333	0.12264218003973325	0.7444444444444444	0.12264218003973325	0.731111111111111	0.12264218003973325	0.7249847765193034	0.12264218003973325			{'bootstrap': True, 'criterion': 'entropy', 'min_samples_leaf': 2, 'min_samples_split': 2, 'n_estimators': 100, 'random_state': 25}
Random forest	No	Set-16	0.9033024691358025	0.11662378107365562	0.7444444444444445	0.11662378107365562	0.7944444444444445	0.11662378107365562	0.7088888888888889	0.11662378107365562	0.7462511778166644	0.11662378107365562			{'bootstrap': True, 'criterion': 'entropy', 'min_samples_leaf': 2, 'min_samples_split': 2, 'n_estimators': 200, 'random_state': 25}
Random forest	No	Set-28	0.8983024691358026	0.0995286159955726	0.7555555555555555	0.0995286159955726	0.7472222222222221	0.0995286159955726	0.7755555555555554	0.0995286159955726	0.7447326756789672	0.0995286159955726			{'bootstrap': True, 'criterion': 'entropy', 'min_samples_leaf': 3, 'min_samples_split': 2, 'n_estimators': 50, 'random_state': 25}
AdaBoost	No	Set-25	0.8959567901234567	0.16576656750576477	0.7666666666666667	0.16576656750576477	0.6972222222222222	0.16576656750576477	0.8355555555555554	0.16576656750576477	0.7255429864253393	0.16576656750576477			{'learning_rate': 0.1, 'n_estimators': 200, 'random_state': 25}
Bagging	No	Set-28	0.8957870370370371	0.0779304934781316	0.7777777777777778	0.0779304934781316	0.8388888888888889	0.0779304934781316	0.7266666666666666	0.0779304934781316	0.7804201680672269	0.0779304934781316			{'n_estimators': 100, 'random_state': 25}
AdaBoost	No	Set-28	0.8933333333333333	0.16936712992065525	0.7444444444444444	0.16936712992065525	0.7222222222222222	0.16936712992065525	0.7733333333333333	0.16936712992065525	0.7229755538579068	0.16936712992065525			{'learning_rate': 1, 'n_estimators': 200, 'random_state': 25}
XBoost	No	Set-25	0.89070987654321	0.10775089638846136	0.7777777777777778	0.10775089638846136	0.7694444444444445	0.10775089638846136	0.7933333333333332	0.10775089638846136	0.7662528647822766	0.10775089638846136			{'eta': 0.505, 'gamma': 1, 'lambda': 0.01, 'max_depth': 2, 'n_estimator': 'gbtree', 'random_state': 25, 'sampling_method': 'uniform', 'silent': 1}
Bagging	No	Set-25	0.8871450617283951	0.10834866627949216	0.7555555555555556	0.10834866627949216	0.7472222222222221	0.10834866627949216	0.7711111111111111	0.10834866627949216	0.7431225121627598	0.10834866627949216			{'n_estimators': 25, 'random_state': 25}
Bagging	No	Set-31	0.8835030864197531	0.10784986120595427	0.7555555555555556	0.10784986120595427	0.7916666666666666	0.10784986120595427	0.731111111111111	0.10784986120595427	0.7552707856598018	0.10784986120595427			{'n_estimators': 100, 'random_state': 25}
XBoost	No	Set-16	0.8810493827160494	0.10776433513661951	0.7333333333333333	0.10776433513661951	0.7055555555555555	0.10776433513661951	0.7711111111111111	0.10776433513661951	0.7123809523809523	0.10776433513661951			{'eta': 0.2575, 'gamma': 0.5, 'lambda': 0.01, 'max_depth': 2, 'n_estimator': 'gbtree', 'random_state': 25, 'sampling_method': 'uniform', 'silent': 1}
XBoost	No	Set-28	0.8784259259259259	0.13770197993774022	0.7333333333333333	0.13770197993774022	0.7277777777777777	0.13770197993774022	0.7488888888888888	0.13770197993774022	0.7180438842203548	0.13770197993774022			{'eta': 0.2575, 'gamma': 0.5, 'lambda': 1.005, 'max_depth': 7, 'n_estimator': 'gbtree', 'random_state': 25, 'sampling_method': 'uniform', 'silent': 1}
Bagging	No	Set-16	0.8772067901234568	0.07318804787512709	0.7666666666666666	0.07318804787512709	0.7944444444444445	0.07318804787512709	0.7511111111111111	0.07318804787512709	0.76849376114082	0.07318804787512709			{'n_estimators': 100, 'random_state': 25}
AdaBoost	No	Set-31	0.861111111111111	0.12736820717782463	0.7555555555555555	0.12736820717782463	0.7222222222222222	0.12736820717782463	0.788888888888889	0.12736820717782463	0.7309093812963783	0.12736820717782463			{'learning_rate': 0.1, 'n_estimators': 200, 'random_state': 25}
XBoost	No	Set-31	0.8607407407407408	0.1497302521206078	0.6888888888888888	0.1497302521206078	0.7416666666666666	0.1497302521206078	0.6466666666666667	0.1497302521206078	0.6868253968253968	0.1497302521206078			{'eta': 0.505, 'gamma': 0.5, 'lambda': 1.005, 'max_depth': 2, 'n_estimator': 'gbtree', 'random_state': 25, 'sampling_method': 'uniform', 'silent': 1}
Bagging	No	Set-17 CB	0.7818827160493826	0.07291474297401496	0.6849673202614379	0.07291474297401496	0.7	0.07291474297401496	0.6711111111111111	0.07291474297401496	0.6736291486291487	0.07291474297401496			{'n_estimators': 50, 'random_state': 25}
Random forest	No	Set-17 CB	0.7770061728395061	0.09354410939114473	0.6973856209150326	0.09354410939114473	0.7	0.09354410939114473	0.6911111111111111	0.09354410939114473	0.6830769230769231	0.09354410939114473			{'bootstrap': True, 'n_estimators': 1000, 'random_state': 25}
XBoost	No	Set-17 CB	0.7758024691358025	0.05654448612875199	0.673202614379085	0.05654448612875199	0.6805555555555556	0.05654448612875199	0.6711111111111111	0.05654448612875199	0.6642857142857143	0.05654448612875199			{'eta': 0.505, 'gamma': 0.5, 'lambda': 0.01, 'max_depth': 7, 'n_estimator': 'gbtree', 'random_state': 25, 'sampling_method': 'uniform', 'silent': 1}
AdaBoost	No	Set-17 CB	0.7554012345679013	0.11843233503677086	0.6300653594771243	0.11843233503677086	0.611111111111111	0.11843233503677086	0.6466666666666667	0.11843233503677086	0.5945054945054945	0.11843233503677086			{'learning_rate': 0.01, 'n_estimators': 100, 'random_state': 25}
Random forest	Yes	Set-31	0.8484259259259261	0.14353901220212173	0.45555555555555555	0.14353901220212173	0.7194444444444444	0.14353901220212173	0.8133333333333332	0.14353901220212173	0.7300854700854702	0.14353901220212173			{'bootstrap': True, 'criterion': 'entropy', 'min_samples_leaf': 1, 'min_samples_split': 5, 'n_estimators': 25, 'random_state': 25}
XBoost	Yes	Set-31	0.845895061728395	0.18977348579889539	0.47777777777777775	0.18977348579889539	0.7166666666666666	0.18977348579889539	0.6244444444444446	0.18977348579889539	0.653826043237808	0.18977348579889539			{'eta': 0.505, 'gamma': 0.5, 'lambda': 1.005, 'max_depth': 2, 'n_estimator': 'gbtree', 'random_state': 25, 'sampling_method': 'uniform', 'silent': 1}
AdaBoost	Yes	Set-31	0.8463271604938271	0.15036497128845192	0.3888888888888889	0.15036497128845192	0.7222222222222222	0.15036497128845192	0.7066666666666667	0.15036497128845192	0.6923809523809523	0.15036497128845192			{'learning_rate': 0.1, 'n_estimators': 200, 'random_state': 25}
Bagging	Yes	Set-31	0.8660802469135802	0.10717995046569742	0.4333333333333333	0.10717995046569742	0.8138888888888889	0.10717995046569742	0.7288888888888889	0.10717995046569742	0.7663007786846796	0.10717995046569742			{'n_estimators': 200, 'random_state': 25}
Random forest	Yes	Set-25	0.8795216049382715	0.08804013809940729	0.45555555555555555	0.08804013809940729	0.725	0.08804013809940729	0.7711111111111111	0.08804013809940729	0.7280672268907563	0.08804013809940729			{'bootstrap': True, 'criterion': 'entropy', 'min_samples_leaf': 1, 'min_samples_split': 2, 'n_estimators': 50, 'random_state': 25}
XBoost	Yes	Set-25	0.858611111111111	0.10848716557298795	0.42222222222222217	0.10848716557298795	0.8138888888888889	0.10848716557298795	0.7044444444444444	0.10848716557298795	0.7543797997667967	0.10848716557298795			{'eta': 0.505, 'gamma': 1, 'lambda': 0.01, 'max_depth': 2, 'n_estimator': 'gbtree', 'random_state': 25, 'sampling_method': 'uniform', 'silent': 1}
AdaBoost	Yes	Set-25	0.9033641975308642	0.18221415760325807	0.4666666666666667	0.18221415760325807	0.7916666666666666	0.18221415760325807	0.8133333333333332	0.18221415760325807	0.7815686274509804	0.18221415760325807			{'learning_rate': 0.1, 'n_estimators': 200, 'random_state': 25}
Bagging	Yes	Set-25	0.8598456790123457	0.054601500812575254	0.4333333333333334	0.054601500812575254	0.7722222222222223	0.054601500812575254	0.6888888888888888	0.054601500812575254	0.7283461210571185	0.054601500812575254			{'n_estimators': 25, 'random_state': 25}
Random forest	Yes	Set-16	0.8784722222222223	0.10423515747864495	0.5333333333333333	0.10423515747864495	0.7472222222222222	0.10423515747864495	0.6866666666666666	0.10423515747864495	0.707055852644088	0.10423515747864495			{'bootstrap': True, 'criterion': 'entropy', 'min_samples_leaf': 1, 'min_samples_split': 2, 'n_estimators': 100, 'random_state': 25}
XBoost	Yes	Set-16	0.8638271604938271	0.18255343592892043	0.5222222222222223	0.18255343592892043	0.725	0.18255343592892043	0.7711111111111111	0.18255343592892043	0.718655462184874	0.18255343592892043			{'eta': 0.2575, 'gamma': 0.5, 'lambda': 0.01, 'max_depth': 2, 'n_estimator': 'gbtree', 'random_state': 25, 'sampling_method': 'uniform', 'silent': 1}
AdaBoost	Yes	Set-16	0.9157407407407406	0.12220681746402406	0.45555555555555555	0.12220681746402406	0.7694444444444445	0.12220681746402406	0.8133333333333332	0.12220681746402406	0.7801830522418758	0.12220681746402406			{'learning_rate': 1, 'n_estimators': 200, 'random_state': 25}
Bagging	Yes	Set-16	0.8896604938271606	0.07319574147269621	0.45555555555555555	0.07319574147269621	0.8166666666666667	0.07319574147269621	0.7066666666666666	0.07319574147269621	0.7621212121212121	0.07319574147269621			{'n_estimators': 100, 'random_state': 25}
Random forest	Yes	Set-28	0.9057098765432098	0.11370020712969081	0.5222222222222223	0.11370020712969081	0.8111111111111111	0.11370020712969081	0.7688888888888888	0.11370020712969081	0.774529082888216	0.11370020712969081			{'bootstrap': True, 'criterion': 'entropy', 'min_samples_leaf': 2, 'min_samples_split': 5, 'n_estimators': 100, 'random_state': 25}
XBoost	Yes	Set-28	0.8436728395061728	0.08817298177418595	0.39999999999999997	0.08817298177418595	0.7694444444444445	0.08817298177418595	0.6644444444444444	0.08817298177418595	0.7140874351266059	0.08817298177418595			{'eta': 0.505, 'gamma': 1, 'lambda': 0.01, 'max_depth': 2, 'n_estimator': 'gbtree', 'random_state': 25, 'sampling_method': 'uniform', 'silent': 1}
AdaBoost	Yes	Set-28	0.9008950617283951	0.1740724980228101	0.4666666666666667	0.1740724980228101	0.7916666666666666	0.1740724980228101	0.7911111111111111	0.1740724980228101	0.7711111111111111	0.1740724980228101			{'learning_rate': 0.1, 'n_estimators': 200, 'random_state': 25}
Bagging	Yes	Set-28	0.874675925925926	0.09910381349962806	0.4444444444444445	0.09910381349962806	0.8138888888888889	0.09910381349962806	0.731111111111111	0.09910381349962806	0.7706007442849548	0.09910381349962806			{'n_estimators': 25, 'random_state': 25}
