# Supplementary material for: Prognosis of Alzheimer’s Disease Using Quantitative Mass Spectrometry of Human Blood Plasma Proteins and Machine Learning
Source: Int J Mol Sci. 2022 Jul 18;23(14):7907. doi: 10.3390/ijms23147907 (PMC9318764; doi:10.3390/ijms23147907)
Supplement: Supplementary file 1 [file ijms-23-07907-s001.zip › Supplementary-Table-S6.xlsx]

## Sheet: Table S5
Supplementary Table S6. Results of statistical analysis of FTD and VD groups versus AD and control groups
Only proteins with uncorrected p-values ≤0.05 are shown.
Proteins with p-values ≤0.01
	AD vs FTD			control vs FTD			AD vs VD			Control vs VD
	p-value	FDR	Cohen's d	p-value	FDR	Cohen's d	p-value	FDR	Cohen's d	p-value	FDR	Cohen's d
Apolipoprotein E	0.00273579416857083	0.24287257280797186	-1.0467714579769007
Serum paraoxonase/arylesterase 1	0.00387451362901693	0.24287257280797186	-0.943549133062713
Cathelicidin antimicrobial peptide	0.0042700021318653	0.24287257280797186	-0.610392895511374
Apolipoprotein C-IV	0.00470120178266169	0.24287257280797186	-0.7240920636255963
Apolipoprotein B-100	0.00653226319754239	0.24287257280797186	0.7152511212364853	0.0511608192703511	0.29486686795738803	0.48088144251687304
Coagulation factor X	0.00820157063576571	0.24287257280797186	-0.7186377697442822
Apolipoprotein A-I							0.00821518415624503	0.24287257280797186	-0.8734006909333536	0.0302047379929679	0.2604319631393683	-0.3590524103136445
Alpha-2-HS-glycoprotein							0.0144679826692179	0.24287257280797186	0.8736190168890452	0.00829195574663491	0.24287257280797186	0.9526735428214453
Alpha-1-antitrypsin										0.00953898882588483	0.24287257280797186	-0.8713280550679146
Cholinesterase										0.00953898882588483	0.24287257280797186	0.9900580721562483
Adiponectin	0.0328138780285928	0.2767779277194355	0.5835433838633993	0.0100026560565777	0.24287257280797186	0.6830778123200271
Beta-2-glycoprotein 1	0.0102346032545197	0.24287257280797186	0.7402733420481917	0.0138346008163516	0.24287257280797186	0.9633306145413411				0.0500171111361357	0.29486686795738803	-0.8196773664869144
Glutathione peroxidase 3	0.0102346032545197	0.24287257280797186	0.6133368262409239	0.0205695019441721	0.24808672290419936	0.6621460392722298
Apolipoprotein C-I	0.0106902452610929	0.24287257280797186	-0.7560259093005518	0.0409078484676432	0.29486686795738803	-0.5852334402059058
Vascular cell adhesion protein 1				0.010989430708222	0.24287257280797186	-0.671811205956626				0.0474015090845806	0.29486686795738803	-0.6207387724936082
Retinol-binding protein 4							0.0258495891076179	0.24808672290419936	-0.5083331045665518	0.0117164493879585	0.24287257280797186	-0.7167886383560852
Afamin				0.0126281412122519	0.24287257280797186	0.49070969803504494				0.0500171111361357	0.29486686795738803	0.6128901356268275
Phospholipid transfer protein							0.0128040667693355	0.24287257280797186	-0.804647982524729	0.0143129548530041	0.24287257280797186	-0.7339171531845453
Coagulation factor XII							0.0136141018541698	0.24287257280797186	-0.7872514464667419	0.0197424616197785	0.24808672290419936	-0.7472490060742092
Ig mu chain C region	0.0144027815414931	0.24287257280797186	-0.5352134413649686
Carbonic anhydrase 1							0.0244476820879575	0.24808672290419936	-0.8719403943348183	0.0152821448954683	0.24287257280797186	-0.5503552701701908
Apolipoprotein D	0.015649005979895	0.24287257280797186	0.5804076594736205	0.0409078484676432	0.29486686795738803	0.4501687853010047
Transthyretin				0.0172936752209402	0.24808672290419936	-0.5135445380346778
Fibulin-1							0.0173115340311107	0.24808672290419936	-0.9375335390636832
Apolipoprotein L1										0.0185347481055915	0.24808672290419936	0.6998493957199824
Complement factor I	0.0207648087812172	0.24808672290419936	-0.7040164836570765
Vitronectin	0.0282793217602442	0.2603718098855453	-0.421555141130311							0.0237734708628684	0.24808672290419936	0.5956986100027478
Clusterin	0.0242788618901475	0.24808672290419936	-0.5907644289176883	0.0530532726810872	0.29486686795738803	-0.446962203240867
Apolipoprotein A-IV	0.0252300917271736	0.24808672290419936	-0.5915932530687711				0.0589447021551585	0.29486686795738803	-0.904101207453813
Complement factor B	0.0252315422793958	0.24808672290419936	-0.6413699790139492
Complement C1r subcomponent-like protein	0.0262153495852375	0.24808672290419936	-0.48067125114015175							0.0252623439849566	0.24808672290419936	0.7543813281446599
Complement C1q subcomponent subunit B	0.0262153495852375	0.24808672290419936	0.5138228127886342
Alpha-1-acid glycoprotein 1							0.0288556387244289	0.2603718098855453	0.6142208237533788
Kininogen-1										0.0302018309693103	0.2604319631393683	0.6561409994552521
Plasma protease C1 inhibitor										0.0339257409083301	0.2800678185623851	-0.5807463987116556
Adipocyte plasma membrane-associated protein				0.0350489729462623	0.28331253131562073	-0.5251720733337942
Hemoglobin subunit alpha										0.035923111037197	0.28445238943739704	-0.3192783092250207
Biotinidase				0.0378860761509204	0.2882313244422969	0.5273874195289411
Plasminogen activator inhibitor 1				0.0378860761509204	0.2882313244422969	-0.25939131256467957
Complement C2							0.0417459227225025	0.29486686795738803	-0.5826690763049321	0.0500171111361357	0.29486686795738803	-0.5729870183490899
Complement C1q subcomponent subunit C				0.0424904735855556	0.29486686795738803	-0.502771095978877
Tenascin	0.0436828	0.29486686795738803	-0.46714290856209734
Fetuin-B	0.0468117	0.29486686795738803	-0.4268088009378609
Alpha-1B-glycoprotein										0.0474015090845806	0.29486686795738803	-0.5890956482767311
Interleukin-10				0.0493224770321593	0.29486686795738803	0.4340459117693776
