# Supplementary material for: Prognosis of Alzheimer’s Disease Using Quantitative Mass Spectrometry of Human Blood Plasma Proteins and Machine Learning
Source: Int J Mol Sci. 2022 Jul 18;23(14):7907. doi: 10.3390/ijms23147907 (PMC9318764; doi:10.3390/ijms23147907)
Supplement: Supplementary file 1 [file ijms-23-07907-s001.zip › Supplementary_Table-S1_rev.xlsx]

## Sheet: Table S1
Supplementary Table S1. Participant data
Number of participants in groups	Participant's ID	Group	Gender	APOE genotype	Year of birth	Age	Sample date	Dementia stage	Year of diagnosis	MMSE	CDT	BNT	LMWT NM	LMWT DM	MDRS Suond acc.	MDRS Categor. ass.	Basic therapy	Comorbidities
1	3	Control	F	e3/e3	1956	60	11.07.2016	Not appl.	Not appl.	30	10	55	8	7	20	20	Not appl.	0	Control
2	4	Control	F	e3/e3	1958	58	11.07.2016	Not appl.	Not appl.	30	10	55	9	7	20	20	Not appl.	0
3	5	Control	F	e3/e3	1955	61	11.07.2016	Not appl.	Not appl.	30	10	55	8	7	20	20	Not appl.	0		Comorbidities:
4	11	Control	F	e3/e3	1948	68	13.07.2016	Not appl.	Not appl.	30	10	55	9	7	20	20	Not appl.	1		0 - No comorbidities
5	13	Control	F	e3/e3	1949	67	13.07.2016	Not appl.	Not appl.	30	10	55	8	7	20	20	Not appl.	1		1 - cardiovascular pathologies
6	17	Control	F	e3/e3	1950	66	21.07.2016	Not appl.	Not appl.	30	10	55	9	7	20	20	Not appl.	1		2 - diabetes mellitus
7	23	Control	F	e2/e3	1944	73	19.01.2018	Not appl.	Not appl.	30	10	54	8	9	19	20	Not appl.	1		3 - gastrointestinal tract pathologies
8	28	Control	F	e3/e3	1938	79	28.04.2018	Not appl.	Not appl.	30	9	54	8	8	18	20	Not appl.	1		4 - genitourinary system pathologies
9	37	Control	F	e3/e3	1946	72	30.05.2018	Not appl.	Not appl.	30	10	54	9	8	18	20	Not appl.	1		5 - thyroid disease
9	37A	Control	F	e3/e3	1946	75	26.11.2020	Not appl.	Not appl.	30	10	53	8	7	19	20	Not appl.	1		6 - eye diseases
9	37B	Control	F	e3/e3	1946	76	31.03.2022	Not appl.	Not appl.	30	10	55	10	9	17	20	Not appl.	1		7 -benign tumors and after removal
10	45	Control	F	e3/e3	1971	47	17.07.2018	Not appl.	Not appl.	30	9	49	6	4	15	16	Not appl.	0		8 - joints, injuries
11	48	Control	M	e3/e3	1950	68	19.07.2018	Not appl.	Not appl.	29	10	50	7	5	15	18	Not appl.	1		9 - lung diseases
11	48A	Control	M	e3/e3	1950	69	23.10.2019	Not appl.	Not appl.	29	10	51	8	5	18	20	Not appl.	1		10 - after COVID
12	50	Control	M	e3/e3	1965	53	19.07.2018	Not appl.	Not appl.	30	10	54	9	7	20	20	Not appl.	0
13	64	Control	F	e3/e4	1967	51	05.09.2019	Not appl.	Not appl.	30	10	52	9	7	20	20	Not appl.	5.7
13	64A	Control	F	e3/e4	1967	53	2021-02-03	Not appl.	Not appl.	30	10	55	9	8	20	20	Not appl.	5.7
14	67	Control	M	e2/e3	1967	52	15.10.2019	Not appl.	Not appl.	30	10	54	8	6	20	20	Not appl.	4
15	69	Control	F	e2/e3	1940	79	15.10.2019	Not appl.	Not appl.	30	10	50	8	5	18	20	Not appl.	1
16	71	Control	F	e3/e3	1945	74	22.10.2019	Not appl.	Not appl.	29	10	53	9	9	21	20	Not appl.	6, 9
17	72	Control	M	e2/e4	1943	75	22.10.2019	Not appl.	Not appl.	29	10	54	4	4	14	16	Not appl.	1, 6
18	73	Control	F	e3/e3	1942	77	22.10.2019	Not appl.	Not appl.	28	9	50	7	3	14	16	Not appl.	1,6,8
19	74	Control	M	e3/e3	1951	67	22.10.2019	Not appl.	Not appl.	30	10	55	7	5	19	24	Not appl.	1
20	75	Control	M	e3/e3	1944	75	22.10.2019	Not appl.	Not appl.	27	10	51	6	4	11	17	Not appl.	3,6,8
21	76	Control	F	e3/e3	1949	69	22.10.2019	Not appl.	Not appl.	29	10		7	9	16	24	Not appl.	1,3
22	77	Control	F	e3/e3	1939	80	22.10.2019	Not appl.	Not appl.	29	10	53	7	7	14	20	Not appl.	1
23	78	Control	F	e3/e3	1944	74	22.10.2019	Not appl.	Not appl.	29	10	52	8	8	10	20	Not appl.	5.7
24	79	Control	M	e3/e3	1951	67	22.10.2019	Not appl.	Not appl.	29	10	54	8	9	16	21	Not appl.	1,3,4
25	80	Control	M	e3/e3	1957	62	22.10.2019	Not appl.	Not appl.	30	9	53	9	6	20	19	Not appl.	1,3
26	81	Control	M	e2/e3	1947	71	22.10.2019	Not appl.	Not appl.	30	10	54	6	6	9	21	Not appl.	1,3
27	82	Control	M	e3/e3	1953	66	22.10.2019	Not appl.	Not appl.	29	10	52	8	3	20	20	Not appl.	1
28	83	Control	F	e3/e3	1947	72	22.10.2019	Not appl.	Not appl.	29	10	51	9	6	16	23	Not appl.	1,3,5,6
29	89	Control	M	e3/e3	1949	70	15.11.2019	Not appl.	Not appl.	30	10	55	9	7	20	20	Not appl.	1,3,4
30	90	Control	F	e3/e3	1954	65	05.12.2019	Not appl.	Not appl.	29	10	53	8	7	18	20	Not appl.	7
31	93	Control	F	e3/e3	1946	73	16.01.2020	Not appl.	Not appl.	30	10	54	10	10	20	20	Not appl.	1,3
32	98	Control	F	e3/e3	1947	72	2020-02-05	Not appl.	Not appl.	30	10	52	6	6	12	18	Not appl.	1,4
33	101	Control	F	e3/e3	1957	62	12.02.2020	Not appl.	Not appl.	29	10	53	8	8	20	20	Not appl.	1,4
34	104	Control	M	e3/e3	1945	74	26.02.2020	Not appl.	Not appl.	30	10	53	8	8	17	21	Not appl.	1
35	114	Control	F	e3/e4	1965	55	2020-11-10	Not appl.	Not appl.	29	10	54	8	5	20	20	Not appl.	0
36	115	Control	F	e3/e3	1971	49	2020-11-12	Not appl.	Not appl.	30	10	54	9	8	20	20	Not appl.	0
37	124	Control	F	e2/e3	1954	67	2021-04-08	Not appl.	Not appl.	29	10	53	8	7	18	20	Not appl.	1,4,7,10
38	125	Control	F	e2/e3	1945	75	2021-04-19	Not appl.	Not appl.	28	10	54	8	9	18	17	Not appl.	6
39	127	Control	F	e3/e3	1950	70	2021-05-20	Not appl.	Not appl.	30	10	54	8	8	18	19	Not appl.	1
1	2	MCI-nc	F	e3/e3	1947	69	11.07.2016	Not appl.	2014	30	10	54	9	9	18	20	Choline alfoscerate	1	MCI-nc
2	6	MCI-nc	F	e2/e3	1937	79	11.07.2016	Not appl.	2016	25	10	52	8	6	20	20	Choline alfoscerate	0
3	7	MCI-nc	F	e2/e3	1955	61	11.07.2016	Not appl.	2014	30	10	53	9	9	19	20	Choline alfoscerate	0
4	8	MCI-nc	F	e3/e3	1949	67	11.07.2016	Not appl.	2014	30	10	52	9	7	17	20	Choline alfoscerate	1
	8A	MCI-nc	F	e3/e3	1949	69	13.09.2018	Not appl.	2014	27	10	41	7	4	18	18	Choline alfoscerate	1
5	9	MCI-nc	F	e3/e3	1935	81	11.07.2016	Not appl.	2015	29	5	55	8	5	13	26	Choline alfoscerate	1,4,5
6	10	MCI-nc	M	e3/e3	1950	66	13.07.2016	Not appl.	2015	30	10	55	8	8	17	21	Choline alfoscerate	6
7	12	MCI-nc	F	e3/e3	1947	69	13.07.2016	Not appl.	2016	30	10	54	9	10	20	17	Choline alfoscerate	1
8	14	MCI-nc	F	e3/e4	1937	79	13.07.2016	Not appl.	2014	30	10	55	9	6	16	20	Choline alfoscerate	1,3,4
9	18	MCI-nc	M	e3/e3	1940	76	25.07.2016	Not appl.	2016	30	10	55	8	6	21	22	Choline alfoscerate	1,4,6
10	19	MCI-nc	M	e3/e3	1953	63	25.07.2016	Not appl.	2015; died in 2019	30	10	54	7	7	15	15	Choline alfoscerate	1
11	20	MCI-nc	F	e3/e3	1958	58	25.07.2016	Not appl.	2015	30	10	52	9	9	18	20	Choline alfoscerate	0
12	21	MCI-nc	M	e3/e3	1934	82	25.07.2016	Not appl.	2013; died in 2018	29	10	51	8	7	18	20	Choline alfoscerate	1
13	32	MCI-nc	F	e3/e3	1949	68	24.05.2018	Not appl.	2017	26	10	47	7	3	14	18	Escitalopram, Choline alfoscerate	1, 2,3,4,6
14	38	MCI-nc	F	e3/e3	1941	77	30.05.2018	Not appl.	2018	29	9	49	8	6	14	15	Choline alfoscerate	1,2,3,6,7
	38A	MCI-nc	F	e3/e3	1941	78	08.11.2019	Not appl.	2018	29	9	49	8	6	14	15	Choline alfoscerate	1,2,3,6,7
15	44	MCI-nc	F	e3/e3	1948	70	09.07.2018	Not appl.	2018	30	10	50	10	8	18	20	without therapy	2
16	49	MCI-nc	F	e3/e3	1963	55	19.07.2018	Not appl.	2018	30	9	44	7	4	10	14	ascorbic acid, ferrous sulfate	7
17	54	MCI-nc	F	e3/e3	1959	58	25.09.2018	Not appl.	2017	30	10	53	8	8	16	20	without therapy	0
18	87	MCI-nc	F	e3/e3	1937	82	14.11.2019	Not appl.	2018	29	9	51	7	6	15	17	without therapy	1,3,6
19	108	MCI-nc	F	e3/e3	1938	82	2020-10-09	Not appl.	2020	27	8	50	6	6	5	10	Choline alfoscerate, Nicergoline, Agomelatinum	1
20	110	MCI-nc	F	e3/e3	1948	72	2020-10-14	Not appl.	2020	26	10	53	9	9	12	15	Choline alfoscerate, Nicergoline	1
21	111	MCI-nc	F	e3/e3	1954	65	2020-10-15	Not appl.	2020	29	10	53	7	6	13	20	without therapy	1.4
	111A	MCI-nc	F	e3/e3	1954	65	2021-05-21	Not appl.	2020	29	10	50	8	6	15	6	Nicergoline	1,3,4
22	112	MCI-nc	M	e2/e3	1948	71	2020-10-15	Not appl.	2020	26	9	48	7	5	6	8	Zopiclone, Сhlorprothixene, Fluvoxamine, Memantine, Olanzapine	1
23	119	MCI-nc	F	e3/e3	1948	72	2021-02-05	Not appl.		29	8	48	4	2	14	12	Paroxetine	1,4,10
1	1	MCI-c	M	e3/e4	1936	80	11.07.2016	Not appl.	2015; 2019 - AD	30	8	48	5	4	18	18	Choline alfoscerate	4	MCI-c
2	15	MCI-c	F	e3/e3	1943	73	13.07.2016	Not appl.	2015; 2020 - AD	30	10	48	8	5	15	17	Choline alfoscerate	1,3,5
3	36	MCI-c	M	e3/e3	1945	72	30.05.2018	Not appl.	2015; 2020 - AD	26	9	47	3	3	10	14	without therapy	1, 4
	36A	MCI-c	M	e3/e3	1945	74	17.10.2019	Not appl.	2015; 2020 - AD	25	4	31	2	0	3	3	Choline alfoscerate	1,4,8
	36B	MCI-c	M	e3/e3	1945	75	26.11.2020	Not appl.	2015; 2020 - AD	18	9	48	2	0	5	6	Donepezil, Nicergoline, Choline alfoscerate	1,4,8
4	58	MCI-c	F	e3/e4	1951	67	10.10.2018	Not appl.	2018; 2021 - AD	28	9	45	7	7	18	14	Choline alfoscerate, Nicergoline	1,2,3
5	68	MCI-c	M	e3/e3	1936	83	15.10.2019	Not appl.	2019; 2020 - AD	27	9	49	5	3	10	8	without therapy	8
6	84	MCI-c	M	e3/e3	1926	93	23.10.2019	Not appl.	2003; 2020 - AD; died in 2021	18	8	38	4	1	8	6	Choline alfoscerate	4
7	95	MCI-c	F	e3/e3	1945	74	24.01.2020	Not appl.	2018; 2021 - AD	29	10	52	7	8	20	20	Choline alfoscerate	1,3
8	102	MCI-c	M	e2/e3	1937	83	12.02.2020	Not appl.	2015; 2021 - AD	28	9	49	8	6	19	14	without therapy	4.7
9	128	MCI-c	F	e3/e4	1958	63	2021-05-24	Not appl.	2020; 2021 - AD	26	10	48	6	8	11	15	without therapy	1,3,4,5
1	16	AD-pr	M	e4/e4	1946	70	21.07.2016	severe	2012; died in 2019	11	2	8	2	0	3	2	Memantine, Donepezil, Nicergoline	1,2,3	AD-presenile
2	24	AD-pr	M	e3/e3	1952	66	26.01.2018	mild	2015	22	8	48	5	1	11	13	Memantine, Rivastigmine	0
	24A	AD-pr	M	e3/e3	1952	66	03.10.2018	mild	2015	20	6	42	3	0	9	12	Memantine, Rivastigmine	0
3	25	AD-pr	F	e3/e3	1947	70	26.04.2018	moderate	2016 (MCI since 2011I)	13	5	14	2	0	5	8	Donepezil	5
	25A	AD-pr	F	e3/e3	1947	70	22.01.2020	severe	2016 (MCI since 2011I)	3	2	0	0	0	0	0	Memantine, Donepezil	5
4	26	AD-pr	F	e4/e4	1945	72	27.04.2018	moderate	2012	14	5	18	5	2	5	8	Rivastigmine, Memantine	1
5	29	AD-pr	F	e3/e3	1950	67	17.05.2018	severe	2017	8	3	12	0	0	1	1	Memantine, Donepezil	1
6	39	AD-pr	M	e3/e3	1942	75	19.06.2018	moderate	2013	17	7	36	2		10	11	Memantine	1.4
6	39A	AD-pr	M	e3/e3	1942	75	03.10.2018	moderate	2013	17	7	36	2		10	11	Memantine	1.4
7	40	AD-pr	M	e4/e4	1954	63	28.06.2018	mild	2018	24	6	41	4	0	18	20	Rivastigmine	3
	40A	AD-pr	M	e4/e4	1954	66	20.05.2021	severe	2018	8	4	20	1	0	2	4	Donepezil, Vinpocetine	3.8
8	56	AD-pr	F	e4/e4	1947	71	03.10.2018	severe	2016	14	2	15	2	0	2	3	Rivastigmine, Memantine, Quetiapine	1, 3, 6, 7
9	63	AD-pr	M	e3/e3	1962	57	05.09.2019	moderate	2019	15	6	12	2	0	5	7	Memantine, Choline alfoscerate	3,4,7
	63A	AD-pr	M	e3/e3	1962	59	2021-02-03	moderate	2019	11	1	2	0	0	0	0	Memantine, Choline alfoscerate	3,4,7
10	65	AD-pr	F	e3/e4	1951	68	10.09.2019	mild	2019	22		31	7	1	10	16	without therapy	1,5
11	70	AD-pr	M	e3/e3	1956	63	17.10.2019	severe	2019	2	0	0	0	0	0		Memantine	1,3
12	88	AD-pr	F	e3/e4	1954	65	15.11.2019	moderate	2019	19	6	35	3	0	8	6	Rivastigmine	1,5
13	120	AD-pr	F	e3/e3	1960	61	2021-02-12	mild	2020	27	10	53	Nm	Nm	7	8	Escitalopram, Memantine, Choline alfoscerate, Quetiapine	1.5
1	22	AD-sen	M	e3/e3	1940	77	19.01.2018	moderate	2016	19	6	39	4	0	5	8	Donepezil, Citicoline,	1, 4, 5	AD-senile
2	27	AD-sen	M	e3/e3	1936	81	28.04.2018	moderate	2018	14	3	12	2	0	1	4	Memantine	1,3,4
	27A	AD-sen	M	e3/e3	1936	81	29.05.2018	moderate	2018	17	3	12	2	0	1	4	Memantine, Mirtazapine, Quetiapine, Carbamazepine, Choline alfoscerate	1,3,4
3	31	AD-sen	F	e3/e3	1930	87	24.05.2018	mild	2018	23	6	50	7	3	12	11	Memantine, Haloperidol	1, 4, 6
4	35	AD-sen	M	e4/e4	1933	84	30.05.2018	moderate	2018	16	7	0	0	0	0	0	Haloperidol, Carbamazepine, Quetiapine	1, 4
	35A	AD-sen	M	e4/e4	1933	86	10.07.2019	moderate	2018	16	0	0	6	0	0	0	Memantine, Mirtazapine, Quetiapine, Haloperidol, Choline alfoscerate	1, 4
5	42	AD-sen	F	e3/e3	1938	79	02.07.2018	mild	2017	23	8	28	4	2	15	19	Memantine	1, 3, 4, 5, 7
	42A	AD-sen	F	e3/e3	1938	80	17.07.2019	moderate	2017	11	3	30	1	0	6	5	Memantine, Citicoline	1, 3, 4, 5, 7
6	53	AD-sen	M	e4/e4	1947	70	14.09.2018	mild	2016	21	8	44	6	4	10	12	Donepezil	1, 5, 7
	53A	AD-sen	M	e4/e4	1947	72	25.10.2019	mild	2016	20	9	44	2	0	10	8	Donepezil, Memantine, Citicoline	1, 5, 7
	53B	AD-sen, VD	M	e4/e4	1947	73	2021-04-09	severe	2016	10	3	30	2	0	4	3	Memantine, Donepezil, Citicoline, Chlorprothixen	1, 5, 7, 10
7	57	AD-sen	F	e3/e4	1945	72	08.10.2018	mild	2017	21	5	32	2	2	6	4	Memantine,Donepezil	1.3
8	60	AD-sen	M	e2/e4	1938	80	10.07.2019	mild	2019	20	9	38	5	3	12	10	Choline alfoscerate, Duloxetinum, Mirtazapine, Risperidone	1, 2, 4
9	61	AD-sen	F	e3/e3	1945	73	10.07.2019	severe	2014	10	2	3	0	0	2	5	Choline alfoscerate, Mirtazapine, Memantine, паксил	4, 1, 5, 6
10	66	AD-sen	F	e3/e3	1939	80	15.10.2019	mild	2018	24	8	43	6	3	11	11	Memantine, Olanzapinum, Pipofezinum	1,3,6
11	84A	AD-sen	M	e3/e3	1926	94	2020-10-02	moderate	2020 (MCI since 2003) died in 2021	16	7	4	3	0	2	1	Memantine, Choline alfoscerate, Risperidone	4
12	85	AD-sen	M	e3/e3	1948	71	23.10.2019		2018	8	0	0	1	1	0	0	Memantine, Choline alfoscerate	1
13	86	AD-sen	F	e3/e4	1944	75	25.10.2019	mild	2016	19	8	46	2	2	6	8	Nicergoline, Donepezil	3
14	96	AD-sen	F	e3/e4	1938	81	24.01.2020	severe	2016	13	3	22	1	0	1	1	Memantine, Donepezil	1,2,5,8
15	97	AD-sen	F	e4/e4	1948	71	28.01.2020		2019	20	9	49	6	2	10	13	Donepezil	1
16	99	AD-sen	M	e4/e4	1948	71	2020-02-05	mild	2019	22	3	42	2	2	8	5	Memantine, Rivastigmine	1,2
17	100	AD-sen, VD	F	e3/e4	1948	71	12.02.2020	moderate	2018	17	7	42	7	7	6	8	Rivastigmine, Choline alfoscerate	1,4
18	106	AD-sen	M	e2/e3	1940	80	2020-10-02	moderate	2019	19	8	48	7	7	10	12	Memantine, Fluvoxamine	1
19	107	AD-sen	M	e3/e3	1939	81	2020-10-09	moderate	2019	11	4	18	2	0	5	4	Memantine, Rivastigmine
20	116	AD-sen, VD	F	e3/e3	1944	76	2020-11-12	mild	2019	21	5	43	5	0	12	11	Memantine, Rivastigmine	1
21	118	AD-sen, VD	F	e3/e3	1939	81	2021-01-28	moderate	2018	13	3	5	2	0	3	2	Amantadine, Duloxetinum, Mirtazapine, Memantine, Olanzapinum, Zopiclone	1,3,4,8
22	121	AD-sen	F	e2/e3	1953	67	2021-03-31	moderate	2021	12	5	25	2	0	10	8	Quetiapine, Rivastigmine, Cerebrolysin, Choline alfoscerate	1.3
23	123	AD-sen, VD	F	e3/e4	1937	84	2021-04-07	mild	2020	29	9	49	5	4	15	19	Rivastigmine, Nicergoline	1
24	126	AD-sen	M	e3/e3	1940	80	2021-05-20	mod.-sev.	2020	13	6	30	3	0	6	5	Memantine, Nicergoline	1.8
1	30	VD	F	e3/e4	1932	85	21.05.2018	moderate	2018	19	7	32	5	3	14	17	Memantine	1,3,5	VD
2	34	VD	M	e3/e3	1961	57	29.05.2018	moderate	2017	19	9	44	3	2	10	13	Memantine	1, 2, 3, 4, 5, 6,
3	51	VD	F	e2/e3	1942	76	13.09.2018	moderate	2016	20	8	43	5	5	10	14	without therapy	1.2
4	52	VD	M	e3/e4	1936	82	13.09.2018	mild	2014 (MCI since 2005)	20	7	31	4	5	10	16	Memantine	1, 4
5	62	VD	F	e3/e4	1947	72	04.09.2019	moderate	2016	27	10	46	8	4	17	10	Donepezil	1,3
5	62A	VD	F	e3/e4	1947	72	23.10.2019	moderate	2016	27	10	46	8	4	17	10	Donepezil	1,3
5	62B	VD	F	e3/e4	1947	73	2020-10-02	severe	2016	26	10	40	5	0	10	14	Memantine	1,3
6	91	VD	F	e3/e3	1947	72	16.01.2020	moderate	2015	18	5	26	4	2	10	8	without therapy	1,3,4,5,7
1	103	FD	F	e3/e3	1947	72	26.02.2020	mild	2019	23	8	51	5	5	9	8	Memantine, Nicergoline	1,2	FD
2	47	FD-1	F	e2/e3	1950	68	19.07.2018	mod.-sev.	2016	7	2	2	0	0	0	0	Memantine, Quetiapine, Donepezil	1, 3, 7	FD-1 - behavioral variant
2	47A	FD-1	F	e2/e3	1950	69	23.10.2019	mod.-sev.	2016	0	0	0	0	0	0	0	Donepezil, Memantine, Quetiapine	1, 3, 7	FD-2 - semantic variant
3	55	FD-1	M	e3/e3	1941	77	26.09.2018	mild	2018	20	8	31	6	3	10	8	Zopiclone, Memantine, Carbamazepine, Haloperidol, Quetiapine	0	FD-3 - mixed variant
4	105	FD-1	F	e2/e3	1952	67	2020-09-24	mild	2019	5	4	0	0	0	0	0	Memantine, Nicergoline, Quetiapine	1,3,6
5	113	FD-1	F	e3/e4	1990	30	2020-11-10	mod.-sev.	2020	14	4	10	3	0	0	0	Haloperidol, Piracetam	0
6	117	FD-1	F	e2/e3	1957	63	2021-01-28	mild	2021	26	9	47	3	0	2	3	Sertraline, Memantine	1
7	122	FD-1	F	e2/e3	1964	57	2021-04-07	mild	2021	27	10	49	8	9	10	12	Orlistat, Memantine	8
8	33	FD-2	F	e2/e3	1950	67	24.05.2018	mild	2017	23	10	20	3	0	4	5	Donepezil, Nicergoline	1, 3, 5, 7
8	33A	FD-2	F	e2/e3	1950	67	14.09.2018	moderate	2017	23	10	20	6	6	10	11	Donepezil, Nicergoline	1, 3, 5, 7
8	33B	FD-2	F	e2/e3	1950	69	26.02.2020	moderate	2017	18	8	4	3	0	2	4	L-Thyroxin	1, 3, 5, 7
8	33C	FD-2	F	e2/e3	1950	70	28.04.2021	mod.-sev.	2017	9	0	0	2	0	0	0	Memantine, Melatonin	1, 3, 5, 7
9	46	FD-3	M	e3/e3	1969	49	18.07.2018	mod.-sev.	2017	2	0	2	0	0	0	0	Memantine, Citalopram, Quetiapine	0
10	59	FD-3	M	e3/e3	1954	65	10.07.2019	mild	2019	26	10	45	8	6	2	3	Memantine	1, 3
11	92	FD-3	M	e3/e4	1943	76	16.01.2020	severe	2017	8	2	0	0	0	0	0	Memantine, Pimavanserin	1,4,8
