# Supplementary material for: Prognosis of Alzheimer’s Disease Using Quantitative Mass Spectrometry of Human Blood Plasma Proteins and Machine Learning
Source: Int J Mol Sci. 2022 Jul 18;23(14):7907. doi: 10.3390/ijms23147907 (PMC9318764; doi:10.3390/ijms23147907)
Supplement: Supplementary file 1 [file ijms-23-07907-s001.zip › Supplementary_Table-S7.xlsx]

## Sheet: Sheet1
Table S7. Transition list for MRM experiments (Q1/Q3, RT-retention time, CE - collision enenrgy).
ID	Protein	Peptide	Fragment	NAT (light)/SIS (heavy)	Q1 Mass (Da)	Q2 Mass (Da)	RT (min)	CE (V)
P14151	L-selectin	AEIEYLEK	y6	heavy	501.766	802.444	14.3	19
P14151	L-selectin	AEIEYLEK	y6	light	497.76	794.43	14.3	19
O95445	Apolipoprotein M	AFLLTPR	y5	heavy	414.255	609.396	22.9	19
O95445	Apolipoprotein M	AFLLTPR	y5	light	409.251	599.396	22.9	19
P06396	Gelsolin	AGALNSNDAFVLK	b3	heavy	664.359	200.103	24.5	35
P06396	Gelsolin	AGALNSNDAFVLK	b3	light	660.359	200.103	24.5	35
P22301	Interleukin-10	AHVNSLGENLK	y5	heavy	397.219	568.318	8.5	17
P22301	Interleukin-10	AHVNSLGENLK	y5	light	394.55	560.3	8.5	17
P49913	Cathelicidin antimicrobial peptide	AIDGINQR	y6	heavy	448.745	712.362	6	22
P49913	Cathelicidin antimicrobial peptide	AIDGINQR	y6	light	443.745	702.362	6	22
P01023	Alpha-2-macroglobulin	AIGYLNTGYQR	y7	heavy	633.33	861.445	17	31
P01023	Alpha-2-macroglobulin	AIGYLNTGYQR	y7	light	628.33	851.445	17	31
P01034	Cystatin-C	ALDFAVGEYNK	y6	heavy	617.814	717.366	23.7	27
P01034	Cystatin-C	ALDFAVGEYNK	y6	light	613.814	709.366	23.7	27
Q96KN2	Beta-Ala-His dipeptidase	ALEQDLPVNIK	y5	heavy	624.36	578.38	25.8	27
Q96KN2	Beta-Ala-His dipeptidase	ALEQDLPVNIK	y5	light	620.36	570.38	25.8	27
P02647	Apolipoprotein A-I	ATEHLSTLSEK	y10++	heavy	408.551	576.803	6.7	21
P02647	Apolipoprotein A-I	ATEHLSTLSEK	y10++	light	405.88	572.8	6.7	21
P02749	Beta-2-glycoprotein 1	ATVVYQGER	y6	heavy	516.772	761.382	5.9	27
P02749	Beta-2-glycoprotein 1	ATVVYQGER	y6	light	511.772	751.382	5.9	27
P55058	Phospholipid transfer protein	AVEPQLQEEER	y8++	heavy	669.333	519.758	9.7	32
P55058	Phospholipid transfer protein	AVEPQLQEEER	y8++	heavy	669.333	1038.51	9.7	32
P55058	Phospholipid transfer protein	AVEPQLQEEER	y8++	light	664.333	514.758	9.7	35
P55058	Phospholipid transfer protein	AVEPQLQEEER	y8++	light	664.333	1028.51	9.7	35
P05543	Thyroxine-binding globulin	AVLHIGEK	y6++	heavy	292.18	352.713	9.4	15
P05543	Thyroxine-binding globulin	AVLHIGEK	y6++	heavy	292.18	402.247	9.4	15
P05543	Thyroxine-binding globulin	AVLHIGEK	y6++	light	289.513	348.713	9.4	15
P05543	Thyroxine-binding globulin	AVLHIGEK	y6++	light	289.513	398.247	9.4	15
PEP9999032429	Plasma serine protease inhibi	AVVEVDESGTR	y9++	heavy	586.296	501.243	8	23
PEP9999032429	Plasma serine protease inhibi	AVVEVDESGTR	y9++	heavy	586.296	773.367	8	23
PEP9999032429	Plasma serine protease inhibi	AVVEVDESGTR	y9++	light	581.296	496.243	8	31
PEP9999032429	Plasma serine protease inhibi	AVVEVDESGTR	y9++	light	581.296	763.367	8	31
P61626	Lysozyme C	AWVAWR	y4	heavy	399.718	541.312	21.7	19
P61626	Lysozyme C	AWVAWR	y4	light	394.714	531.303	21.7	19
P43652	Afamin	DADPDTFFAK	y7	heavy	567.764	833.428	20.6	27
P43652	Afamin	DADPDTFFAK	y7	light	563.764	825.428	20.6	27
P01008	Antithrombin-III	DDLYVSDAFHK	y8++	heavy	439.879	487.745	19.4	19
P01008	Antithrombin-III	DDLYVSDAFHK	y8++	light	437.21	483.74	19.4	19
P02787	Serotransferrin	DGAGDVAFVK	y7	heavy	493.756	743.418	14.1	23
P02787	Serotransferrin	DGAGDVAFVK	y7	light	489.756	735.418	14.1	23
P00738	Haptoglobin	DIAPTLTLYVGK	y9++	heavy	649.877	500.302	33.4	24
P00738	Haptoglobin	DIAPTLTLYVGK	y9++	light	645.877	496.302	33.4	24
P02750	Leucine-rich alpha-2-glycoprotein	DLLLPQPDLR	y6	heavy	595.345	735.402	32.3	24
P02750	Leucine-rich alpha-2-glycoprotein	DLLLPQPDLR	y6	light	590.345	725.402	32.3	24
P06702	Protein S100-A9	DLQNFLK	y5	heavy	443.25	657.38	24	19
P06702	Protein S100-A9	DLQNFLK	y5	light	439.25	649.38	24	14
P00751	Complement factor B	EELLPAQDIK	y6	heavy	582.324	679.387	20.7	23
P00751	Complement factor B	EELLPAQDIK	y6	light	578.324	671.387	20.7	23
P01011	Alpha-1-antichymotrypsin	EIGELYLPK	y2	heavy	535.305	252.18	26.1	24
P01011	Alpha-1-antichymotrypsin	EIGELYLPK	y2	light	531.305	244.18	26.1	24
P25311	Zinc-alpha-2-glycoprotein	EIPAWVPFDPAAQITK	y10	heavy	895.983	1095.59	44.6	40
P25311	Zinc-alpha-2-glycoprotein	EIPAWVPFDPAAQITK	y10	light	891.983	1087.59	44.6	40
P10909	Clusterin	ELDESLQVAER	y3	heavy	649.827	385.207	16.2	27
P10909	Clusterin	ELDESLQVAER	y3	light	644.823	375.207	16.2	27
P00734	Prothrombin	ELLESYIDGR	y6	heavy	602.808	720.355	24.8	26
P00734	Prothrombin	ELLESYIDGR	y6	light	597.808	710.355	24.8	26
P55056	Apolipoprotein C-IV	ELLETVVNR	y4	heavy	541.808	497.308	20.4	22
P55056	Apolipoprotein C-IV	ELLETVVNR	y4	heavy	541.808	598.355	20.4	22
P55056	Apolipoprotein C-IV	ELLETVVNR	y4	heavy	541.808	727.398	20.4	27
P55056	Apolipoprotein C-IV	ELLETVVNR	y4	light	536.808	487.308	20.4	27
P55056	Apolipoprotein C-IV	ELLETVVNR	y4	light	536.808	588.355	20.4	27
P55056	Apolipoprotein C-IV	ELLETVVNR	y4	light	536.808	717.398	20.4	27
PEP20130306029	Apolipoprotein A-II	EQLTPLIK	y4	heavy	475.295	478.348	20.9	19
PEP20130306029	Apolipoprotein A-II	EQLTPLIK	y4	light	471.295	470.348	20.9	19
P00748	Coagulation factor XII	EQPPSLTR	y6++	heavy	469.253	340.702	7.1	22
P00748	Coagulation factor XII	EQPPSLTR	y6++	light	464.248	335.697	7.1	22
PEP20121106020	Vasorin	ESHVTLASPEETR	y5	heavy	489.244	641.313	9.3	19
PEP20121106020	Vasorin	ESHVTLASPEETR	y5	light	485.907	631.304	9.3	19
PEP9999032685	Fibrinogen alpha chain	ESSSHHPGIAEFPSR	y4	heavy	549.93	516.281	11.8	31
PEP9999032685	Fibrinogen alpha chain	ESSSHHPGIAEFPSR	y4	light	546.597	506.281	11.8	31
Q9UK55	Protein Z-dependent protease inhibitor	ETSNFGFSLLR	y6	heavy	640.83	702.418	35.2	27
Q9UK55	Protein Z-dependent protease inhibitor	ETSNFGFSLLR	y6	light	635.83	692.418	35.2	27
P02654	Apolipoprotein C-I	EWFSETFQK	y7	heavy	605.288	894.445	25.8	29
P02654	Apolipoprotein C-I	EWFSETFQK	y7	light	601.28	886.43	25.8	29
P16035	Metalloproteinase inhibitor 2	EYLIAGK	y3	heavy	401.234	283.186	11.2	19
P16035	Metalloproteinase inhibitor 2	EYLIAGK	y3	heavy	401.234	396.27	11.2	19
P16035	Metalloproteinase inhibitor 2	EYLIAGK	y3	light	397.23	275.17	11.2	19
P16035	Metalloproteinase inhibitor 2	EYLIAGK	y3	light	397.23	388.25	11.2	19
P04004	Vitronectin	FEDGVLDPDYPR	y5	heavy	716.83	657.335	23.7	38
P04004	Vitronectin	FEDGVLDPDYPR	y5	light	711.841	647.335	23.7	38
P80108	Phosphatidylinositol-glycan-specific phospholipase D	FGSSLITVR	y4	heavy	495.287	498.327	22.8	23
P80108	Phosphatidylinositol-glycan-specific phospholipase D	FGSSLITVR	y4	light	490.282	488.319	22.8	23
PEP2014051635	Pigment epithelium-derived fa	FNAVLTNPQGDYDTSTGK	y11++	heavy	645.978	588.767	20.8	24
PEP2014051635	Pigment epithelium-derived fa	FNAVLTNPQGDYDTSTGK	y11++	light	643.311	584.767	20.8	24
P04114	Apolipoprotein B-100	FPEVDVLTK	y8++	heavy	528.297	454.763	27.2	28
P04114	Apolipoprotein B-100	FPEVDVLTK	y8++	light	524.29	450.763	27.2	28
P05155	Plasma protease C1 inhibitor	FQPTLLTLPR	y8	heavy	598.358	920.581	35.2	22
P05155	Plasma protease C1 inhibitor	FQPTLLTLPR	y8	light	593.358	910.581	35.2	22
P02765	Alpha-2-HS-glycoprotein	FSVVYAK	y5	heavy	411.237	587.364	14.7	19
P02765	Alpha-2-HS-glycoprotein	FSVVYAK	y5	light	407.229	579.349	14.7	19
P24821	Tenascin	FTTDLDSPR	y7	heavy	531.261	813.398	12.5	22
P24821	Tenascin	FTTDLDSPR	y7	light	526.261	803.398	12.5	22
P10646-1	Tissue factor pathway inhibitor (isoform 1)	FYYNSVIGK	y7	heavy	549.79	788.439	20.6	24
P10646-1	Tissue factor pathway inhibitor (isoform 1)	FYYNSVIGK	y7	light	545.79	780.439	20.6	24
P01871	Ig mu chain C region	GFPSVLR	y5++	heavy	393.231	291.186	21.6	17
P01871	Ig mu chain C region	GFPSVLR	y5++	light	388.227	286.181	21.6	17
P02786	Transferrin receptor protein 1	GFVEPDHYVVVGAQR	y13++	heavy	561.623	739.885	23.4	23
P02786	Transferrin receptor protein 1	GFVEPDHYVVVGAQR	y13++	light	558.29	734.88	23.4	23
P05019	Insulin-like growth factor I	GFYFNKPTGYGSSSR	y13++	heavy	559.935	737.354	18.3	23
P05019	Insulin-like growth factor I	GFYFNKPTGYGSSSR	y13++	light	556.602	732.354	18.3	23
P11717	Cation-independent mannose-6-phosphate receptor	GHQAFDVGQPR	y4	heavy	407.872	467.26	8.9	18
P11717	Cation-independent mannose-6-phosphate receptor	GHQAFDVGQPR	y4	heavy	407.872	656.279	8.9	18
P11717	Cation-independent mannose-6-phosphate receptor	GHQAFDVGQPR	y4	light	404.535	457.25	8.9	18
P11717	Cation-independent mannose-6-phosphate receptor	GHQAFDVGQPR	y4	light	404.535	656.279	8.9	18
P32119	Peroxiredoxin-2	GLFIIDGK	y6	heavy	435.76	700.41	28.2	14
P32119	Peroxiredoxin-2	GLFIIDGK	y6	light	431.76	692.41	28.2	14
P22891	Vitamin K-dependent protein Z	GLLSGWAR	y5	heavy	435.248	586.297	25.3	19
P22891	Vitamin K-dependent protein Z	GLLSGWAR	y5	light	430.243	576.29	25.3	19
P00736	Complement C1r subcomponent	GLTLHLK	y5++	heavy	263.841	310.205	16.1	12
P00736	Complement C1r subcomponent	GLTLHLK	y5++	light	261.175	306.205	16.1	12
P02766	Transthyretin	GSPAINVAVHVFR	y11++	heavy	459.59	616.86	28.6	18
P02766	Transthyretin	GSPAINVAVHVFR	y11++	light	456.26	611.86	28.6	18
P07996	Thrombospondin-1	GTLLALER	y4	heavy	441.768	498.292	21.2	25
P07996	Thrombospondin-1	GTLLALER	y4	light	436.768	488.292	21.2	25
P02656	Apolipoprotein C-III	GWVTDGFSSLK	b2	heavy	602.809	244.108	29.5	27
P02656	Apolipoprotein C-III	GWVTDGFSSLK	b2	light	598.809	244.108	29.5	27
P06681	Complement C2	HAFILQDTK	b4	heavy	360.87	469.26	13.6	15
P06681	Complement C2	HAFILQDTK	b4	light	358.2	469.26	13.6	15
P02760	Protein AMBP	HHGPTITAK	y2	heavy	323.851	226.164	3.2	23
P02760	Protein AMBP	HHGPTITAK	y2	heavy	323.851	275.125	3.2	23
P02760	Protein AMBP	HHGPTITAK	y2	heavy	323.851	327.212	3.2	23
P02760	Protein AMBP	HHGPTITAK	y2	light	321.18	218.15	3.2	23
P02760	Protein AMBP	HHGPTITAK	y2	light	321.18	275.125	3.2	19
P02760	Protein AMBP	HHGPTITAK	y2	light	321.18	319.2	3.2	19
P02675	Fibrinogen beta chain	HQLYIDETVNSNIPTNLR	b13++	heavy	713.036	764.376	27.9	19
P02675	Fibrinogen beta chain	HQLYIDETVNSNIPTNLR	b13++	light	709.703	764.376	27.9	19
P02751	Fibronectin	HTSVQTTSSGSGPFTDVR	y6	heavy	625.303	744.392	13.8	23
P02751	Fibronectin	HTSVQTTSSGSGPFTDVR	y6	light	621.969	734.392	13.8	23
P02746	Complement C1q subcomponent subunit B	IAFSATR	y5	heavy	388.221	591.313	9.8	19
P02746	Complement C1q subcomponent subunit B	IAFSATR	y5	light	383.221	581.313	9.8	19
Q96IY4	Carboxypeptidase B2	IAWHVIR	y4++	heavy	302.185	267.673	18.4	19
Q96IY4	Carboxypeptidase B2	IAWHVIR	y4++	heavy	302.185	534.339	18.4	19
Q96IY4	Carboxypeptidase B2	IAWHVIR	y4++	light	298.852	262.673	18.4	19
Q96IY4	Carboxypeptidase B2	IAWHVIR	y4++	light	298.852	524.339	18.4	19
P27169	Serum paraoxonase/arylesterase	IFFYDSENPPASEVLR	y8	heavy	947.467	878.497	35.8	46
P27169	Serum paraoxonase/arylesterase	IFFYDSENPPASEVLR	y8	light	942.46	868.49	35.8	46
Q15848	Adiponectin	IFYNQQNHYDGSTGK	y13++	heavy	593.939	760.34	9.3	23
Q15848	Adiponectin	IFYNQQNHYDGSTGK	y13++	heavy	593.939	833.874	9.3	23
Q15848	Adiponectin	IFYNQQNHYDGSTGK	y13++	light	591.28	756.34	9.3	27
Q15848	Adiponectin	IFYNQQNHYDGSTGK	y13++	light	591.28	829.874	9.3	27
P22105	Tenascin-X	ILISGLEPSTPYR	b2	heavy	728.408	227.176	29.9	36
P22105	Tenascin-X	ILISGLEPSTPYR	b2	light	723.408	227.176	29.9	36
P55290	Cadherin-13	INENTGSVSVTR	b2	heavy	643.833	228.134	7.7	31
P55290	Cadherin-13	INENTGSVSVTR	b2	light	638.83	228.134	7.7	31
Q15166	Paraoxonase(PON3)	IQNVLSEKPR	y8++	heavy	398.568	476.777	10.4	19
Q15166	Paraoxonase(PON3)	IQNVLSEKPR	y8++	light	395.235	471.777	10.4	19
P20742	Pregnancy zone protein	ISEITNIVSK	y6	heavy	556.327	669.403	19.8	27
P20742	Pregnancy zone protein	ISEITNIVSK	y6	heavy	556.327	782.487	19.8	27
P20742	Pregnancy zone protein	ISEITNIVSK	y6	light	552.327	661.403	19.8	27
P20742	Pregnancy zone protein	ISEITNIVSK	y6	light	552.327	774.487	19.8	27
P18428	Lipopolysaccharide-binding protein	ITLPDFTGDLR	y8	heavy	629.336	930.447	36.3	27
P18428	Lipopolysaccharide-binding protein	ITLPDFTGDLR	y8	light	624.336	920.447	36.3	27
P11021	78 kDa glucose-regulated protein	ITPSYVAFTPEGER	y12++	heavy	788.898	681.832	25.2	32
P11021	78 kDa glucose-regulated protein	ITPSYVAFTPEGER	y12++	light	783.89	676.83	25.2	32
P00450	Ceruloplasmin	IYHSHIDAPK	y8++	heavy	396.88	456.743	5.5	19
P00450	Ceruloplasmin	IYHSHIDAPK	y8++	light	394.21	452.74	5.5	19
P35443	Thrombospondin-4	KPQDFLEELK	y4	heavy	418.899	526.296	25.8	20
P35443	Thrombospondin-4	KPQDFLEELK	y4	light	416.233	518.296	25.8	20
P09486	SPARC	LEAGDHPVELLAR	y11++	heavy	477.261	594.325	21.2	21
P09486	SPARC	LEAGDHPVELLAR	y11++	light	473.928	589.325	21.2	21
P04217	Alpha-1B-glycoprotein	LETPDFQLFK	b2	heavy	623.334	243.134	36.7	31
P04217	Alpha-1B-glycoprotein	LETPDFQLFK	b2	light	619.334	243.134	36.7	31
PEP2014090309	Plasminogen	LFLEPTR	b2	heavy	443.258	261.16	19.6	19
PEP2014090309	Plasminogen	LFLEPTR	b2	light	438.254	261.16	19.6	19
P06727	Apolipoprotein A-IV	LGEVNTYAGDLQK	b3	heavy	708.367	300.155	17.1	35
P06727	Apolipoprotein A-IV	LGEVNTYAGDLQK	b3	light	704.36	300.155	17.1	35
P08697	Alpha-2-antiplasmin	LGNQEPGGQTALK	b5	heavy	660.846	542.258	7.6	32
P08697	Alpha-2-antiplasmin	LGNQEPGGQTALK	b5	heavy	660.846	779.457	7.6	32
P08697	Alpha-2-antiplasmin	LGNQEPGGQTALK	b5	light	656.857	542.258	7.6	35
P08697	Alpha-2-antiplasmin	LGNQEPGGQTALK	b5	light	656.857	771.457	7.6	35
P02649	Apolipoprotein E	LGPLVEQGR	y7++	heavy	489.74	404.732	12.8	23
P02649	Apolipoprotein E	LGPLVEQGR	y7++	light	484.78	399.732	12.8	23
P00451	Coagulation factor VIII	LHPTHYSIR	y7++	heavy	378.542	442.237	6.4	18
P00451	Coagulation factor VIII	LHPTHYSIR	y7++	light	375.21	437.23	6.4	18
PEP20120919025	Complement component C7	LIDQYGTHYLQSGSLGGEYR	b2	heavy	756.371	227.175	25.6	35
PEP20120919025	Complement component C7	LIDQYGTHYLQSGSLGGEYR	b2	light	753.038	227.175	25.6	35
Q9HDC9	Adipocyte plasma membrane-associated protein	LLEYDTVTR	y7	heavy	560.3	893.424	16.1	23
Q9HDC9	Adipocyte plasma membrane-associated protein	LLEYDTVTR	y7	light	555.295	883.42	16.1	23
P05362	Intercellular adhesion molecule 1	LLGIETPLPK	y8	heavy	544.844	862.513	32	26
P05362	Intercellular adhesion molecule 1	LLGIETPLPK	y8	light	540.844	854.513	32	26
P36955	Pigment epithelium-derived factor	LQSLFDSPDFSK	y10	heavy	696.351	1150.55	29.9	32
P36955	Pigment epithelium-derived factor	LQSLFDSPDFSK	y10	light	692.351	1142.55	29.9	32
PEP2013073114	Alpha-1-antitrypsin	LSITGTYDLK	y7	heavy	559.813	805.419	23.1	27
PEP2013073114	Alpha-1-antitrypsin	LSITGTYDLK	y7	light	555.813	797.419	23.1	27
P02748	Complement component C9	LSPIYNLVPVK	y9++	heavy	625.884	525.826	35.9	27
P02748	Complement component C9	LSPIYNLVPVK	y9++	light	621.884	521.826	35.9	27
O43866	CD5 antigen-like	LVGGLHR	y5	heavy	381.237	549.313	5.6	23
O43866	CD5 antigen-like	LVGGLHR	y5	light	376.237	539.313	5.6	23
P02768	Serum albumin	LVNEVTEFAK	y2	heavy	579.319	226.164	20.4	47
P02768	Serum albumin	LVNEVTEFAK	y2	light	575.319	218.164	20.4	47
P24158	Myeloblastin	LVNVVLGAHNVR	y10++	heavy	434.263	544.814	19.9	15
P24158	Myeloblastin	LVNVVLGAHNVR	y10++	light	430.93	539.814	19.9	15
Q9UGM5	Fetuin-B	LVVLPFPK	y6	heavy	460.807	708.453	35	19
Q9UGM5	Fetuin-B	LVVLPFPK	y6	light	456.807	700.453	35	19
P02790	Hemopexin	NFPSPVDAAFR	y9++	heavy	615.811	485.255	28.4	23
P02790	Hemopexin	NFPSPVDAAFR	y9++	light	610.811	480.255	28.4	23
P19320	Vascular cell adhesion protein 1	NTVISVNPSTK	y8	heavy	584.327	853.487	12.5	27
P19320	Vascular cell adhesion protein 1	NTVISVNPSTK	y8	light	580.32	845.47	12.5	27
P02763	Alpha-1-acid glycoprotein 1	NWGLSVYADKPETTK	y13++	heavy	572.962	708.877	23.1	23
P02763	Alpha-1-acid glycoprotein 1	NWGLSVYADKPETTK	y13++	light	570.295	704.877	23.1	23
P22352	Glutathione peroxidase 3	QEPGENSEILPTLK	y12++	heavy	781.912	653.361	25	35
P22352	Glutathione peroxidase 3	QEPGENSEILPTLK	y12++	light	777.912	649.361	25	35
P00740	Coagulation factor IX	SALVLQYLR	y5	heavy	536.824	702.417	31.8	27
P00740	Coagulation factor IX	SALVLQYLR	y5	light	531.82	692.417	31.8	27
Q08380	Galectin-3-binding protein	SDLAVPSELALLK	y8	heavy	682.4	878.544	38.4	28
Q08380	Galectin-3-binding protein	SDLAVPSELALLK	y8	light	678.4	870.544	38.4	28
PEP2013021902	Coagulation factor V	SEAYNTFSER	y8	heavy	607.272	997.462	9	27
PEP2013021902	Coagulation factor V	SEAYNTFSER	y8	light	602.272	987.462	9	27
PEP20130215010	Vitamin K-dependent protein S	SFQTGLFTAAR	y8	heavy	604.819	846.471	25.8	26
PEP20130215010	Vitamin K-dependent protein S	SFQTGLFTAAR	y8	light	599.819	836.471	25.8	26
P43251	Biotinidase	SHLIIAQVAK	b4	heavy	363.229	451.266	16.5	18
P43251	Biotinidase	SHLIIAQVAK	b4	heavy	363.229	338.182	16.5	18
P43251	Biotinidase	SHLIIAQVAK	b4	light	360.557	451.266	16.5	18
P43251	Biotinidase	SHLIIAQVAK	b4	light	360.557	338.182	16.5	18
P19823	Inter-alpha-trypsin inhibitor heavy chain H2	SLAPTAAAK	y6	heavy	419.25	566.34	5.7	19
P19823	Inter-alpha-trypsin inhibitor heavy chain H2	SLAPTAAAK	y6	light	415.25	558.34	5.7	19
P13645	Keratin type I cytoskeletal 10	SLLEGEGSSGGGGR	b2	heavy	636.807	201.123	8	35
P13645	Keratin type I cytoskeletal 10	SLLEGEGSSGGGGR	b2	light	631.802	201.124	8	35
P26927	Hepatocyte growth factor-like protein	SPLNDFQVLR	y7	heavy	599.827	901.477	29.9	32
P26927	Hepatocyte growth factor-like protein	SPLNDFQVLR	y7	light	594.827	891.477	29.9	32
P08603	Complement factor H	SSQESYAHGTK	y9++	heavy	401.523	514.748	2.3	15
P08603	Complement factor H	SSQESYAHGTK	y9++	light	398.856	510.748	2.3	15
O75882	Attractin	SVNNVVVR	y6	heavy	448.764	710.418	7.2	23
O75882	Attractin	SVNNVVVR	y6	light	443.759	700.409	7.2	23
PEP2013020903	Coagulation factor X	TGIVSGFGR	y5	heavy	452.25	533.271	15.9	23
PEP2013020903	Coagulation factor X	TGIVSGFGR	y5	light	447.25	523.271	15.9	23
P01024	Complement C3	TGLQEVEVK	y6	heavy	505.785	739.408	12.4	27
P01024	Complement C3	TGLQEVEVK	y6	light	501.785	731.408	12.4	27
P48740	Mannan-binding lectin serine protease 1	TGVITSPDFPNPYPK	b3	heavy	820.924	258.145	28.7	40
P48740	Mannan-binding lectin serine protease 1	TGVITSPDFPNPYPK	b3	light	816.917	258.145	28.7	40
P23142	Fibulin-1	TGYYFDGISR	y6	heavy	594.782	704.36	21	27
P23142	Fibulin-1	TGYYFDGISR	y6	light	589.782	694.36	21	27
Q9UNN8	Endothelial protein C receptor	TLAFPLTIR	y7	heavy	521.321	827.502	37	23
Q9UNN8	Endothelial protein C receptor	TLAFPLTIR	y7	light	516.321	817.502	37	23
P05546	Heparin cofactor 2	TLEAQLTPR	y7	heavy	519.795	824.451	14.6	27
P05546	Heparin cofactor 2	TLEAQLTPR	y7	light	514.795	814.451	14.6	27
P09871	Complement C1s subcomponent	TNFDNDIALVR	b2	heavy	644.333	216.098	25	32
P09871	Complement C1s subcomponent	TNFDNDIALVR	b2	light	639.333	216.098	25	32
PEP2014012820	Apolipoprotein(a)	TPAYYPNAGLIK	y7	heavy	658.361	720.449	23.8	36
PEP2014012820	Apolipoprotein(a)	TPAYYPNAGLIK	y7	heavy	658.361	883.513	23.8	34
PEP2014012820	Apolipoprotein(a)	TPAYYPNAGLIK	y7	light	654.35	712.43	23.8	36
PEP2014012820	Apolipoprotein(a)	TPAYYPNAGLIK	y7	light	654.35	875.5	23.8	34
PEP2015082124	Kininogen-1	TVGSDTFYSFK	y9	heavy	630.306	1059.49	22.9	23
PEP2015082124	Kininogen-1	TVGSDTFYSFK	y9	light	626.306	1051.49	22.9	23
P02655	Apolipoprotein C-II	TYLPAVDEK	b2	heavy	522.279	265.118	15.4	23
P02655	Apolipoprotein C-II	TYLPAVDEK	b2	light	518.27	265.118	15.4	23
O14791	Apolipoprotein L1	VAQELEEK	y6	heavy	477.256	783.397	4.5	22
O14791	Apolipoprotein L1	VAQELEEK	y6	heavy	477.256	171.113	4.5	22
O14791	Apolipoprotein L1	VAQELEEK	y6	heavy	477.256	854.435	4.5	23
O14791	Apolipoprotein L1	VAQELEEK	y6	light	473.249	775.397	4.5	23
O14791	Apolipoprotein L1	VAQELEEK	y6	light	473.256	171.113	4.5	23
O14791	Apolipoprotein L1	VAQELEEK	y6	light	473.249	846.435	4.5	23
P01031	Complement C5	VFQFLEK	y5	heavy	459.763	672.381	25.6	19
P01031	Complement C5	VFQFLEK	y5	heavy	459.763	819.449	25.6	19
P01031	Complement C5	VFQFLEK	y5	light	455.755	664.37	25.6	23
P01031	Complement C5	VFQFLEK	y5	light	455.755	811.43	25.6	23
PEP2014012801	Plasminogen activator inhibit	VFQQVAQASK	y5	heavy	557.311	512.292	8.1	23
PEP2014012801	Plasminogen activator inhibit	VFQQVAQASK	y5	heavy	557.311	867.477	8.1	23
PEP2014012801	Plasminogen activator inhibit	VFQQVAQASK	y5	light	553.3	504.28	8.1	23
PEP2014012801	Plasminogen activator inhibit	VFQQVAQASK	y5	light	553.3	859.46	8.1	23
P05156	Complement factor I	VFSLQWGEVK	y8	heavy	600.829	954.514	32.7	23
P05156	Complement factor I	VFSLQWGEVK	y8	light	596.829	946.514	32.7	23
P69905	Hemoglobin subunit alpha	VGAHAGEYGAEALER	y4	heavy	513.92	498.29	11.6	24
P69905	Hemoglobin subunit alpha	VGAHAGEYGAEALER	y4	light	510.59	488.29	11.6	24
P29622	Kallistatin	VGSALFLSHNLK	y11++	heavy	431.919	597.84	23.5	21
P29622	Kallistatin	VGSALFLSHNLK	y11++	light	429.252	593.84	23.5	21
P00915	Carbonic anhydrase 1	VLDALQAIK	y7	heavy	489.81	766.46	25	19
P00915	Carbonic anhydrase 1	VLDALQAIK	y7	light	485.81	758.46	25	19
PEP2013021305	Apolipoprotein D	VLNQELR	y5	heavy	441.258	669.356	7.8	23
PEP2013021305	Apolipoprotein D	VLNQELR	y5	light	436.258	659.356	7.8	23
Q14520	Hyaluronan-binding protein 2	VVLGDQDLK	y7	heavy	497.787	796.429	13.9	22
Q14520	Hyaluronan-binding protein 2	VVLGDQDLK	y7	light	493.787	788.429	13.9	22
P00750	Tissue-type plasminogen activator	VVPGEEEQK	y7	heavy	511.766	824.388	3.7	19
P00750	Tissue-type plasminogen activator	VVPGEEEQK	y7	light	507.766	816.388	3.7	19
Q9NZP8	Complement C1r subcomponent-like protein	VVVHPDYR	y7++	heavy	332.184	448.237	6.5	15
Q9NZP8	Complement C1r subcomponent-like protein	VVVHPDYR	y7++	light	328.847	443.23	6.5	15
O00187	Mannan-binding lectin serine protease 2	WPEPVFGR	y5	heavy	499.261	585.338	26.7	27
O00187	Mannan-binding lectin serine protease 2	WPEPVFGR	y5	light	494.256	575.329	26.7	27
P08185	Corticosteroid-binding globulin	WSAGLTSSQVDLYIPK	y2	heavy	886.969	252.18	36.5	39
P08185	Corticosteroid-binding globulin	WSAGLTSSQVDLYIPK	y2	light	882.962	244.166	36.5	39
P02679	Fibrinogen gamma chain	YEASILTHDSSIR	y11++	heavy	501.256	605.327	17.8	23
P02679	Fibrinogen gamma chain	YEASILTHDSSIR	y11++	light	497.92	600.32	17.8	23
PEP20121106047	Keratin,type II cytoskeletal	YEELQVTVGR	b2	heavy	602.316	293.113	18.1	30
PEP20121106047	Keratin, type II cytoskeletal	YEELQVTVGR	b2	light	597.312	293.114	18.1	30
P06276	Cholinesterase	YLTLNTESTR	y8	heavy	604.314	931.472	14.3	30
P06276	Cholinesterase	YLTLNTESTR	y8	light	599.314	921.472	14.3	30
P02753	Retinol-binding protein 4	YWGVASFLQK	y8	heavy	603.824	857.497	36.3	28
P02753	Retinol-binding protein 4	YWGVASFLQK	y8	light	599.824	849.497	36.3	28
